# Supplementary material for: Evaluation of the impact of Illumina error correction tools on de novo genome assembly
Source: PubMed Central journal article supplement (PMC5563063; doi:10.1186/s12859-017-1784-8), 2017-08-18
Supplement: 12859_2017_1784_MOESM1_ESM.pdf [file 12859_2017_1784_MOESM1_ESM.pdf]

Supplementary Data:  
Evaluation of the Impact of Illumina Error Correction Tools  
on de novo Genome Assembly

Mahdi Heydari<sup>1,4</sup>, Giles Miclotte<sup>1,4</sup>, Piet Demeester<sup>1,4</sup>,  
Yves Van de Peer<sup>2,3,4,5</sup>, and Jan Fostier<sup>1,4</sup>

<sup>1</sup>Department of Information Technology, Ghent University-imec, IDLab, Ghent, Belgium

<sup>2</sup>Center for Plant Systems Biology, VIB, Ghent, Belgium

<sup>3</sup>Department of Plant Biotechnology and Bioinformatics, Ghent University, Ghent, Belgium

<sup>4</sup>Bioinformatics Institute Ghent, Ghent, Belgium

<sup>5</sup>Department of Genetics, Genome Research Institute, University of Pretoria, Pretoria, South  
Africa

Contact: [jan.fostier@ugent.be](mailto:jan.fostier@ugent.be)

# Contents

|          |                                                 |           |
|----------|-------------------------------------------------|-----------|
| <b>1</b> | <b>Error Correction Tool Parameter Settings</b> | <b>4</b>  |
| 1.1      | ACE                                             | 4         |
| 1.2      | BayesHammer v. 3.7.1                            | 4         |
| 1.3      | BFC v. r181                                     | 4         |
| 1.4      | BLESS 2 v. 1.02                                 | 4         |
| 1.5      | Blue v. 1.1.2                                   | 5         |
| 1.6      | Fiona v. 0.2.5                                  | 5         |
| 1.7      | Karect v. 1.0                                   | 5         |
| 1.8      | Lighter v. 1.1.0                                | 6         |
| 1.9      | Musket v. 1.1                                   | 6         |
| 1.10     | RACER v. 1.0.1                                  | 6         |
| 1.11     | SGA-EC v. 0.10.14                               | 6         |
| 1.12     | Trowel v. 0.2.0.4                               | 6         |
| <b>2</b> | <b>Data simulation</b>                          | <b>8</b>  |
| <b>3</b> | <b>Error Metrics</b>                            | <b>8</b>  |
| 3.1      | Alignment ratio                                 | 8         |
| 3.2      | EC gain                                         | 9         |
| 3.2.1    | Accuracy comparison method                      | 9         |
| 3.2.2    | Real Data                                       | 10        |
| 3.2.3    | Simulated Data                                  | 11        |
| <b>4</b> | <b>Assembly Result for Real Data</b>            | <b>13</b> |
| 4.1      | DISCOVAR                                        | 14        |
| 4.1.1    | <i>B. dentium</i>                               | 14        |
| 4.1.2    | <i>E. coli str. K-12 substr. DH10B</i>          | 15        |
| 4.1.3    | <i>E. coli str. K-12 substr. MG1655</i>         | 16        |
| 4.1.4    | <i>S. enterica</i>                              | 17        |
| 4.1.5    | <i>P. aeruginosa</i>                            | 18        |
| 4.1.6    | <i>H. sapiens</i> Chr. 21                       | 19        |
| 4.1.7    | <i>C. elegans</i>                               | 20        |
| 4.1.8    | <i>D. melanogaster</i>                          | 21        |
| 4.2      | IDBA                                            | 22        |
| 4.2.1    | <i>B. dentium</i>                               | 22        |
| 4.2.2    | <i>E. coli str. K-12 substr. DH10B</i>          | 23        |
| 4.2.3    | <i>E. coli str. K-12 substr. MG1655</i>         | 24        |
| 4.2.4    | <i>S. enterica</i>                              | 25        |
| 4.2.5    | <i>P. aeruginosa</i>                            | 26        |
| 4.2.6    | <i>H. sapiens</i> Chr. 21                       | 27        |
| 4.2.7    | <i>C. elegans</i>                               | 28        |
| 4.2.8    | <i>D. melanogaster</i>                          | 29        |
| 4.3      | SPAdes                                          | 29        |
| 4.3.1    | <i>B. dentium</i>                               | 29        |
| 4.3.2    | <i>E. coli str. K-12 substr. DH10B</i>          | 31        |
| 4.3.3    | <i>E. coli str. K-12 substr. MG1655</i>         | 32        |
| 4.3.4    | <i>S. enterica</i>                              | 33        |
| 4.3.5    | <i>P. aeruginosa</i>                            | 34        |
| 4.3.6    | <i>H. sapiens</i> Chr. 21                       | 36        |
| 4.3.7    | <i>C. elegans</i>                               | 37        |
| 4.3.8    | <i>D. melanogaster</i>                          | 38        |

|          |                                                       |           |
|----------|-------------------------------------------------------|-----------|
| 4.4      | Velvet                                                | 39        |
| 4.4.1    | <i>B. dentium</i>                                     | 39        |
| 4.4.2    | <i>E. coli str. K-12 substr. DH10B</i>                | 40        |
| 4.4.3    | <i>E. coli str. K-12 substr. MG1655</i>               | 41        |
| 4.4.4    | <i>S. enterica</i>                                    | 42        |
| 4.4.5    | <i>P. aeruginosa</i>                                  | 43        |
| 4.4.6    | <i>H. sapiens</i> Chr. 21                             | 44        |
| 4.4.7    | <i>C. elegans</i>                                     | 45        |
| 4.4.8    | <i>D. melanogaster</i>                                | 46        |
| <b>5</b> | <b>Ability of EC tools to improve genome assembly</b> | <b>47</b> |
| <b>6</b> | <b>Memory and Runtime</b>                             | <b>48</b> |
| 6.1      | Real Data                                             | 48        |
| 6.1.1    | Memory                                                | 48        |
| 6.1.2    | Runtime                                               | 48        |
| 6.2      | Simulated Data                                        | 51        |
| 6.2.1    | Memory                                                | 51        |
| 6.2.2    | Runtime                                               | 51        |

# 1 Error Correction Tool Parameter Settings

All error correction tools were executed with 32 threads. Some tools need to be provided with the approximate genome size. For those tools, the exact genome size was provided. Some tools that internally operate on  $k$ -mers allow the user to specify the value of  $k$ . For all tables and figures in the main paper and in supplementary data, except Table 4 in the main paper, the default or recommended value of  $k$  was taken for each tool, regardless of dataset or assembly tool that was used.

To generate the results of Table 4 in the main paper, the optimal value of  $k$  was selected for each EC tool/dataset combination by running the EC tool multiple times with different  $k$ -mer sizes. The optimal  $k$ -mer size then corresponds to the SPAdes assembly that yields the highest scaffold N50. This way of selecting the optimal value of  $k$  would be identical to an end-user who wants to optimally assemble a new genome in absence of a reference genome. Below, the actual parameters are specified for each tool individually:

## 1.1 ACE

The  $k$ -mer size for ACE is built-in and cannot be specified by the user.

```
$ size=$(stat -c%s genome.fasta)
$ ./ace $size $inputreads aceOut/aceCorrected
```

## 1.2 BayesHammer v. 3.7.1

The  $k$ -mer size for BayesHammer is built-in and cannot be specified by the user.

```
$ ./spades.py -t 32 --careful --12 $inputreads -o bayesHammerOut
--only-error-correction --disable-gzip-output
```

## 1.3 BFC v. r181

```
$ size=$(stat -c%s genome.fasta)
$ ./bfc -s $size -k 33 -t 32 $inputreads >bfcOut/bfcCorrected
```

Following table shows the scaffold N50 of the SPAdes assembly from BFC-corrected reads for different values of  $k$  used in BFC.

| $k$ -mer size | D1             | D2             | D3             | D4             | D5             | D6            | D7           | D8            |
|---------------|----------------|----------------|----------------|----------------|----------------|---------------|--------------|---------------|
| 29            | 287 949        | 108 254        | 133 309        | 723 537        | 289 353        | <b>16 529</b> | <b>7 879</b> | 82 402        |
| 31            | 287 949        | 108 254        | 133 309        | 723 537        | 289 353        | 16 294        | 7 869        | 80 872        |
| 33            | <b>287 949</b> | <b>108 254</b> | <b>133 309</b> | <b>723 537</b> | <b>289 353</b> | 16 484        | 7 871        | 82 203        |
| 35            | 287 949        | 107 839        | 133 309        | 723 537        | 289 353        | 16 273        | 7 857        | <b>83 364</b> |
| 37            | 287 949        | 107 839        | 133 309        | 723 537        | 289 353        | 15 856        | 7 865        | 82 486        |

Therefore, in Table 4 of the main paper,  $k = 33$  was used for datasets D1, D2, D3, D4 and D5;  $k = 29$  was used for datasets D6 and D7;  $k = 35$  was used for dataset D8. The default value of  $k = 33$  was used for all other tables and figures.

## 1.4 BLESS 2 v. 1.02

```
$ ./bless -read $inputreads -prefix blessOut/blessCorrected
-kmerlength 31 -smpthread 32
```

Following table shows the scaffold N50 of the SPAdes assembly from BLESS-corrected reads for different values of  $k$  used in BLESS 2.

| <i>k</i> -mer size | D1             | D2             | D3             | D4             | D5             | D6            | D7           | D8            |
|--------------------|----------------|----------------|----------------|----------------|----------------|---------------|--------------|---------------|
| 27                 | 397 392        | <b>108 357</b> | <b>133 309</b> | 381 567        | 264 881        | <b>14 672</b> | 3 894        | 44 783        |
| 29                 | 397 392        | 108 254        | <b>133 309</b> | 381 537        | 264 881        | 13 970        | <b>3 996</b> | <b>45 633</b> |
| 31                 | <b>397 392</b> | 108 254        | 126 410        | 381 864        | 264 881        | 13 678        | 3 931        | 43 315        |
| 33                 | 397 392        | 108 254        | 126 410        | <b>412 097</b> | 264 881        | 14 267        | 3 834        | 41 579        |
| 35                 | 397 392        | 108 254        | 126 410        | 412 031        | <b>289 353</b> | 14 180        | 3 723        | 41 677        |

Therefore, in Table 4 of the main paper,  $k = 27$  was used for datasets D2, D3 and D6;  $k = 29$  was used for datasets D7 and D8;  $k = 33$  was used for dataset D4;  $k = 35$  was used for dataset D5. The default value of  $k = 31$  was used for all other tables and figures.

### 1.5 Blue v. 1.1.2

```
$ size=$(stat -c%s genome.fasta)
$ mono Tessel.exe -k 25 -g $size -t 32 Cspor $inputreads
$ mono Blue.exe -r blueCorrected -t 32 -o blueOut Cspor_31.cbt reads
```

Following table shows the scaffold N50 of the SPAdes assembly from Blue-corrected reads for different values of  $k$  used in Blue.

| <i>k</i> -mer size | D1             | D2             | D3             | D4             | D5             | D6            | D7           | D8            |
|--------------------|----------------|----------------|----------------|----------------|----------------|---------------|--------------|---------------|
| 21                 | <b>292 264</b> | 107 776        | 133 088        | 723 550        | <b>314 485</b> | 13 572        | 7 454        | 77 807        |
| 25                 | 287 948        | 107 774        | <b>133 309</b> | <b>723 550</b> | 289 314        | 13 214        | <b>7 708</b> | 83 277        |
| 27                 | 287 948        | <b>108 189</b> | 133 309        | 723 366        | 289 314        | <b>13 690</b> | 7 686        | 84 876        |
| 29                 | 287 948        | <b>108 189</b> | 133 309        | 723 537        | 289 314        | 13 397        | 7 685        | 85 463        |
| 31                 | 287 948        | <b>108 189</b> | 133 309        | 723 537        | 289 314        | 13 300        | 7 682        | <b>86 523</b> |

Therefore, in Table 4 of the main paper,  $k = 21$  was used for datasets D1 and D5;  $k = 25$  was used for datasets D3, D4 and D7;  $k = 27$  was used for dataset D6;  $k = 31$  was used for datasets D2 and D8. The default value of  $k = 25$  was used for all other tables and figures.

### 1.6 Fiona v. 0.2.5

The  $k$ -mer size for Fiona is built-in and cannot be specified by the user.

```
$ size=$(stat -c%s genome.fasta)
$ ./fiona -nt 32 -g $size $inputreads fionaOut/fionaCorrected
```

### 1.7 Karect v. 1.0

```
$ ./karect -correct -inputfile=$inputreads -matchtype=hamming
-celltype=diploid -resultdir=karectOut -kmer=9 -memory=32 -threads=32
```

Following table shows the scaffold N50 of the SPAdes assembly from Karect-corrected reads for different values of  $k$  used in Karect.

| <i>k</i> -mer | D1             | D2             | D3             | D4             | D5             | D6            | D7           | D8            |
|---------------|----------------|----------------|----------------|----------------|----------------|---------------|--------------|---------------|
| 9             | <b>287 949</b> | <b>108 228</b> | <b>133 309</b> | <b>725 282</b> | <b>289 353</b> | <b>17 170</b> | 7 923        | <b>88 533</b> |
| 11            | 287 949        | 108 228        | 133 309        | 725 282        | 289 353        | 17 170        | 7 923        | 88 533        |
| 13            | 287 949        | 108 228        | 133 309        | 723 537        | 289 353        | 16 805        | <b>7 944</b> | 88 135        |
| 14            | 287 949        | 108 228        | 133 309        | 723 537        | 289 353        | 16 866        | 7 917        | 87 347        |

Therefore, in Table 4 of the main paper,  $k = 9$  was used for datasets D1, D2, D3, D4, D5, D6 and D8;  $k = 13$  was used for dataset D7; The default value of  $k = 9$  was used for all other tables and figures. It should be noted that Karect sometimes overrides the user-specified value for  $k$  to a value it considers to be more suitable.

## 1.8 Lighter v. 1.1.0

```
$ size=$(stat -c%s genome.fasta)
```

```
$ ./lighter -t 32 -K 17 $size -r $inputreads -od lighterOut/lighterCorrected
```

Following table shows the scaffold N50 of the SPAdes assembly from Lighter-corrected reads for different values of  $k$  used in Lighter.

| $k$ -mer | D1             | D2             | D3             | D4             | D5             | D6            | D7           | D8            |
|----------|----------------|----------------|----------------|----------------|----------------|---------------|--------------|---------------|
| 13       | 287 949        | <b>108 254</b> | 133 309        | 412 163        | <b>289 353</b> | 15 197        | <b>7 946</b> | 83 760        |
| 15       | 287 949        | 107 839        | 133 309        | 723 537        | 289 353        | 16 096        | 7 599        | <b>84 674</b> |
| 17       | <b>287 949</b> | 107 839        | <b>133 309</b> | <b>723 537</b> | 264 881        | 16 666        | 7 154        | 79 363        |
| 19       | 287 949        | 107 839        | 133 309        | 723 537        | 289 353        | 16 734        | 7 455        | 80 331        |
| 21       | 287 949        | 107 839        | 133 309        | 723 537        | 289 353        | <b>16 826</b> | 7 726        | 82 346        |

Therefore, in Table 4 of the main paper,  $k = 13$  was used for datasets D2, D5 and D7;  $k = 15$  was used for dataset D8;  $k = 17$  was used for datasets D1, D3 and D4;  $k = 21$  was used for dataset D6. The default value of  $k = 17$  was used for all other tables and figures.

## 1.9 Musket v. 1.1

```
$ ./musket -inorder -p 32 $inputreads -o musketOut/musketCorrected
```

Following table shows the scaffold N50 of the SPAdes assembly from Musket-corrected reads for different values of  $k$  used in Musket.

| $k$ -mer | D1             | D2             | D3             | D4             | D5             | D6            | D7           | D8            |
|----------|----------------|----------------|----------------|----------------|----------------|---------------|--------------|---------------|
| 17       | 287 949        | 107 839        | 133 309        | 723 537        | <b>289 353</b> | 16 152        | 5 808        | 58 138        |
| 21       | <b>287 949</b> | 107 839        | <b>133 309</b> | <b>723 537</b> | 264 881        | <b>16 419</b> | 6 334        | 63 519        |
| 23       | 287 949        | 107 839        | 125 608        | 723 537        | <b>289 353</b> | 16 414        | 7 190        | 70 009        |
| 25       | 287 949        | <b>108 254</b> | 125 608        | 723 537        | <b>289 353</b> | 16 260        | 7 598        | 69 990        |
| 27       | 287 949        | <b>108 254</b> | 133 309        | 723 537        | <b>289 353</b> | 15 816        | <b>7 704</b> | <b>75 521</b> |

Therefore, in Table 4 of the main paper,  $k = 21$  was used for datasets D1, D3, D4 and D6;  $k = 27$  was used for dataset D2, D5, D7 and D8. The default value of  $k = 21$  was used for all other tables and figures.

## 1.10 RACER v. 1.0.1

The  $k$ -mer size for RACER is built-in and cannot be specified by the user.

```
$ size=$(stat -c%s genome.fasta)
```

```
$ ./racer.exe $inputreads racerOut/Corrected $size
```

## 1.11 SGA-EC v. 0.10.14

No  $k$ -mer value has to be specified for SGA-EC.

```
$ ./sga preprocess --permute-ambiguous --no-primer-check -o sgaOut/temp  
-p=2 -m 11 $inputreads
```

```
$ ./sga index -a ropebwt -t 32 --no-reverse sgaOut/temp
```

```
$ ./sga correct --learn -t 32 -o sgaOut/sgaCorrectede sgaOut/temp
```

## 1.12 Trowel v. 0.2.0.4

```
$echo $inputreads> trowelOut/trowelInput
```

```
$ ./trowel.0.2.0.4.linux.64 -k 11 -t 32 -f trowelOut/trowelCorrected
```

Following table shows the scaffold N50 of the SPAdes assembly from Trowel-corrected reads for different values of  $k$  used in Trowel.

| $k$ -mer | D1             | D2             | D3             | D4             | D5             | D6            | D7           | D8            |
|----------|----------------|----------------|----------------|----------------|----------------|---------------|--------------|---------------|
| 11       | <b>287 948</b> | <b>108 254</b> | <b>133 309</b> | <b>723 537</b> | <b>289 353</b> | 13 493        | 7 913        | 77 879        |
| 13       | 287 948        | 108 254        | 133 189        | 723 537        | 289 353        | 14 000        | <b>7 938</b> | 77 308        |
| 15       | 287 948        | 108 254        | 133 309        | 723 537        | 289 353        | <b>14 042</b> | 7 909        | <b>79 217</b> |

Therefore, in Table 4 of the main paper,  $k = 11$  was used for datasets D1, D2, D3, D4 and D5;  $k = 13$  was used for dataset D7;  $k = 15$  was used for datasets D6 and D7. The default value of  $k = 11$  was used for all other tables and figures.

## 2 Data simulation

To compare the performance of error correction tools (EC tools) on simulated data, we produced synthetic Illumina reads for the same set of organisms for which real data was used. The ART read simulator is used to generate reads, with the following command:

```
$ ./art_illumina -i genome.fasta -p -l [len] -f [cov] -m 300 -s 30 -o reads
```

Where `cov` and `len` correspond to the coverage and length and change according to the values in real datasets. The mean fragment size is 300 bp, and the fragment standard deviation is 30 bp.

## 3 Error Metrics

### 3.1 Alignment ratio

Reads are grouped based on the number of mismatches ( $m$ ) after aligning them to the reference genome using BWA v. 0.7.12:

```
$ ./bwa mem -M -t 32 -p reference/genome.fasta reads.fastq
>alignment/samfileName.sam
```

Table 1 shows the percentage of reads that align to the reference genome without mismatches ( $m = 0$ ). Table 2 shows the percentage of reads that do not align to the reference genome with  $<10$  mismatches. The ‘Uncorrected’ row shows the results of the raw data.

Table 1: Percentage of reads that mapped with 0 mismatches (%).

| Tool        | <i>B. dentium</i> | <i>E. coli DH10B</i> | <i>E. coli MG1655</i> | <i>S. enterica</i> | <i>P. aeruginosa</i> | <i>H. sapiens</i> Chr. 21 | <i>C. elegans</i> | <i>D. melanogaster</i> |
|-------------|-------------------|----------------------|-----------------------|--------------------|----------------------|---------------------------|-------------------|------------------------|
| Uncorrected | 70.16             | 76.31                | 61.07                 | 55.17              | 83.64                | 69.36                     | 70.41             | 50.32                  |
| ACE         | 98.04             | 98.83                | 98.83                 | 94.61              | 98.75                | 82.33                     | 79.09             | 60.14                  |
| BayesHammer | 93.40             | 95.77                | 89.37                 | 90.15              | 95.95                | 81.46                     | 78.01             | 57.75                  |
| BFC         | 97.41             | 98.86                | 96.65                 | 92.35              | 98.48                | 83.09                     | 78.57             | 59.82                  |
| BLESS 2     | 96.86             | 98.43                | 96.48                 | 90.14              | 98.24                | 83.46                     | 78.48             | 59.66                  |
| Blue        | 98.58             | 99.64                | 99.15                 | 94.23              | 99.11                | 82.28                     | 78.41             | 60.07                  |
| Fiona       | 96.26             | 97.93                | 96.61                 | 89.49              | 97.64                | 82.16                     | 78.11             | 59.23                  |
| Karect      | 98.04             | 99.29                | 98.84                 | 93.94              | 98.51                | 83.17                     | 79.07             | 59.97                  |
| Lighter     | 96.72             | 98.58                | 97.87                 | 89.63              | 97.09                | 81.36                     | 77.15             | 58.70                  |
| Musket      | 97.67             | 98.99                | 96.82                 | 92.17              | 98.40                | 81.78                     | 77.80             | 59.72                  |
| RACER       | 97.30             | 98.58                | 98.01                 | 91.40              | 98.40                | 82.21                     | 78.51             | 59.69                  |
| SGA-EC      | 90.14             | 93.76                | 78.88                 | 86.35              | 94.97                | 81.51                     | 78.06             | 58.06                  |
| Trowel      | 85.63             | 90.76                | 82.72                 | 79.01              | 92.37                | 75.85                     | 74.68             | 54.90                  |

Table 2: Percentage of reads that do not align with  $<10$  mismatches.

| Tool        | <i>B. dentium</i> | <i>E. coli DH10B</i> | <i>E. coli MG1655</i> | <i>S. enterica</i> | <i>P. aeruginosa</i> | <i>H. sapiens</i> Chr. 21 | <i>C. elegans</i> | <i>D. melanogaster</i> |
|-------------|-------------------|----------------------|-----------------------|--------------------|----------------------|---------------------------|-------------------|------------------------|
| Uncorrected | 2.76              | 0.95                 | 0.39                  | 9.99               | 0.90                 | 0.62                      | 18.11             | 6.80                   |
| ACE         | 0.33              | 0.01                 | 0.11                  | 3.20               | 0.28                 | 0.33                      | 17.12             | 6.34                   |
| BayesHammer | 1.27              | 0.15                 | 0.02                  | 3.33               | 0.40                 | 0.22                      | 16.69             | 6.47                   |
| BFC         | 1.45              | 0.19                 | 0.30                  | 5.20               | 0.66                 | 0.54                      | 18.05             | 6.67                   |
| BLESS 2     | 1.32              | 0.19                 | 0.49                  | 5.07               | 0.66                 | 0.61                      | 18.07             | 6.84                   |
| Blue        | 1.09              | 0.03                 | 0.20                  | 4.31               | 0.49                 | 0.44                      | 17.88             | 6.60                   |
| Fiona       | 1.48              | 0.11                 | 0.17                  | 5.40               | 0.51                 | 0.41                      | 17.78             | 6.60                   |
| Karect      | 1.11              | 0.02                 | 0.17                  | 3.88               | 0.43                 | 0.39                      | 17.73             | 6.58                   |
| Lighter     | 1.47              | 0.10                 | 0.19                  | 5.45               | 0.59                 | 0.47                      | 17.84             | 6.63                   |
| Musket      | 1.34              | 0.15                 | 0.26                  | 4.96               | 0.62                 | 0.47                      | 17.89             | 6.60                   |
| RACER       | 1.31              | 0.14                 | 0.23                  | 4.88               | 0.51                 | 0.45                      | 17.70             | 6.65                   |
| SGA-EC      | 2.54              | 0.76                 | 0.35                  | 9.14               | 0.75                 | 0.55                      | 18.06             | 6.70                   |
| Trowel      | 1.95              | 0.56                 | 0.23                  | 7.03               | 0.69                 | 0.53                      | 17.69             | 6.70                   |



## 3.2 EC gain

### 3.2.1 Accuracy comparison method

Accuracy comparison of EC tools in simulated data is straightforward since the perfect read is known. Let  $R$  represent an input read. For each read  $R$ , there is a corresponding read  $C$  which is corrected by any of the EC tools. In artificial data, a perfect read  $P$  is provided together with  $R$ . Therefore, for the evaluation of tools in simulated data, bases in these three reads ( $R$ ,  $P$  and  $C$ ) are compared and classified as follows:

$$\begin{aligned} tp : R_c \neq P_c \text{ and } C_c = P_c, TP &= \sum_{c \in R} tp; \\ tn : R_c = P_c \text{ and } C_c = P_c, TN &= \sum_{c \in R} tn; \\ fp : R_c = P_c \text{ and } C_c \neq P_c, FP &= \sum_{c \in R} fp; \\ fn : R_c \neq P_c \text{ and } C_c \neq P_c, FN &= \sum_{c \in R} fn. \end{aligned}$$

The error correction gain (EC gain) is then defined as

$$\text{EC gain} = \frac{TP - FP}{TP + FN}.$$

An EC gain of 100% means all errors were corrected and no new errors were introduced. Additionally, sensitivity and false positive rate (FP rate) are defined as follows:

$$\begin{aligned} \text{Sensitivity} &= \frac{TP}{TP + FN}, \\ \text{FP rate} &= \frac{FP}{TN + FP}. \end{aligned}$$

### 3.2.2 Real Data

Exact numbers of TP, TN, FP and FN for real data are shown in Table 3.

Table 3: Detailed confusion matrices for real data.

| Tool                                                                | Dataset           |                      |                       |                    |                      |                           |                   |                        |
|---------------------------------------------------------------------|-------------------|----------------------|-----------------------|--------------------|----------------------|---------------------------|-------------------|------------------------|
|                                                                     | <i>B. dentium</i> | <i>E. coli DH10B</i> | <i>E. coli MG1655</i> | <i>S. enterica</i> | <i>P. aeruginosa</i> | <i>H. sapiens</i> Chr. 21 | <i>C. elegans</i> | <i>D. melanogaster</i> |
| <b>True Positives (TP) – corrected errors</b>                       |                   |                      |                       |                    |                      |                           |                   |                        |
| ACE                                                                 | 3076751           | 8332547              | 22291105              | 3701334            | 3292214              | 5032509                   | 10795486          | 25245221               |
| BFC                                                                 | 2482403           | 7142877              | 18036534              | 3083801            | 2670043              | 4444675                   | 9330314           | 18081922               |
| Blue                                                                | 3112185           | 8400946              | 22279091              | 3674979            | 3246700              | 4915665                   | 10326983          | 22965194               |
| Fiona                                                               | 2757539           | 8018906              | 21957781              | 3239983            | 3111415              | 4978875                   | 10486053          | 23052956               |
| Karect                                                              | 3133184           | 8450316              | 22414636              | 3732389            | 3331053              | 5287884                   | 11220434          | 25992487               |
| Lighter                                                             | 2694538           | 7952212              | 20837800              | 3038404            | 2927161              | 4014919                   | 8650557           | 17759054               |
| Musket                                                              | 2878390           | 7922398              | 21005281              | 3335539            | 2961995              | 4345534                   | 9554662           | 19344147               |
| RACER                                                               | 2932759           | 8112897              | 22077431              | 3374675            | 3215041              | 4865921                   | 9987137           | 24864167               |
| SGA-EC                                                              | 1742936           | 5690254              | 10231654              | 2010468            | 2215005              | 4137311                   | 8965373           | 16986433               |
| Trowel                                                              | 1229337           | 4226181              | 9761215               | 1550337            | 1613647              | 1936362                   | 4575638           | 8640337                |
| <b>True Negatives (TN) – initially correct bases left untouched</b> |                   |                      |                       |                    |                      |                           |                   |                        |
| ACE                                                                 | 963422263         | 1931235385           | 2746256917            | 440139607          | 1039050327           | 1319616601                | 4737356765        | 5606869096             |
| BFC                                                                 | 964033360         | 1931274464           | 2746348400            | 441245208          | 1039248109           | 1321102045                | 4748425050        | 5612713036             |
| Blue                                                                | 964029362         | 1931244564           | 2746290398            | 441235585          | 1039242118           | 1320502326                | 4747747773        | 5611271694             |
| Fiona                                                               | 964035021         | 1931270828           | 2746332983            | 441244937          | 1039242743           | 1320774172                | 4747710215        | 5611944730             |
| Karect                                                              | 964034920         | 1931277673           | 2746357548            | 441245411          | 1039250137           | 1321107050                | 4748328371        | 5612244594             |
| Lighter                                                             | 964033340         | 1931268196           | 2746328586            | 441242591          | 1039192194           | 1320945136                | 4747204149        | 5611259898             |
| Musket                                                              | 964034290         | 1931275869           | 2746352663            | 441244510          | 1039244912           | 1320929786                | 4747597357        | 5610975777             |
| RACER                                                               | 964010310         | 1931159567           | 2746106691            | 441215449          | 1039223611           | 1317855370                | 4743412687        | 5604761363             |
| SGA-EC                                                              | 964034237         | 1931275385           | 2746351399            | 441245198          | 1039248037           | 1321074542                | 4748393243        | 5612994706             |
| Trowel                                                              | 964015541         | 1931230735           | 2745348701            | 441227802          | 1039224947           | 1320368303                | 4744149598        | 5612170398             |
| <b>False Positives (FP) – newly introduced errors</b>               |                   |                      |                       |                    |                      |                           |                   |                        |
| ACE                                                                 | 42115             | 45236                | 110238                | 66473              | 201973               | 1607588                   | 11276793          | 6306244                |
| BFC                                                                 | 2017              | 5828                 | 18069                 | 721                | 2751                 | 110312                    | 73154             | 411719                 |
| Blue                                                                | 7660              | 38812                | 81267                 | 13731              | 9982                 | 722472                    | 795185            | 1916850                |
| Fiona                                                               | 1939              | 12563                | 37718                 | 2501               | 9327                 | 458681                    | 867700            | 1224861                |
| Karect                                                              | 457               | 2624                 | 8951                  | 518                | 723                  | 105756                    | 171201            | 881629                 |
| Lighter                                                             | 2038              | 12099                | 37887                 | 3339               | 58686                | 267293                    | 1294892           | 1865549                |
| Musket                                                              | 1087              | 4430                 | 13816                 | 1419               | 5951                 | 282661                    | 901130            | 2149247                |
| RACER                                                               | 20414             | 119807               | 266323                | 25624              | 27673                | 3439109                   | 5209526           | 8553829                |
| SGA-EC                                                              | 1143              | 4912                 | 15115                 | 735                | 2890                 | 138742                    | 106266            | 134578                 |
| Trowel                                                              | 19913             | 49616                | 1032119               | 18304              | 26030                | 854611                    | 4415136           | 964727                 |
| <b>False Negatives (FN) – remaining errors</b>                      |                   |                      |                       |                    |                      |                           |                   |                        |
| ACE                                                                 | 72832             | 129122               | 189116                | 76350              | 100688               | 3178135                   | 3838512           | 47947216               |
| BFC                                                                 | 669265            | 1318746              | 4443590               | 704083             | 722347               | 3763717                   | 5294722           | 55097487               |
| Blue                                                                | 39497             | 60730                | 201157                | 112984             | 145698               | 3293805                   | 4298919           | 50218318               |
| Fiona                                                               | 393729            | 442232               | 522381                | 547490             | 280918               | 3236482                   | 4143215           | 50179596               |
| Karect                                                              | 18484             | 11307                | 65491                 | 55495              | 61337                | 2920538                   | 3404740           | 47187117               |
| Lighter                                                             | 457130            | 509413               | 1642324               | 749481             | 465237               | 4193495                   | 5974735           | 55420668               |
| Musket                                                              | 273278            | 539225               | 1474842               | 452345             | 430394               | 3862860                   | 5070408           | 53835292               |
| RACER                                                               | 223971            | 352560               | 403619                | 418534             | 177627               | 3351498                   | 4654443           | 48340247               |
| SGA-EC                                                              | 1408740           | 2771371              | 12248650              | 1777441            | 1177881              | 4071424                   | 5660045           | 56205417               |
| Trowel                                                              | 1922344           | 4235705              | 12724566              | 2237577            | 1778750              | 6274148                   | 10071360          | 64540776               |

### 3.2.3 Simulated Data

Table 4 shows the EC gain, sensitivity, and specificity expressed as number of errors introduced per Mbp of read data. Table 5 shows the exact numbers of TP, TN, FP and FN for all tools on the simulated data. BFC has the highest gain on four datasets, Karect and Fiona both have the highest gain on two datasets.

Table 4: Accuracy comparison in terms of EC gain, percentage of corrected errors, and number of errors introduced per Mbp in simulated data.

| Tool                                                    | Dataset           |                      |                       |                    |                      |                           |                   |                        |
|---------------------------------------------------------|-------------------|----------------------|-----------------------|--------------------|----------------------|---------------------------|-------------------|------------------------|
|                                                         | <i>B. dentium</i> | <i>E. coli DH10B</i> | <i>E. coli MG1655</i> | <i>S. enterica</i> | <i>P. aeruginosa</i> | <i>H. sapiens</i> Chr. 21 | <i>C. elegans</i> | <i>D. melanogaster</i> |
| <b>Error correction gain (%)</b>                        |                   |                      |                       |                    |                      |                           |                   |                        |
| ACE                                                     | 99.8              | 99.7                 | 99.8                  | 99.9               | 99.2                 | 81.2                      | 74.3              | 95.8                   |
| BFC                                                     | 99.9              | 99.8                 | 98.7                  | 99.9               | 99.8                 | 96.2                      | 99.3              | 99.7                   |
| Blue                                                    | 99.7              | 99.0                 | 99.1                  | 99.7               | 99.5                 | 85.1                      | 91.0              | 97.2                   |
| Fiona                                                   | 99.9              | 99.9                 | 99.7                  | 99.8               | 99.9                 | 90.3                      | 96.2              | 98.1                   |
| Karect                                                  | 99.9              | 99.8                 | 99.9                  | 99.9               | 99.8                 | 92.8                      | 98.0              | 99.4                   |
| Lighter                                                 | 99.3              | 99.6                 | 99.5                  | 99.2               | 98.2                 | 84.8                      | 83.6              | 90.0                   |
| Musket                                                  | 99.8              | 99.7                 | 99.8                  | 99.8               | 99.4                 | 88.5                      | 93.3              | 97.9                   |
| RACER                                                   | 99.2              | 98.9                 | 98.8                  | 99.2               | 98.6                 | 58.9                      | 69.1              | 87.6                   |
| SGA-EC                                                  | 99.6              | 99.7                 | 15.8                  | 99.8               | 99.8                 | 89.8                      | 96.8              | 97.6                   |
| Trowel                                                  | 84.1              | 83.5                 | 74.4                  | 85.7               | 81.6                 | 67.9                      | 76.1              | 75.8                   |
| <b>Sensitivity – percentage of corrected errors (%)</b> |                   |                      |                       |                    |                      |                           |                   |                        |
| ACE                                                     | 100.0             | 99.9                 | 99.9                  | 100.0              | 99.9                 | 94.3                      | 98.5              | 98.7                   |
| BFC                                                     | 99.9              | 99.8                 | 98.7                  | 99.9               | 99.9                 | 97.8                      | 99.4              | 99.8                   |
| Blue                                                    | 100.0             | 100.0                | 99.6                  | 100.0              | 100.0                | 91.3                      | 97.3              | 98.3                   |
| Fiona                                                   | 99.9              | 99.9                 | 99.8                  | 99.9               | 99.9                 | 95.6                      | 98.8              | 98.6                   |
| Karect                                                  | 100.0             | 100.0                | 100.0                 | 100.0              | 100.0                | 93.1                      | 99.3              | 99.5                   |
| Lighter                                                 | 99.4              | 99.7                 | 99.6                  | 99.3               | 98.9                 | 88.6                      | 89.3              | 92.7                   |
| Musket                                                  | 99.8              | 99.7                 | 99.8                  | 99.8               | 99.5                 | 90.0                      | 94.1              | 98.2                   |
| RACER                                                   | 99.9              | 99.9                 | 99.9                  | 99.9               | 99.9                 | 93.0                      | 97.7              | 98.6                   |
| SGA-EC                                                  | 99.6              | 99.7                 | 15.9                  | 99.8               | 99.9                 | 92.1                      | 97.8              | 97.8                   |
| Trowel                                                  | 84.3              | 83.5                 | 74.6                  | 85.8               | 81.6                 | 70.0                      | 76.8              | 76.0                   |
| <b>Number of errors introduced per Mbp of read data</b> |                   |                      |                       |                    |                      |                           |                   |                        |
| ACE                                                     | 12                | 4                    | 10                    | 9                  | 12                   | 1271                      | 389               | 280                    |
| BFC                                                     | 1                 | 0                    | 1                     | 1                  | 0                    | 156                       | 2                 | 8                      |
| Blue                                                    | 25                | 19                   | 43                    | 28                 | 8                    | 603                       | 102               | 105                    |
| Fiona                                                   | 3                 | 2                    | 13                    | 5                  | 1                    | 520                       | 41                | 49                     |
| Karect                                                  | 5                 | 3                    | 4                     | 5                  | 2                    | 35                        | 22                | 13                     |
| Lighter                                                 | 5                 | 1                    | 11                    | 7                  | 13                   | 368                       | 91                | 267                    |
| Musket                                                  | 1                 | 0                    | 2                     | 1                  | 1                    | 147                       | 13                | 28                     |
| RACER                                                   | 71                | 20                   | 101                   | 60                 | 24                   | 3312                      | 460               | 1063                   |
| SGA-EC                                                  | 1                 | 1                    | 6                     | 2                  | 1                    | 221                       | 16                | 19                     |
| Trowel                                                  | 18                | 1                    | 13                    | 6                  | 0                    | 203                       | 11                | 16                     |

Table 5: Detailed confusion matrices in simulated data

| Tool                                                                | Dataset           |                      |                       |                    |                      |                           |                   |                        |
|---------------------------------------------------------------------|-------------------|----------------------|-----------------------|--------------------|----------------------|---------------------------|-------------------|------------------------|
|                                                                     | <i>B. dentium</i> | <i>E. coli DH10B</i> | <i>E. coli MG1655</i> | <i>S. enterica</i> | <i>P. aeruginosa</i> | <i>H. sapiens</i> Chr. 21 | <i>C. elegans</i> | <i>D. melanogaster</i> |
| <b>True Positives (TP) – corrected errors</b>                       |                   |                      |                       |                    |                      |                           |                   |                        |
| ACE                                                                 | 9667046           | 3814496              | 27260933              | 4359012            | 1847493              | 12266571                  | 9180759           | 59347214               |
| BFC                                                                 | 9659287           | 3808751              | 26926157              | 4357828            | 1846499              | 12728393                  | 9263433           | 59962209               |
| Blue                                                                | 9666564           | 3815467              | 27161340              | 4359254            | 1848540              | 11881359                  | 9070130           | 59069399               |
| Fiona                                                               | 9660940           | 3815149              | 27232134              | 4356236            | 1847967              | 12446652                  | 9208110           | 59246494               |
| Karect                                                              | 9669223           | 3815493              | 27270690              | 4359797            | 1848298              | 12116343                  | 9257419           | 59816346               |
| Lighter                                                             | 9608363           | 3806153              | 27164122              | 4328575            | 1828813              | 11529659                  | 8318765           | 55726718               |
| Musket                                                              | 9650131           | 3805811              | 27216841              | 4352679            | 1839474              | 11713659                  | 8768168           | 59020638               |
| RACER                                                               | 9676980           | 3815294              | 27244781              | 4362894            | 1847896              | 12114016                  | 9116775           | 59266390               |
| SGA-EC                                                              | 9632731           | 3806414              | 4340616               | 4351854            | 1846414              | 11986144                  | 9115211           | 58761640               |
| Trowel                                                              | 8151159           | 3188984              | 20336922              | 3740932            | 1508617              | 9109108                   | 7155992           | 45677232               |
| <b>True Negatives (TN) – initially correct bases left untouched</b> |                   |                      |                       |                    |                      |                           |                   |                        |
| ACE                                                                 | 973643656         | 1954926851           | 2812136997            | 469845584          | 1056817153           | 1339880180                | 5805025579        | 6198006667             |
| BFC                                                                 | 973654353         | 1954933880           | 2812161687            | 469849372          | 1056829305           | 1341366583                | 5807245715        | 6199676406             |
| Blue                                                                | 973637810         | 1954901136           | 2812074791            | 469840224          | 1056822852           | 1340786550                | 5806685096        | 6199146502             |
| Fiona                                                               | 973652784         | 1954931510           | 2812129698            | 469847730          | 1056828691           | 1340902736                | 5807025162        | 6199437609             |
| Karect                                                              | 973650880         | 1954929616           | 2812153109            | 469847558          | 1056827837           | 1341529923                | 5807130529        | 6199647692             |
| Lighter                                                             | 973650027         | 1954932142           | 2812133532            | 469846600          | 1056816359           | 1341081880                | 5806729873        | 6198071892             |
| Musket                                                              | 973654027         | 1954933908           | 2812157389            | 469849138          | 1056829003           | 1341378585                | 5807181419        | 6199553951             |
| RACER                                                               | 973568663         | 1954896583           | 2811887873            | 469814560          | 1056805849           | 1337241860                | 5804649423        | 6193298979             |
| SGA-EC                                                              | 973653813         | 1954932504           | 2812146301            | 469848917          | 1056828854           | 1341281680                | 5807162255        | 6199608343             |
| Trowel                                                              | 973637311         | 1954932965           | 2812127117            | 469847097          | 1056829444           | 1341303372                | 5807194307        | 6199626029             |
| <b>False Positives (FP) – newly introduced errors</b>               |                   |                      |                       |                    |                      |                           |                   |                        |
| ACE                                                                 | 11677             | 8424                 | 27799                 | 4317               | 12971                | 1704723                   | 2259541           | 1733689                |
| BFC                                                                 | 530               | 784                  | 2325                  | 308                | 453                  | 208911                    | 9755              | 48551                  |
| Blue                                                                | 23995             | 37162                | 120731                | 12952              | 8471                 | 809236                    | 590384            | 650265                 |
| Fiona                                                               | 2641              | 3237                 | 36199                 | 2201               | 1114                 | 697478                    | 239447            | 301954                 |
| Karect                                                              | 4853              | 5856                 | 11865                 | 2481               | 2273                 | 46854                     | 128678            | 80121                  |
| Lighter                                                             | 4864              | 2539                 | 30517                 | 3084               | 13411                | 493732                    | 525707            | 1653388                |
| Musket                                                              | 864               | 774                  | 6650                  | 547                | 765                  | 196952                    | 74116             | 171110                 |
| RACER                                                               | 68975             | 39371                | 284440                | 27985              | 24868                | 4443967                   | 2673149           | 6591309                |
| SGA-EC                                                              | 1169              | 2366                 | 17850                 | 811                | 1015                 | 296150                    | 95000             | 118356                 |
| Trowel                                                              | 17589             | 1703                 | 36902                 | 2593               | 322                  | 272190                    | 61239             | 98964                  |
| <b>False Negatives (FN) – remaining errors</b>                      |                   |                      |                       |                    |                      |                           |                   |                        |
| ACE                                                                 | 3077              | 2683                 | 14041                 | 1593               | 1548                 | 748107                    | 139964            | 765300                 |
| BFC                                                                 | 10832             | 8426                 | 348803                | 2775               | 2539                 | 285163                    | 55299             | 148821                 |
| Blue                                                                | 3572              | 1715                 | 113685                | 1364               | 503                  | 1132600                   | 248773            | 1041986                |
| Fiona                                                               | 9208              | 2036                 | 42942                 | 4406               | 1075                 | 569220                    | 112234            | 866386                 |
| Karect                                                              | 898               | 1685                 | 4283                  | 806                | 740                  | 897266                    | 61366             | 294752                 |
| Lighter                                                             | 61758             | 11026                | 110850                | 32029              | 20236                | 1483959                   | 1000030           | 4384507                |
| Musket                                                              | 19988             | 11366                | 58119                 | 7925               | 9564                 | 1299912                   | 550568            | 1090406                |
| RACER                                                               | 13078             | 2956                 | 31690                 | 5943               | 1316                 | 916081                    | 214034            | 863661                 |
| SGA-EC                                                              | 37401             | 10771                | 22934352              | 8758               | 2629                 | 1027556                   | 203649            | 1349522                |
| Trowel                                                              | 1518960           | 628194               | 6938039               | 619671             | 340421               | 3904451                   | 2162752           | 14433803               |

## 4 Assembly Result for Real Data

In order to see the impact of EC tools on assembly results, we used SPAdes, DISCOVAR, IDBA and Velvet to assemble both corrected and uncorrected data. Quast provides comprehensive information on the assembly quality. For the Quast analyses, scaffolds were used. The following commands were used to run the assemblers.

- SPAdes (v. 3.7.1)  
`spades.py -t 32 --only-assembler --12 reads.fastq -o outputDir`
- DISCOVAR  
`DiscoverDeNovo READS=reads.fastq OUT_DIR=outputDir  
MEMORY_CHECK=true NUM_THREADS=32`
- Velvet (v. 1.2.10)  
`./velveth asmDir 31 -fastq -shortPaired reads.fastq  
./velvetg asmDir -exp_cov auto -cov_cutoff auto`
- IDBA(v. 1.1.1 )  
`./idba --no_correct -r reads.fa -o outputDir --num_threads 32`

Quast results for each dataset are shown in the following subsections. Assemblies were named after the EC tool that was used to preprocess the data. The ‘Uncorrected’ assembly was obtained from uncorrected data. Default parameter settings are used for Quast, i.e., all statistics are based on contigs of size  $\geq 500$  bp. The Quast (v. 4.4) command line was:

```
./quast.py asmDir/contigs.fa -R genome.fasta -o quastReport --plots-format  
ps -1 uncorrectedForwardRead.fq -2 uncorrectedReverseRead.fq --labels "toolName"
```

## 4.1 DISCOVAR

### 4.1.1 *B. dentium*

Table 6 contains the Quast report after assembling dataset *B. dentium* with DISCOVAR .

Table 6: Assembly quality metrics for *B. dentium*

| Assembly                        | Uncorrected   | ACE           | BayesHammer   | BFC           | BLESS2       | Blue         | Karect        | Lighter       | Musket       | RACER          | SGA-EC        |
|---------------------------------|---------------|---------------|---------------|---------------|--------------|--------------|---------------|---------------|--------------|----------------|---------------|
| # contigs ( $\geq 0$ bp)        | 41            | 40            | 34            | 34            | 28           | 40           | 31            | 34            | 37           | 31             | 34            |
| # contigs ( $\geq 1000$ bp)     | 19            | 22            | 18            | 18            | 17           | 23           | 18            | 18            | 20           | 18             | 18            |
| # contigs ( $\geq 5000$ bp)     | 17            | 18            | 16            | 16            | 15           | 18           | 16            | 16            | 18           | 15             | 16            |
| # contigs ( $\geq 10000$ bp)    | 15            | 16            | 14            | 14            | 13           | 16           | 14            | 14            | 16           | 13             | 14            |
| # contigs ( $\geq 25000$ bp)    | 15            | 15            | 14            | 14            | 13           | 14           | 14            | 14            | 15           | 13             | 14            |
| # contigs ( $\geq 50000$ bp)    | 11            | 10            | 10            | 10            | 10           | 10           | 10            | 10            | 11           | 10             | 10            |
| Total length ( $\geq 0$ bp)     | 2620312       | 2620550       | 2618818       | 2618819       | 2615877      | 2618828      | 2618035       | 2618817       | 2618219      | <b>2907328</b> | 2618819       |
| Total length ( $\geq 1000$ bp)  | 2613881       | 2614837       | 2613775       | 2613776       | 2612673      | 2613044      | 2613959       | 2613774       | 2612796      | <b>2903513</b> | 2613776       |
| Total length ( $\geq 5000$ bp)  | 2610478       | 2607949       | 2610372       | 2610373       | 2609270      | 2604556      | 2610556       | 2610371       | 2609393      | <b>2896805</b> | 2610373       |
| Total length ( $\geq 10000$ bp) | 2599192       | 2596663       | 2599086       | 2599087       | 2597984      | 2593270      | 2599270       | 2599085       | 2598107      | <b>2885519</b> | 2599087       |
| Total length ( $\geq 25000$ bp) | 2599192       | 2581604       | 2599086       | 2599087       | 2597984      | 2567611      | 2599270       | 2599085       | 2580596      | <b>2885519</b> | 2599087       |
| Total length ( $\geq 50000$ bp) | 2440269       | 2386840       | 2440165       | 2440166       | 2480462      | 2408689      | 2440349       | 2440165       | 2421675      | <b>2767997</b> | 2440166       |
| # contigs                       | 20            | 23            | 19            | 19            | 18           | 25           | 19            | 19            | 21           | 19             | 19            |
| Largest contig                  | 610357        | 573238        | 610358        | <b>610359</b> | 608981       | 608981       | 610358        | 610358        | 534355       | 610358         | <b>610359</b> |
| Total length                    | 2614583       | 2615539       | 2614477       | 2614478       | 2613375      | 2614479      | 2614661       | 2614476       | 2613498      | <b>2904215</b> | 2614478       |
| Reference length                | 2636367       | 2636367       | 2636367       | 2636367       | 2636367      | 2636367      | 2636367       | 2636367       | 2636367      | 2636367        | 2636367       |
| GC (%)                          | 58.51         | 58.51         | 58.51         | 58.51         | 58.50        | 58.51        | 58.51         | 58.51         | 58.51        | 58.63          | 58.51         |
| Reference GC (%)                | 58.54         | 58.54         | 58.54         | 58.54         | 58.54        | 58.54        | 58.54         | 58.54         | 58.54        | 58.54          | 58.54         |
| N50                             | 288053        | 271664        | 288054        | 288054        | 288054       | 271663       | 288053        | 288054        | 288054       | <b>397536</b>  | 288054        |
| NG50                            | 288053        | 271664        | 288054        | 288054        | 288054       | 271663       | 288053        | 288054        | 288054       | <b>397536</b>  | 288054        |
| N75                             | 148905        | 158597        | 158597        | 158597        | 172541       | 158597       | 158597        | 158597        | 158597       | <b>174159</b>  | 158597        |
| NG75                            | 148905        | 158597        | 158597        | 158597        | 172541       | 158597       | 158597        | 158597        | 158597       | <b>190580</b>  | 158597        |
| L50                             | 4             | 4             | 4             | 4             | 4            | 4            | 4             | 4             | 4            | <b>3</b>       | 4             |
| LG50                            | 4             | 4             | 4             | 4             | 4            | 4            | 4             | 4             | 4            | <b>3</b>       | 4             |
| L75                             | 7             | 7             | 7             | 7             | 7            | 7            | 7             | 7             | 7            | <b>6</b>       | 7             |
| LG75                            | 7             | 7             | 7             | 7             | 7            | 7            | 7             | 7             | 7            | <b>5</b>       | 7             |
| # misassemblies                 | <b>0</b>      | <b>0</b>      | <b>0</b>      | <b>0</b>      | 1            | 1            | <b>0</b>      | <b>0</b>      | 1            | 1              | <b>0</b>      |
| # misassembled contigs          | <b>0</b>      | <b>0</b>      | <b>0</b>      | <b>0</b>      | 1            | 1            | <b>0</b>      | <b>0</b>      | 1            | 1              | <b>0</b>      |
| Misassembled contigs length     | <b>0</b>      | <b>0</b>      | <b>0</b>      | <b>0</b>      | 608981       | 608981       | <b>0</b>      | <b>0</b>      | 534355       | 578715         | <b>0</b>      |
| # local misassemblies           | 1             | 2             | 1             | 1             | 2            | 1            | 1             | 1             | 1            | 2              | 1             |
| # unaligned mis. contigs        | 0             | 0             | 0             | 0             | 0            | 0            | 0             | 0             | 0            | 0              | 0             |
| # unaligned contigs             | 0 + 0 part    | 0 + 0 part    | 0 + 0 part    | 0 + 0 part    | 0 + 0 part   | 0 + 0 part   | 0 + 0 part    | 0 + 0 part    | 0 + 0 part   | 0 + 0 part     | 0 + 0 part    |
| Unaligned length                | 0             | 0             | 0             | 0             | 0            | 0            | 0             | 0             | 0            | 0              | 0             |
| Genome fraction (%)             | <b>99.116</b> | <b>99.116</b> | <b>99.116</b> | <b>99.116</b> | 99.064       | 99.064       | <b>99.116</b> | <b>99.116</b> | 99.064       | <b>99.116</b>  | <b>99.116</b> |
| Duplication ratio               | <b>1.001</b>  | <b>1.001</b>  | <b>1.001</b>  | <b>1.001</b>  | <b>1.001</b> | <b>1.001</b> | <b>1.001</b>  | <b>1.001</b>  | <b>1.001</b> | 1.111          | <b>1.001</b>  |
| # N's per 100 kbp               | <b>0.00</b>   | 3.82          | <b>0.00</b>   | <b>0.00</b>   | <b>0.00</b>  | <b>0.00</b>  | <b>0.00</b>   | <b>0.00</b>   | <b>0.00</b>  | 3.44           | <b>0.00</b>   |
| # mismatches per 100 kbp        | 0.31          | 0.31          | 0.34          | <b>0.23</b>   | 0.27         | 0.27         | 0.31          | 0.27          | <b>0.23</b>  | 0.31           | <b>0.23</b>   |
| # indels per 100 kbp            | 0.31          | 0.38          | 0.31          | 0.34          | 0.31         | <b>0.23</b>  | 0.27          | 0.38          | 0.31         | 0.27           | 0.34          |
| Largest alignment               | 610357        | 572957        | 610358        | <b>610359</b> | 425802       | 425802       | 610358        | 610358        | 425802       | 610358         | <b>610359</b> |
| Total aligned length            | 2614583       | 2615073       | 2614477       | 2614478       | 2613100      | 2614294      | 2614476       | 2614476       | 2613498      | <b>2903840</b> | 2614478       |
| NA50                            | 288053        | 271664        | 288054        | 288054        | 288054       | 271663       | 288053        | 288054        | 288054       | <b>289208</b>  | 288054        |
| NGA50                           | 288053        | 271664        | 288054        | 288054        | 288054       | 271663       | 288053        | 288054        | 288054       | <b>289208</b>  | 288054        |
| NA75                            | 148905        | 158597        | 158597        | 158597        | 172541       | 158597       | 158597        | 158597        | 148905       | <b>174159</b>  | 158597        |
| NGA75                           | 148905        | 158597        | 158597        | 158597        | 172541       | 158597       | 158597        | 158597        | 148905       | <b>190305</b>  | 158597        |
| LA50                            | 4             | 4             | 4             | 4             | 4            | 4            | 4             | 4             | 4            | 4              | 4             |
| LGA50                           | 4             | 4             | 4             | 4             | 4            | 4            | 4             | 4             | 4            | 4              | 4             |
| LA75                            | <b>7</b>      | <b>7</b>      | <b>7</b>      | <b>7</b>      | 8            | 8            | <b>7</b>      | <b>7</b>      | 8            | <b>7</b>       | <b>7</b>      |
| LGA75                           | 7             | 7             | 7             | 7             | 8            | 8            | 7             | 7             | 8            | <b>6</b>       | 7             |

#### 4.1.2 *E. coli str. K-12 substr. DH10B*

Table 7 contains the Quast report after assembling dataset *E. coli str. K-12 substr. DH10B* with DISCOVAR .

Table 7: Assembly quality metrics for *E. coli str. K-12 substr. DH10B*

| Assembly                        | Uncorrected   | ACE        | BayesHammer   | BFC         | BLESS2       | Blue           | Karect         | Lighter       | Musket       | RACER          | SGA-EC        |
|---------------------------------|---------------|------------|---------------|-------------|--------------|----------------|----------------|---------------|--------------|----------------|---------------|
| # contigs ( $\geq 0$ bp)        | 274           | 323        | 291           | 238         | 264          | 297            | 207            | 269           | 308          | 295            | 186           |
| # contigs ( $\geq 1000$ bp)     | 79            | 73         | 74            | 74          | 71           | 75             | 73             | 71            | 74           | 72             | 75            |
| # contigs ( $\geq 5000$ bp)     | 61            | 58         | 60            | 60          | 57           | 60             | 58             | 56            | 59           | 57             | 58            |
| # contigs ( $\geq 10000$ bp)    | 56            | 53         | 55            | 54          | 52           | 53             | 53             | 51            | 54           | 51             | 53            |
| # contigs ( $\geq 25000$ bp)    | 49            | 47         | 49            | 48          | 47           | 48             | 48             | 46            | 48           | 46             | 46            |
| # contigs ( $\geq 50000$ bp)    | 31            | 31         | 31            | 30          | 31           | 32             | 30             | 28            | 30           | 28             | 29            |
| Total length ( $\geq 0$ bp)     | 4592120       | 4872509    | 4554459       | 5034288     | 5148745      | 5301868        | 5248314        | 5234472       | 4721486      | <b>5364848</b> | 4399093       |
| Total length ( $\geq 1000$ bp)  | 4531525       | 4797173    | 4487930       | 4982888     | 5091870      | 5233985        | 5207238        | 5173957       | 4651894      | <b>5297842</b> | 4362699       |
| Total length ( $\geq 5000$ bp)  | 4487709       | 4759362    | 4451693       | 4945793     | 5055238      | 5196661        | 5166445        | 5135383       | 4613533      | <b>5259841</b> | 4314781       |
| Total length ( $\geq 10000$ bp) | 4449112       | 4716994    | 4409556       | 4896653     | 5012927      | 5139964        | 5124088        | 5093028       | 4571240      | <b>5209142</b> | 4272644       |
| Total length ( $\geq 25000$ bp) | 4337336       | 4624344    | 4317759       | 4804003     | 4935021      | 5062002        | 5046126        | 5015066       | 4478624      | <b>5131267</b> | 4151701       |
| Total length ( $\geq 50000$ bp) | 3690981       | 4050737    | 3670597       | 4157698     | 4350700      | <b>4461391</b> | 4393097        | 4369294       | 3833349      | 4455347        | 3534867       |
| # contigs                       | 94            | 88         | 89            | 89          | 82           | 88             | 82             | 84            | 87           | 88             | 85            |
| Largest contig                  | 343551        | 652557     | 411914        | 1074043     | 421583       | 652365         | <b>1172452</b> | 652461        | 652557       | 837099         | 326329        |
| Total length                    | 4542042       | 4807144    | 4497803       | 4993249     | 5099259      | 5242952        | 5213422        | 5183003       | 4660793      | <b>5308813</b> | 4369755       |
| Reference length                | 4686137       | 4686137    | 4686137       | 4686137     | 4686137      | 4686137        | 4686137        | 4686137       | 4686137      | 4686137        | 4686137       |
| GC (%)                          | 50.72         | 50.68      | 50.72         | 50.74       | 50.85        | 50.71          | 50.76          | 50.74         | 50.72        | 50.76          | 50.75         |
| Reference GC (%)                | 50.78         | 50.78      | 50.78         | 50.78       | 50.78        | 50.78          | 50.78          | 50.78         | 50.78        | 50.78          | 50.78         |
| N50                             | 97356         | 133298     | 107848        | 132162      | 158602       | 163361         | 133298         | 165875        | 122330       | <b>171773</b>  | 117698        |
| NG50                            | 95058         | 158602     | 97317         | 156704      | 163311       | 165947         | 163410         | 173935        | 122330       | <b>177622</b>  | 107823        |
| N75                             | 59899         | 62449      | 59899         | 67455       | <b>74835</b> | 70471          | 67455          | <b>74835</b>  | 59899        | <b>74835</b>   | 61504         |
| NG75                            | 57141         | 70655      | 55107         | 76722       | 88864        | 87147          | 85684          | 88864         | 59899        | <b>112586</b>  | 54707         |
| L50                             | 12            | 11         | 13            | 10          | 10           | 10             | 9              | <b>8</b>      | 11           | 9              | 12            |
| LG50                            | 13            | 10         | 14            | 8           | 9            | 9              | <b>7</b>       | <b>7</b>      | 11           | <b>7</b>       | 14            |
| L75                             | 26            | 24         | 26            | 23          | 23           | 24             | 22             | <b>20</b>     | 25           | <b>20</b>      | 25            |
| LG75                            | 28            | 22         | 29            | 20          | 19           | 18             | 17             | 16            | 25           | <b>15</b>      | 29            |
| # misassemblies                 | 3             | 5          | 4             | 5           | 8            | 8              | 6              | 7             | <b>2</b>     | 11             | 3             |
| # misassembled contigs          | 3             | 5          | 4             | 3           | 8            | 8              | 4              | 7             | <b>2</b>     | 8              | 3             |
| Misassembled contigs length     | 634863        | 1149960    | 755823        | 1310461     | 1749325      | 1874510        | 1759738        | 2375577       | 774887       | 2222845        | <b>401102</b> |
| # local misassemblies           | 14            | 3          | 6             | <b>2</b>    | 3            | 8              | 5              | <b>2</b>      | 3            | 9              | 9             |
| # structural variations         | 0             | 0          | 0             | 0           | 0            | 0              | 0              | 0             | 0            | 0              | 0             |
| # unaligned mis. contigs        | 0             | 0          | 0             | 0           | 0            | 0              | 0              | 0             | 0            | 0              | 0             |
| # unaligned contigs             | 0 + 0 part    | 0 + 0 part | 0 + 0 part    | 0 + 0 part  | 0 + 0 part   | 0 + 0 part     | 0 + 0 part     | 0 + 0 part    | 0 + 0 part   | 0 + 0 part     | 0 + 0 part    |
| Unaligned length                | 0             | 0          | 0             | 0           | 0            | 0              | 0              | 0             | 0            | 0              | 0             |
| Genome fraction (%)             | 92.370        | 92.439     | <b>93.254</b> | 92.496      | 92.422       | 92.584         | 92.419         | 92.452        | 92.424       | 92.655         | 92.391        |
| Duplication ratio               | 1.049         | 1.110      | 1.029         | 1.152       | 1.177        | 1.208          | 1.204          | 1.196         | 1.076        | 1.223          | <b>1.009</b>  |
| # N's per 100 kbp               | 41.83         | 14.56      | 22.23         | 12.02       | 25.49        | 24.80          | 21.10          | 19.29         | <b>10.73</b> | 22.60          | 27.46         |
| # mismatches per 100 kbp        | 1.85          | 1.02       | 1.21          | 0.62        | <b>0.42</b>  | 1.01           | 1.34           | 0.65          | 1.06         | 0.92           | 1.62          |
| # indels per 100 kbp            | 0.14          | 0.05       | 0.05          | <b>0.02</b> | 0.07         | 0.05           | 0.12           | 0.07          | 0.05         | <b>0.02</b>    | 0.16          |
| Largest alignment               | <b>326329</b> | 326328     | 326328        | 326129      | 326319       | 326232         | 326129         | 326328        | 326328       | 326322         | <b>326329</b> |
| Total aligned length            | 4540136       | 4806444    | 4496802       | 4992649     | 5097903      | 5241579        | 5212322        | 5182003       | 4660277      | <b>5307613</b> | 4368499       |
| NA50                            | 95058         | 112586     | 89397         | 117698      | 117685       | 117698         | <b>132162</b>  | 131963        | 117698       | 131963         | 107823        |
| NGA50                           | 92505         | 117698     | 88680         | 132162      | 133298       | 132162         | <b>156703</b>  | <b>156703</b> | 117698       | 133298         | 97317         |
| NA75                            | 57141         | 59800      | 56402         | 62449       | 62250        | 62449          | <b>67455</b>   | <b>67455</b>  | 59799        | 62449          | 56567         |
| NGA75                           | 54607         | 67455      | 54261         | 76722       | 82808        | 83023          | <b>85684</b>   | 82987         | 59799        | 82958          | 45709         |
| LA50                            | 14            | 13         | 14            | 13          | 14           | 14             | 13             | 13            | <b>12</b>    | 14             | 13            |
| LGA50                           | 15            | 12         | 15            | 12          | 12           | 12             | <b>11</b>      | <b>11</b>     | 12           | 12             | 14            |
| LA75                            | 29            | 27         | 29            | 27          | 29           | 29             | 27             | 27            | <b>26</b>    | 29             | 27            |
| LGA75                           | 31            | 25         | 32            | 24          | 24           | 23             | <b>22</b>      | <b>22</b>     | 26           | 23             | 32            |

### 4.1.3 *E. coli str. K-12 substr. MG1655*

Table 8 contains the Quast report after assembling dataset *E. coli str. K-12 substr. MG1655* with DISCOVAR .

Table 8: Assembly quality metrics for *E. coli str. K-12 substr. MG1655*

| Assembly                        | Uncorrected | ACE          | BayesHammer | BFC        | BLESS2      | Blue       | Karect        | Lighter    | Musket         | RACER         | SGA-EC      |
|---------------------------------|-------------|--------------|-------------|------------|-------------|------------|---------------|------------|----------------|---------------|-------------|
| # contigs ( $\geq 0$ bp)        | 136         | 205          | 1168        | 207        | 215         | 304        | 243           | 215        | 311            | 208           | 271         |
| # contigs ( $\geq 1000$ bp)     | 124         | 77           | 608         | 105        | 90          | 92         | 82            | 95         | 87             | 88            | 207         |
| # contigs ( $\geq 5000$ bp)     | 3           | 61           | 247         | 74         | 67          | 67         | 61            | 71         | 64             | 69            | 3           |
| # contigs ( $\geq 10000$ bp)    | 0           | 54           | 133         | 69         | 57          | 59         | 55            | 63         | 54             | 62            | 0           |
| # contigs ( $\geq 25000$ bp)    | 0           | 46           | 30          | 54         | 47          | 45         | 46            | 52         | 44             | 46            | 0           |
| # contigs ( $\geq 50000$ bp)    | 0           | 30           | 4           | 35         | 31          | 31         | 32            | 37         | 30             | 31            | 0           |
| Total length ( $\geq 0$ bp)     | 236904      | 4583890      | 4673678     | 4581495    | 4582720     | 4681774    | 4816991       | 4583866    | <b>5001900</b> | 4587380       | 398754      |
| Total length ( $\geq 1000$ bp)  | 233516      | 4547305      | 4511593     | 4549381    | 4542301     | 4625105    | 4767154       | 4548075    | <b>4935390</b> | 4554309       | 380114      |
| Total length ( $\geq 5000$ bp)  | 21752       | 4503937      | 3550363     | 4463067    | 4482054     | 4556845    | 4716578       | 4490654    | <b>4877839</b> | 4502287       | 24634       |
| Total length ( $\geq 10000$ bp) | 0           | 4450193      | 2720691     | 4428272    | 4401991     | 4499387    | 4668891       | 4427303    | <b>4798997</b> | 4448767       | 0           |
| Total length ( $\geq 25000$ bp) | 0           | 4316532      | 1134734     | 4194714    | 4221717     | 4276337    | 4525945       | 4245050    | <b>4628383</b> | 4182324       | 0           |
| Total length ( $\geq 50000$ bp) | 0           | 3749345      | 256307      | 3471755    | 3672133     | 3780324    | 4057531       | 3703361    | <b>4138053</b> | 3644641       | 0           |
| # contigs                       | 124         | 82           | 624         | 111        | 102         | 99         | 96            | 103        | 99             | 94            | 210         |
| Largest contig                  | 9147        | 365228       | 73863       | 221402     | 238045      | 429293     | 471577        | 211687     | 418937         | <b>480612</b> | 9536        |
| Total length                    | 233516      | 4551290      | 4522598     | 4554385    | 4551550     | 4629907    | 4777246       | 4553997    | <b>4944315</b> | 4558950       | 382165      |
| Reference length                | 4639675     | 4639675      | 4639675     | 4639675    | 4639675     | 4639675    | 4639675       | 4639675    | 4639675        | 4639675       | 4639675     |
| GC (%)                          | 39.56       | 50.73        | 50.70       | 50.74      | 50.74       | 50.69      | 50.72         | 50.72      | 50.67          | 50.73         | 41.64       |
| Reference GC (%)                | 50.79       | 50.79        | 50.79       | 50.79      | 50.79       | 50.79      | 50.79         | 50.79      | 50.79          | 50.79         | 50.79       |
| N50                             | 1725        | 130621       | 13296       | 88143      | 112270      | 117964     | 112492        | 95324      | <b>134676</b>  | 105110        | 1743        |
| NG50                            | -           | 125346       | 12916       | 87072      | 106364      | 117964     | 117885        | 92024      | 164309         | 105110        | -           |
| N75                             | 1423        | 59654        | 5929        | 57478      | 58977       | 59666      | <b>67528</b>  | 58857      | 66071          | <b>67528</b>  | 1396        |
| NG75                            | -           | 58850        | 5266        | 49405      | 58105       | 59666      | 78892         | 57312      | 87166          | 61545         | -           |
| L50                             | 44          | 12           | 94          | 18         | 13          | 12         | 12            | 17         | <b>11</b>      | 15            | 74          |
| LG50                            | -           | 13           | 99          | 19         | 14          | 12         | 11            | 18         | 10             | 15            | -           |
| L75                             | 80          | 25           | 218         | 35         | 27          | 26         | 25            | 32         | <b>23</b>      | 27            | 135         |
| LG75                            | -           | 26           | 234         | 36         | 28          | 26         | 23            | 33         | 20             | 28            | -           |
| # misassemblies                 | <b>0</b>    | 9            | 1           | 9          | 6           | 13         | 7             | 5          | 10             | 16            | <b>0</b>    |
| # misassembled contigs          | <b>0</b>    | 7            | 1           | 7          | 6           | 6          | 7             | 5          | 9              | 12            | <b>0</b>    |
| Misassembled contigs length     | <b>0</b>    | 1135500      | 62521       | 494731     | 942233      | 1089006    | 1516331       | 510573     | 1791746        | 1387624       | <b>0</b>    |
| # local misassemblies           | <b>0</b>    | 13           | 24          | 17         | 18          | 16         | 6             | 11         | 9              | 5             | <b>0</b>    |
| # unaligned mis. contigs        | 0           | 0            | 0           | 0          | 0           | 0          | 0             | 0          | 0              | 0             | 0           |
| # unaligned contigs             | 0 + 0 part  | 0 + 0 part   | 0 + 0 part  | 0 + 0 part | 0 + 0 part  | 0 + 0 part | 0 + 0 part    | 0 + 0 part | 0 + 0 part     | 0 + 0 part    | 0 + 0 part  |
| Unaligned length                | 0           | 0            | 0           | 0          | 0           | 0          | 0             | 0          | 0              | 0             | 0           |
| Genome fraction (%)             | 5.015       | 97.960       | 95.944      | 97.913     | 97.916      | 97.741     | <b>98.317</b> | 97.985     | 98.207         | 98.097        | 8.205       |
| Duplication ratio               | 1.004       | <b>1.001</b> | 1.016       | 1.003      | 1.002       | 1.021      | 1.047         | 1.002      | 1.085          | 1.002         | 1.004       |
| # N's per 100 kbp               | <b>0.00</b> | 68.11        | 159.20      | 103.20     | 105.46      | 88.55      | 31.40         | 59.29      | 50.56          | 48.26         | <b>0.00</b> |
| # mismatches per 100 kbp        | 3.01        | 0.95         | 1.98        | 0.64       | <b>0.18</b> | 0.31       | 0.31          | 0.46       | 0.50           | 1.74          | 3.68        |
| # indels per 100 kbp            | <b>0.00</b> | 0.35         | 1.10        | 0.59       | 0.57        | 0.37       | 0.13          | 0.31       | 0.15           | 0.24          | <b>0.00</b> |
| Largest alignment               | 9147        | 268205       | 73663       | 221199     | 237845      | 209037     | <b>268448</b> | 209311     | 209518         | 209273        | 9536        |
| Total aligned length            | 233516      | 4547442      | 4514693     | 4548941    | 4546078     | 4625272    | 4775037       | 4550674    | <b>4941146</b> | 4555709       | 382165      |
| NA50                            | 1725        | 110240       | 13241       | 79327      | 95454       | 95121      | <b>112492</b> | 91824      | 112450         | 86536         | 1743        |
| NGA50                           | -           | 105571       | 12901       | 78999      | 95454       | 95121      | 112492        | 87309      | 132756         | 86536         | -           |
| NA75                            | 1423        | 58208        | 5855        | 45590      | 57827       | 56387      | <b>59588</b>  | 57312      | 58666          | 48231         | 1396        |
| NGA75                           | -           | 58094        | 5259        | 43901      | 57311       | 56387      | 63364         | 56944      | 63620          | 44021         | -           |
| LA50                            | 44          | <b>14</b>    | 96          | 19         | 16          | 17         | <b>14</b>     | 18         | 15             | 19            | 74          |
| LGA50                           | -           | 15           | 100         | 20         | 16          | 17         | 14            | 19         | 14             | 19            | -           |
| LA75                            | 80          | <b>29</b>    | 220         | 38         | 31          | 34         | <b>29</b>     | 34         | 30             | 36            | 135         |
| LGA75                           | -           | 30           | 236         | 39         | 32          | 34         | 27            | 35         | 27             | 38            | -           |



#### 4.1.4 *S. enterica*

Table 9 contains the Quast report after assembling dataset *S. enterica* with DISCOVAR .

Table 9: Assembly quality metrics for *S. enterica*

| Assembly                    | Uncorrected    | ACE            | BayesHammer   | BFC            | BLESS2      | Blue          | Karect         | Lighter        | Musket         | RACER          | SGA-EC     |
|-----------------------------|----------------|----------------|---------------|----------------|-------------|---------------|----------------|----------------|----------------|----------------|------------|
| # contigs (≥ 0 bp)          | 57             | 58             | 60            | 53             | 53          | 96            | 49             | 60             | 64             | 57             | 60         |
| # contigs (≥ 1000 bp)       | 26             | 26             | 25            | 24             | 29          | 26            | 24             | 26             | 26             | 25             | 27         |
| # contigs (≥ 5000 bp)       | 21             | 21             | 20            | 20             | 26          | 21            | 20             | 21             | 21             | 20             | 23         |
| # contigs (≥ 10000 bp)      | 20             | 20             | 19            | 18             | 24          | 20            | 18             | 20             | 20             | 20             | 21         |
| # contigs (≥ 25000 bp)      | 19             | 19             | 18            | 17             | 22          | 19            | 17             | 19             | 19             | 19             | 20         |
| # contigs (≥ 50000 bp)      | 17             | 17             | 17            | 16             | 21          | 18            | 16             | 17             | 18             | 18             | 18         |
| Total length (≥ 0 bp)       | 8163172        | 6749101        | 5393710       | 7876026        | 8740562     | 6725492       | 7983640        | 5267128        | 7690962        | <b>8827553</b> | 7139332    |
| Total length (≥ 1000 bp)    | 8152999        | 6737889        | 5382222       | 7866252        | 8732154     | 6704366       | 7974783        | 5255839        | 7596472        | <b>8815758</b> | 7127974    |
| Total length (≥ 5000 bp)    | 8138322        | 6723525        | 5367858       | 7854968        | 8723916     | 6689707       | 7963123        | 5241077        | 7581909        | <b>8801195</b> | 7116576    |
| Total length (≥ 10000 bp)   | 8132122        | 6717325        | 5361658       | 7842409        | 8711266     | 6683507       | 7950564        | 5234877        | 7575709        | <b>8801195</b> | 7104017    |
| Total length (≥ 25000 bp)   | 8121235        | 6706944        | 5351283       | 7832038        | 8669276     | 6673137       | 7939669        | 5224509        | 7565341        | <b>8780558</b> | 7093636    |
| Total length (≥ 50000 bp)   | 8037149        | 6623285        | 5313751       | 7794506        | 8631738     | 6635805       | 7902137        | 5140850        | 7527809        | <b>8741247</b> | 7009977    |
| # contigs                   | 27             | 29             | 27            | 25             | 30          | 28            | 26             | 28             | 28             | 29             | 30         |
| Largest contig              | <b>2045651</b> | <b>2045651</b> | 1022875       | <b>2045651</b> | 1059914     | 1319742       | <b>2045651</b> | 1022875        | <b>2045651</b> | 2045552        | 1227131    |
| Total length                | 8153995        | 6740191        | 5383886       | 7867248        | 8733150     | 6705863       | 7976367        | 5257503        | 7598186        | <b>8818658</b> | 7130310    |
| Reference length            | 4888768        | 4888768        | 4888768       | 4888768        | 4888768     | 4888768       | 4888768        | 4888768        | 4888768        | 4888768        | 4888768    |
| GC (%)                      | 52.02          | 51.95          | 52.18         | 52.08          | 52.10       | 52.18         | 52.06          | 52.08          | 52.00          | 52.12          | 51.99      |
| Reference GC (%)            | 52.09          | 52.09          | 52.09         | 52.09          | 52.09       | 52.09         | 52.09          | 52.09          | 52.09          | 52.09          | 52.09      |
| N50                         | <b>1128667</b> | 564383         | 471517        | 879542         | 556744      | 597403        | 879542         | 439239         | 879542         | 890143         | 492948     |
| NG50                        | 1227131        | 614042         | 471517        | 1128568        | 899660      | 879165        | 1128568        | 439239         | 1128568        | <b>1319841</b> | 1060013    |
| N75                         | 407470         | 321307         | 298751        | 439351         | 407470      | 323519        | 439318         | 231546         | 323519         | <b>597104</b>  | 321307     |
| NG75                        | <b>1128667</b> | 564383         | 321307        | 879542         | 763376      | 597403        | 879542         | 298751         | 879542         | 900602         | 492948     |
| L50                         | <b>3</b>       | 4              | 4             | <b>3</b>       | 6           | 4             | <b>3</b>       | 4              | <b>3</b>       | 4              | 4          |
| LG50                        | <b>2</b>       | <b>2</b>       | 4             | <b>2</b>       | 3           | 3             | <b>2</b>       | 4              | <b>2</b>       | <b>2</b>       | 3          |
| L75                         | 7              | 8              | 8             | 7              | 10          | 7             | 7              | 9              | 7              | <b>6</b>       | 8          |
| LG75                        | <b>3</b>       | 4              | 7             | <b>3</b>       | 4           | 4             | <b>3</b>       | 7              | <b>3</b>       | <b>3</b>       | 4          |
| # misassemblies             | 32             | 26             | <b>18</b>     | 27             | 46          | 26            | 31             | 19             | 29             | 36             | 27         |
| # misassembled contigs      | 11             | 10             | 10            | 11             | 20          | 11            | 11             | <b>9</b>       | 11             | 12             | 11         |
| Misassembled contigs length | 7380321        | 5730649        | 4495114       | 7369278        | 8485367     | 5978777       | 7476855        | <b>4086405</b> | 6776877        | 8144235        | 6117395    |
| # local misassemblies       | 6              | 9              | <b>3</b>      | 6              | 7           | 6             | 7              | 4              | 6              | 8              | 6          |
| # unaligned mis. contigs    | 0              | 0              | 0             | 0              | 0           | 0             | 0              | 0              | 0              | 0              | 0          |
| # unaligned contigs         | 3 + 4 part     | 3 + 4 part     | 3 + 4 part    | 3 + 4 part     | 3 + 4 part  | 3 + 4 part    | 3 + 4 part     | 3 + 4 part     | 3 + 4 part     | 3 + 4 part     | 3 + 4 part |
| Unaligned length            | 85006          | 84608          | <b>60978</b>  | 66482          | 91260       | 82781         | 88086          | 82781          | 84807          | 85007          | 88086      |
| Genome fraction (%)         | 96.588         | 96.583         | 96.589        | 96.590         | 90.498      | 96.560        | <b>96.605</b>  | 96.584         | 96.588         | 95.827         | 96.580     |
| Duplication ratio           | 1.709          | 1.410          | 1.127         | 1.652          | 1.953       | 1.403         | 1.670          | <b>1.096</b>   | 1.591          | 1.864          | 1.492      |
| # N's per 100 kbp           | 13.49          | 14.84          | <b>7.43</b>   | 13.98          | 38.93       | 13.42         | 16.30          | 9.51           | 13.16          | 19.28          | 14.02      |
| # mismatches per 100 kbp    | 7.71           | 7.94           | 8.03          | 7.69           | <b>6.83</b> | 8.09          | 8.91           | 7.98           | 7.54           | 8.03           | 7.48       |
| # indels per 100 kbp        | 0.47           | <b>0.36</b>    | 0.38          | 0.40           | 0.38        | 0.38          | 1.06           | <b>0.36</b>    | <b>0.36</b>    | 0.38           | 0.49       |
| Largest alignment           | <b>453219</b>  | <b>453219</b>  | <b>453219</b> | <b>453219</b>  | 383351      | <b>453219</b> | <b>453219</b>  | <b>453219</b>  | <b>453219</b>  | <b>453219</b>  | 385791     |
| Total aligned length        | 8068080        | 6654783        | 5322508       | 7799766        | 8638780     | 6622282       | 7887181        | 5174322        | 7512575        | <b>8732343</b> | 7041424    |
| NA50                        | <b>231546</b>  | 216238         | 216238        | 231347         | 175570      | 215208        | 231347         | 215202         | <b>231546</b>  | 216238         | 215202     |
| NGA50                       | <b>349181</b>  | 339455         | 231546        | 348982         | 297351      | 271281        | 339455         | 216238         | 339455         | 339455         | 339455     |
| NA75                        | 140342         | 134245         | 106253        | <b>161809</b>  | 109398      | 117146        | 161610         | 106253         | 161610         | 140241         | 133818     |
| NGA75                       | <b>235808</b>  | 215202         | 161809        | 231546         | 195759      | 180274        | 231546         | 134245         | 231546         | 235198         | 215202     |
| LA50                        | 12             | 10             | <b>9</b>      | 12             | 17          | 11            | 12             | <b>9</b>       | 11             | 14             | 12         |
| LGA50                       | <b>7</b>       | <b>7</b>       | 8             | <b>7</b>       | 8           | <b>7</b>      | <b>7</b>       | 8              | <b>7</b>       | <b>7</b>       | <b>7</b>   |
| LA75                        | 23             | 20             | <b>17</b>     | 22             | 32          | 21            | 23             | <b>17</b>      | 21             | 26             | 22         |
| LGA75                       | <b>10</b>      | 12             | 14            | 11             | 13          | 13            | 11             | 15             | 11             | 11             | 12         |

#### 4.1.5 *P. aeruginosa*

Table 10 contains the Quast report after assembling dataset *P. aeruginosa* with DISCOVAR .

Table 10: Assembly quality metrics for *P. aeruginosa*

| Assembly                    | Uncorrected  | ACE         | BayesHammer | BFC             | BLESS2          | Blue           | Karect          | Lighter    | Musket     | RACER         | SGA-EC            |
|-----------------------------|--------------|-------------|-------------|-----------------|-----------------|----------------|-----------------|------------|------------|---------------|-------------------|
| # contigs (≥ 0 bp)          | 235          | 257         | 214         | 237             | 285             | 155            | 248             | 175        | 208        | 235           | 198               |
| # contigs (≥ 1000 bp)       | 100          | 58          | 63          | 51              | 98              | 46             | 59              | 70         | 56         | 66            | 78                |
| # contigs (≥ 5000 bp)       | 86           | 43          | 49          | 39              | 79              | 36             | 46              | 53         | 46         | 50            | 64                |
| # contigs (≥ 10000 bp)      | 86           | 43          | 47          | 39              | 79              | 35             | 46              | 53         | 46         | 50            | 63                |
| # contigs (≥ 25000 bp)      | 75           | 40          | 46          | 36              | 69              | 33             | 43              | 48         | 42         | 44            | 58                |
| # contigs (≥ 50000 bp)      | 60           | 39          | 44          | 34              | 58              | 32             | 42              | 45         | 41         | 42            | 51                |
| Total length (≥ 0 bp)       | 11625729     | 11634936    | 10503702    | 10420741        | <b>12042989</b> | 11140745       | 11989806        | 11767482   | 11524362   | 11873579      | 10961929          |
| Total length (≥ 1000 bp)    | 11582521     | 11575379    | 10456654    | 10365266        | <b>11986568</b> | 11108207       | 11932686        | 11734935   | 11477897   | 11822085      | 10924088          |
| Total length (≥ 5000 bp)    | 11551657     | 11542556    | 10428297    | 10338168        | <b>11935032</b> | 11084356       | 11903187        | 11700878   | 11453202   | 11787070      | 10891866          |
| Total length (≥ 10000 bp)   | 11551657     | 11542556    | 10417440    | 10338168        | <b>11935032</b> | 11077115       | 11903187        | 11700878   | 11453202   | 11787070      | 10886855          |
| Total length (≥ 25000 bp)   | 11383796     | 11509234    | 10406408    | 10304846        | 11770514        | 11054584       | <b>11869865</b> | 11644056   | 11394722   | 11704610      | 10800207          |
| Total length (≥ 50000 bp)   | 10849911     | 11477737    | 10343168    | 10230546        | 11371155        | 11022244       | <b>11838368</b> | 11541634   | 11363225   | 11636822      | 10559422          |
| # contigs                   | 112          | 74          | 77          | 66              | 113             | 53             | 74              | 81         | 71         | 79            | 89                |
| Largest contig              | 555743       | 950726      | 758235      | 1712382         | 1099014         | <b>1712467</b> | 1101178         | 1099225    | 1101178    | 1101178       | 727357            |
| Total length                | 11590443     | 11585582    | 10465902    | 10374758        | <b>11996711</b> | 11113273       | 11942534        | 11742174   | 11487346   | 11830623      | 10931407          |
| Reference length            | 6264404      | 6264404     | 6264404     | 6264404         | 6264404         | 6264404        | 6264404         | 6264404    | 6264404    | 6264404       | 6264404           |
| GC (%)                      | 66.55        | 66.58       | 66.53       | 66.58           | 66.58           | 66.57          | 66.55           | 66.59      | 66.61      | 66.55         | 66.56             |
| Reference GC (%)            | 66.56        | 66.56       | 66.56       | 66.56           | 66.56           | 66.56          | 66.56           | 66.56      | 66.56      | 66.56         | 66.56             |
| N50                         | 226123       | 475847      | 336413      | 509581          | 233095          | 436693         | 457755          | 354411     | 365189     | <b>578979</b> | 253019            |
| NG50                        | 353311       | 651197      | 488647      | 760385          | 655399          | <b>776261</b>  | 580931          | 580931     | 697483     | 727189        | 457723            |
| N75                         | 127449       | 231991      | 188258      | 232707          | 133440          | <b>238833</b>  | 230657          | 232839     | 233095     | 221660        | 137433            |
| NG75                        | 257909       | 582785      | 364869      | 574308          | 356909          | 651944         | 526453          | 376883     | 595827     | <b>656305</b> | 329577            |
| L50                         | 18           | 9           | 11          | 7               | 13              | 7              | 10              | 11         | 9          | 8             | 13                |
| LG50                        | 8            | 4           | 5           | 3               | 4               | 3              | 4               | 4          | 4          | 4             | 6                 |
| L75                         | 34           | 18          | 21          | 15              | 29              | 15             | 19              | 21         | 18         | 18            | 27                |
| LG75                        | 13           | 7           | 9           | 6               | 8               | 5              | 7               | 8          | 6          | 6             | 10                |
| # misassemblies             | 88           | 45          | 51          | 44              | 83              | <b>43</b>      | 51              | 54         | 50         | 54            | 62                |
| # misassembled contigs      | 85           | 43          | 47          | 39              | 79              | <b>35</b>      | 46              | 52         | 45         | 50            | 62                |
| Misassembled contigs length | 11373850     | 11542556    | 10417440    | <b>10338168</b> | 11935032        | 11077115       | 11903187        | 11583348   | 11333515   | 11787070      | 10864735          |
| # local misassemblies       | 9            | 7           | 2           | 2               | 11              | 16             | 4               | 4          | 3          | 2             | 6                 |
| # unaligned mis. contigs    | 0            | 0           | 0           | 0               | 0               | 0              | 0               | 0          | 0          | 0             | 0                 |
| # unaligned contigs         | 0 + 1 part   | 0 + 1 part  | 0 + 1 part  | 0 + 1 part      | 0 + 1 part      | 0 + 1 part     | 0 + 1 part      | 0 + 1 part | 0 + 1 part | 0 + 1 part    | <b>0 + 0 part</b> |
| Unaligned length            | 20158        | 20258       | 20258       | 20258           | 20258           | 20358          | 20258           | 20258      | 20258      | 20258         | <b>0</b>          |
| Genome fraction (%)         | 94.090       | 92.618      | 83.725      | 82.911          | <b>96.082</b>   | 88.807         | 95.430          | 94.785     | 92.714     | 94.584        | 87.741            |
| Duplication ratio           | <b>1.963</b> | 1.993       | 1.992       | 1.994           | 1.990           | 1.994          | 1.994           | 1.974      | 1.974      | 1.993         | 1.989             |
| # N's per 100 kbp           | 74.20        | 39.70       | 45.86       | 38.56           | 78.35           | <b>35.09</b>   | 42.70           | 44.28      | 40.91      | 43.95         | 55.80             |
| # mismatches per 100 kbp    | 0.78         | <b>0.59</b> | 0.93        | 0.83            | 0.88            | 1.73           | 0.85            | 0.74       | 1.31       | 0.71          | 0.73              |
| # indels per 100 kbp        | 0.64         | 0.72        | 0.78        | <b>0.62</b>     | 0.83            | 0.88           | 0.84            | 0.66       | 0.77       | 0.74          | 0.80              |
| Largest alignment           | 277921       | 475263      | 379167      | 856091          | 549407          | <b>856283</b>  | 550788          | 549662     | 550788     | 550788        | 363728            |
| Total aligned length        | 11561645     | 11560824    | 10440921    | 10350599        | <b>11967149</b> | 11089016       | 11917271        | 11716808   | 11461927   | 11805252      | 10925274          |
| NA50                        | 112912       | 237774      | 168256      | 188488          | 115225          | 188311         | 228927          | 177255     | 182644     | <b>289340</b> | 126360            |
| NGA50                       | 177807       | 325449      | 244174      | <b>380043</b>   | 277543          | 349328         | 290316          | 290316     | 348592     | 363445        | 228712            |
| NA75                        | 61958        | 112823      | 91289       | 111071          | 63883           | <b>115483</b>  | 110730          | 100361     | 109533     | 100505        | 68567             |
| NGA75                       | 130009       | 291243      | 182283      | 254840          | 178305          | 218396         | 263077          | 188491     | 297764     | <b>328003</b> | 164639            |
| LA50                        | 35           | 18          | 21          | <b>13</b>       | 26              | 16             | 19              | 21         | 17         | 16            | 26                |
| LGA50                       | 15           | 8           | 10          | <b>6</b>        | 9               | <b>6</b>       | 8               | 8          | 8          | 8             | 12                |
| LA75                        | 68           | 36          | 42          | <b>30</b>       | 61              | 34             | 39              | 42         | 36         | 36            | 54                |
| LGA75                       | 25           | 14          | 18          | <b>11</b>       | 16              | 12             | 14              | 15         | 12         | 12            | 20                |

#### 4.1.6 *H. sapiens* Chr. 21

Table 11 contains the Quast report after assembling dataset *H. sapiens* Chr. 21 with DISCOVAR .

Table 11: Assembly quality metrics for *H. sapiens* Chr. 21

| Assembly                        | Uncorrected  | ACE         | BayesHammer  | BFC           | BLESS2       | Blue              | Karect       | Lighter      | Musket       | RACER      | SGA-EC       |
|---------------------------------|--------------|-------------|--------------|---------------|--------------|-------------------|--------------|--------------|--------------|------------|--------------|
| # contigs ( $\geq 0$ bp)        | 27142        | 28951       | 27677        | 30461         | 27602        | 31994             | 29444        | 28813        | 28902        | 29266      | 28622        |
| # contigs ( $\geq 1000$ bp)     | 8724         | 8872        | 8615         | 8922          | 8659         | 8846              | 8956         | 8854         | 8903         | 8966       | 8830         |
| # contigs ( $\geq 5000$ bp)     | 291          | 300         | 300          | 358           | 295          | 385               | 313          | 308          | 311          | 313        | 301          |
| # contigs ( $\geq 10000$ bp)    | 45           | 51          | 45           | 72            | 50           | 85                | 52           | 54           | 50           | 55         | 55           |
| # contigs ( $\geq 25000$ bp)    | 2            | 2           | 3            | 5             | 4            | 4                 | 3            | 3            | 3            | 2          | 3            |
| # contigs ( $\geq 50000$ bp)    | 0            | 0           | 0            | 0             | 0            | 0                 | 0            | 0            | 0            | 0          | 0            |
| Total length ( $\geq 0$ bp)     | 23408496     | 24205535    | 23398741     | 25197489      | 23563324     | <b>25978783</b>   | 24713094     | 24238862     | 24388697     | 24638523   | 24099519     |
| Total length ( $\geq 1000$ bp)  | 18534837     | 18873907    | 18350432     | 19502701      | 18544529     | <b>19856763</b>   | 19251190     | 18939574     | 19071438     | 19245204   | 18855664     |
| Total length ( $\geq 5000$ bp)  | 2236239      | 2390389     | 2345949      | 2943213       | 2358076      | <b>3238607</b>    | 2509559      | 2460569      | 2447363      | 2507608    | 2409899      |
| Total length ( $\geq 10000$ bp) | 657387       | 772745      | 689726       | 1107992       | 789211       | <b>1277133</b>    | 814402       | 824225       | 769572       | 846768     | 824665       |
| Total length ( $\geq 25000$ bp) | 58348        | 59509       | 8445         | <b>154711</b> | 119213       | 121978            | 85547        | 85543        | 84420        | 59716      | 85544        |
| Total length ( $\geq 50000$ bp) | 0            | 0           | 0            | 0             | 0            | 0                 | 0            | 0            | 0            | 0          | 0            |
| # contigs                       | 8925         | 9108        | 8816         | 9142          | 8844         | 9092              | 9209         | 9079         | 9132         | 9197       | 9037         |
| Largest contig                  | 30142        | 31299       | 30202        | <b>36962</b>  | 32650        | 33532             | 31299        | 31300        | 30195        | 31488      | 31299        |
| Total length                    | 18682551     | 19045980    | 18496737     | 19660516      | 18683473     | <b>20033594</b>   | 19441662     | 19105744     | 19242695     | 19415777   | 19007561     |
| Reference length                | 46709983     | 46709983    | 46709983     | 46709983      | 46709983     | 46709983          | 46709983     | 46709983     | 46709983     | 46709983   | 46709983     |
| GC (%)                          | 39.74        | 39.97       | 39.70        | 40.18         | 39.65        | 40.44             | 40.00        | 39.95        | 40.00        | 40.00      | 39.91        |
| Reference GC (%)                | 42.22        | 42.22       | 42.22        | 42.22         | 42.22        | 42.22             | 42.22        | 42.22        | 42.22        | 42.22      | 42.22        |
| N50                             | 2151         | 2158        | 2166         | 2227          | 2184         | <b>2314</b>       | 2187         | 2173         | 2179         | 2182       | 2171         |
| N75                             | 1533         | 1522        | 1529         | 1548          | 1537         | <b>1576</b>       | 1538         | 1529         | 1536         | 1537       | 1532         |
| L50                             | 2674         | 2686        | 2610         | 2611          | 2615         | <b>2517</b>       | 2701         | 2669         | 2689         | 2695       | 2665         |
| L75                             | 5266         | 5335        | 5178         | 5282          | 5186         | <b>5171</b>       | 5374         | 5312         | 5343         | 5370       | 5299         |
| # misassemblies                 | 7            | <b>5</b>    | <b>5</b>     | 6             | <b>5</b>     | <b>5</b>          | <b>5</b>     | 7            | <b>5</b>     | 10         | 8            |
| # misassembled contigs          | 7            | <b>5</b>    | <b>5</b>     | 6             | <b>5</b>     | <b>5</b>          | <b>5</b>     | 7            | <b>5</b>     | 10         | 8            |
| Misassembled contigs length     | 11595        | <b>7184</b> | 7866         | 21301         | 7237         | 32262             | 16937        | 22039        | 19282        | 36377      | 35449        |
| # local misassemblies           | 39           | 40          | <b>33</b>    | 60            | 47           | 56                | 42           | 35           | 40           | 52         | 36           |
| # structural variations         | 0            | 0           | 0            | 0             | 0            | 0                 | 0            | 0            | 0            | 0          | 0            |
| # unaligned mis. contigs        | <b>0</b>     | <b>0</b>    | <b>0</b>     | <b>0</b>      | <b>0</b>     | <b>0</b>          | 1            | <b>0</b>     | <b>0</b>     | <b>0</b>   | <b>0</b>     |
| # unaligned contigs             | 11 + 1 part  | 9 + 2 part  | 5 + 1 part   | 8 + 3 part    | 5 + 4 part   | <b>4 + 2 part</b> | 9 + 4 part   | 11 + 3 part  | 7 + 2 part   | 7 + 4 part | 7 + 2 part   |
| Unaligned length                | 13200        | 12644       | 6862         | 12574         | 10467        | <b>5235</b>       | 14528        | 14858        | 12580        | 12369      | 11621        |
| Genome fraction (%)             | 39.758       | 40.515      | 39.397       | 41.844        | 39.795       | <b>42.658</b>     | 41.365       | 40.658       | 40.951       | 41.310     | 40.459       |
| Duplication ratio               | <b>1.005</b> | 1.006       | <b>1.005</b> | <b>1.005</b>  | <b>1.005</b> | <b>1.005</b>      | <b>1.005</b> | <b>1.005</b> | <b>1.005</b> | 1.006      | <b>1.005</b> |
| # N's per 100 kbp               | <b>11.24</b> | 13.13       | 14.06        | 21.36         | 15.52        | 22.46             | 13.89        | 13.61        | 12.99        | 15.97      | 13.68        |
| # mismatches per 100 kbp        | 86.72        | 86.79       | 86.70        | 88.20         | 86.67        | 88.13             | 87.61        | 87.28        | 87.45        | 89.43      | <b>86.12</b> |
| # indels per 100 kbp            | 18.62        | 18.87       | <b>18.26</b> | 19.58         | 18.36        | 18.56             | 19.36        | 18.86        | 18.86        | 19.26      | 18.82        |
| Largest alignment               | 29939        | 31199       | 30002        | <b>36761</b>  | 32348        | 33332             | 31199        | 31200        | 30095        | 31388      | 31199        |
| Total aligned length            | 18662994     | 19026207    | 18481892     | 19637168      | 18665168     | <b>20017474</b>   | 19419142     | 19083052     | 19222660     | 19393898   | 18988684     |
| NA50                            | 2149         | 2156        | 2165         | 2225          | 2183         | <b>2313</b>       | 2186         | 2172         | 2178         | 2180       | 2169         |
| NGA50                           | -            | -           | -            | -             | -            | -                 | -            | -            | -            | -          | -            |
| NA75                            | 1531         | 1520        | 1528         | 1544          | 1533         | <b>1574</b>       | 1536         | 1526         | 1533         | 1533       | 1529         |
| LA50                            | 2676         | 2688        | 2612         | 2615          | 2617         | <b>2522</b>       | 2704         | 2672         | 2692         | 2700       | 2669         |
| LA75                            | 5270         | 5339        | 5182         | 5290          | 5190         | <b>5179</b>       | 5379         | 5319         | 5349         | 5378       | 5305         |

#### 4.1.7 *C. elegans*

Table 12 contains the Quast report after assembling dataset *C. elegans* with DISCOVAR .

Table 12: Assembly quality metrics for *C. elegans*

| Assembly                    | Uncorrected    | ACE            | BayesHammer    | BFC             | BLESS2         | Blue                  | Karect          | Lighter        | Musket         | RACER          | SGA-EC         |
|-----------------------------|----------------|----------------|----------------|-----------------|----------------|-----------------------|-----------------|----------------|----------------|----------------|----------------|
| # contigs (≥ 0 bp)          | 33879          | 35629          | 34072          | 34338           | 34851          | 36053                 | 35285           | 34300          | 34770          | 37198          | 34010          |
| # contigs (≥ 1000 bp)       | 27381          | 27222          | 27337          | 26996           | 27904          | 26458                 | 27217           | 27363          | 27294          | 27887          | 27244          |
| # contigs (≥ 5000 bp)       | 3874           | 3685           | 3893           | 4101            | 3041           | 4098                  | 4012            | 3840           | 3723           | 3391           | 3989           |
| # contigs (≥ 10000 bp)      | 584            | 588            | 616            | 689             | 411            | 768                   | 672             | 595            | 574            | 497            | 648            |
| # contigs (≥ 25000 bp)      | 23             | 28             | 25             | 33              | 17             | 61                    | 31              | 24             | 24             | 22             | 28             |
| # contigs (≥ 50000 bp)      | 1              | 1              | 1              | 3               | 3              | 6                     | 2               | 1              | 1              | 1              | 1              |
| Total length (≥ 0 bp)       | 88711959       | 88080769       | 89019134       | 90477027        | 83674565       | <b>90945967</b>       | 90382710        | 88648128       | 87898196       | 87242922       | 89720536       |
| Total length (≥ 1000 bp)    | 86109765       | 84805863       | 86321966       | <b>87577530</b> | 80876971       | 87415714              | 87218441        | 85875614       | 84947836       | 83429141       | 87003150       |
| Total length (≥ 5000 bp)    | 30047522       | 28818579       | 30349677       | 32512747        | 23082132       | <b>33990281</b>       | 31726003        | 29867219       | 28965455       | 26124308       | 31301586       |
| Total length (≥ 10000 bp)   | 8115815        | 8324546        | 8544789        | 9742241         | 5873440        | <b>11724956</b>       | 9576884         | 8347025        | 8049310        | 7028244        | 9090758        |
| Total length (≥ 25000 bp)   | 716932         | 885165         | 797767         | 1060134         | 668624         | <b>2171500</b>        | 1080069         | 780103         | 766392         | 698925         | 898180         |
| Total length (≥ 50000 bp)   | 54399          | 57601          | 54393          | 164608          | 248925         | <b>471404</b>         | 174936          | 54399          | 54399          | 57601          | 54399          |
| # contigs                   | 28936          | 29090          | 28958          | 28685           | 29587          | <b>28212</b>          | 29020           | 29012          | 29008          | 30336          | 28871          |
| Largest contig              | 54399          | 57601          | 54393          | 57890           | 108677         | <b>115103</b>         | 115103          | 54399          | 54399          | 57601          | 54399          |
| Total length                | 87209529       | 86131218       | 87468860       | <b>88775004</b> | 82072189       | 88602798              | 88498583        | 87045920       | 86166399       | 85171657       | 88159881       |
| Reference length            | 100286070      | 100286070      | 100286070      | 100286070       | 100286070      | 100286070             | 100286070       | 100286070      | 100286070      | 100286070      | 100286070      |
| GC (%)                      | 38.03          | 38.41          | 38.06          | 38.27           | 38.35          | 38.35                 | 38.13           | 38.18          | 38.27          | 38.34          | 38.12          |
| Reference GC (%)            | 35.44          | 35.44          | 35.44          | 35.44           | 35.44          | 35.44                 | 35.44           | 35.44          | 35.44          | 35.44          | 35.44          |
| N50                         | 3687           | 3628           | 3707           | 3860            | 3283           | <b>3935</b>           | 3777            | 3668           | 3635           | 3430           | 3775           |
| NG50                        | 3192           | 3086           | 3213           | 3388            | 2669           | <b>3429</b>           | 3310            | 3165           | 3097           | 2904           | 3289           |
| N75                         | 2238           | 2202           | 2241           | 2296            | 2047           | <b>2311</b>           | 2265            | 2225           | 2204           | 2094           | 2265           |
| NG75                        | 1707           | 1641           | 1719           | <b>1809</b>     | 1416           | 1808                  | 1775            | 1695           | 1642           | 1536           | 1765           |
| L50                         | 7038           | 7047           | 7009           | 6811            | 7521           | <b>6433</b>           | 6900            | 7038           | 7050           | 7400           | 6936           |
| LG50                        | 8944           | 9165           | 8866           | 8405            | 10603          | <b>8017</b>           | 8566            | 8981           | 9159           | 9797           | 8658           |
| L75                         | 14674          | 14720          | 14642          | 14312           | 15484          | <b>13839</b>          | 14510           | 14704          | 14716          | 15387          | 14523          |
| LG75                        | 19700          | 20305          | 19539          | 18540           | 23504          | <b>18096</b>          | 18916           | 19820          | 20284          | 21714          | 19071          |
| # misassemblies             | <b>113</b>     | 141            | 114            | 130             | 121            | 141                   | 149             | 117            | 120            | 915            | 116            |
| # misassembled contigs      | <b>105</b>     | 137            | 108            | 124             | 119            | 138                   | 145             | 112            | 116            | 894            | 111            |
| Misassembled contigs length | 965372         | 1074547        | 889920         | 1049107         | 989929         | 1155666               | 1240877         | 912972         | <b>882752</b>  | 2312963        | 958991         |
| # local misassemblies       | 90             | 92             | 96             | 89              | 93             | <b>79</b>             | 87              | 86             | 85             | 118            | 91             |
| # unaligned mis. contigs    | <b>3</b>       | <b>2</b>       | <b>2</b>       | <b>5</b>        | <b>3</b>       | <b>2</b>              | <b>3</b>        | <b>2</b>       | <b>2</b>       | <b>2</b>       | <b>3</b>       |
| # unaligned contigs         | 3929 + 37 part | 3966 + 36 part | 3895 + 34 part | 3636 + 38 part  | 4009 + 33 part | <b>3130 + 34 part</b> | 3936 + 38 part  | 3935 + 37 part | 3948 + 35 part | 3988 + 43 part | 3879 + 36 part |
| Unaligned length            | 10018419       | 10738295       | 10217534       | 11068366        | <b>9903052</b> | 11424350              | 10691877        | 10453916       | 10459102       | 10525274       | 10518396       |
| Genome fraction (%)         | 76.482         | 74.634         | 76.543         | 76.947          | 71.452         | 76.381                | <b>76.965</b>   | 75.919         | 75.037         | 73.737         | 76.931         |
| Duplication ratio           | <b>1.006</b>   | 1.007          | <b>1.006</b>   | 1.007           | 1.007          | 1.008                 | <b>1.008</b>    | <b>1.006</b>   | <b>1.006</b>   | 1.009          | <b>1.006</b>   |
| # N's per 100 kbp           | 8.14           | 9.98           | 8.35           | 10.03           | 10.23          | 13.65                 | 11.30           | 8.16           | <b>7.89</b>    | 8.34           | 9.53           |
| # mismatches per 100 kbp    | <b>4.25</b>    | 8.39           | 4.38           | 4.60            | 4.87           | 5.48                  | 5.24            | 13.21          | 15.35          | 14.20          | <b>4.25</b>    |
| # indels per 100 kbp        | 2.87           | 3.10           | <b>2.61</b>    | 2.83            | 2.63           | 3.07                  | 3.01            | 3.09           | 3.19           | 4.08           | 2.91           |
| Largest alignment           | <b>27606</b>   | 25320          | 25354          | <b>27606</b>    | 25315          | <b>27606</b>          | <b>27606</b>    | <b>27606</b>   | 25347          | 25347          | <b>27606</b>   |
| Total aligned length        | 77165313       | 75351336       | 77225216       | 77677096        | 72141274       | 77206533              | <b>77775255</b> | 76561502       | 75676690       | 74548243       | 77616090       |
| NA50                        | 3269           | 3124           | 3257           | 3254            | 2886           | 3208                  | 3278            | 3203           | 3158           | 2955           | <b>3284</b>    |
| NGA50                       | 2786           | 2613           | 2785           | 2830            | 2303           | 2777                  | <b>2837</b>     | 2715           | 2643           | 2433           | 2834           |
| NA75                        | <b>1818</b>    | 1742           | 1809           | 1788            | 1681           | 1753                  | 1800            | 1787           | 1766           | 1656           | 1810           |
| NGA75                       | 1274           | 633            | 1276           | <b>1301</b>     | -              | 1266                  | <b>1301</b>     | 1236           | 994            | -              | 1298           |
| LA50                        | <b>7909</b>    | 8188           | 7952           | 8052            | 8538           | 8097                  | 7970            | 8039           | 8094           | 8586           | 7941           |
| LGA50                       | 10073          | 10664          | 10077          | 9946            | 12076          | 10042                 | <b>9903</b>     | 10282          | 10535          | 11408          | 9928           |
| LA75                        | <b>16849</b>   | 17423          | 16957          | 17253           | 17870          | 17439                 | 17081           | 17152          | 17226          | 18240          | 16977          |
| LGA75                       | 23261          | 24993          | 23256          | 22895           | -              | 23267                 | <b>22838</b>    | 23799          | 24516          | -              | 22887          |

#### 4.1.8 *D. melanogaster*

Table 13 contains the Quast report after assembling dataset *D. melanogaster* with DISCOVAR .

Table 13: Assembly quality metrics for *D. melanogaster*

| Assembly                    | Uncorrected     | ACE             | BayesHammer     | BFC              | BLESS2          | Blue             | Karect           | Lighter         | Musket          | RACER           | SGA-EC                 |
|-----------------------------|-----------------|-----------------|-----------------|------------------|-----------------|------------------|------------------|-----------------|-----------------|-----------------|------------------------|
| # contigs (≥ 0 bp)          | 27260           | 30244           | 29569           | 27393            | 28469           | 21402            | 25185            | 28576           | 24938           | 26720           | 28174                  |
| # contigs (≥ 1000 bp)       | 12634           | 14793           | 14325           | 12449            | 21034           | 10019            | 13299            | 13371           | 13790           | 15317           | 13061                  |
| # contigs (≥ 5000 bp)       | 4940            | 5340            | 5242            | 4864             | 5765            | 4093             | 4965             | 5093            | 5172            | 5268            | 5046                   |
| # contigs (≥ 10000 bp)      | 2986            | 3026            | 2979            | 2946             | 2574            | 2690             | 2968             | 3023            | 3022            | 2934            | 2970                   |
| # contigs (≥ 25000 bp)      | 1136            | 1030            | 1065            | 1165             | 515             | 1256             | 1166             | 1125            | 1099            | 1024            | 1150                   |
| # contigs (≥ 50000 bp)      | 364             | 242             | 286             | 378              | 54              | 504              | 323              | 318             | 273             | 243             | 328                    |
| Total length (≥ 0 bp)       | 122045333       | 122366187       | 122006358       | <b>122808874</b> | 114602943       | 121557134        | 121827634        | 122473174       | 120004005       | 120942507       | 122466576              |
| Total length (≥ 1000 bp)    | 117164542       | 117232929       | 116938531       | 117847855        | 112114552       | 117816277        | <b>117894949</b> | 117394289       | 116463039       | 117195927       | 117387138              |
| Total length (≥ 5000 bp)    | 97048788        | 92303485        | 92940657        | 97807043         | 71943304        | <b>102159157</b> | 95701726         | 95560675        | 93443597        | 90424200        | 96364085               |
| Total length (≥ 10000 bp)   | 83408784        | 76258640        | 77232839        | 84501065         | 50210781        | <b>92385558</b>  | 81803352         | 81166940        | 78545771        | 74170057        | 81868999               |
| Total length (≥ 25000 bp)   | 53624596        | 44485080        | 46772910        | 55830709         | 18559399        | <b>68976793</b>  | 52576273         | 50764105        | 47763708        | 43698411        | 52402012               |
| Total length (≥ 50000 bp)   | 26851850        | 17448614        | 19919080        | 28437865         | 3330371         | <b>42383546</b>  | 23590856         | 22668748        | 19399922        | 16853382        | 23001384               |
| # contigs                   | 13973           | 16228           | 15743           | 13841            | 21908           | 11072            | 14427            | 14800           | 14729           | 16459           | 14508                  |
| Largest contig              | 212522          | 159060          | 187339          | 225726           | 91562           | <b>368590</b>    | 198380           | 198532          | 171899          | 198165          | 181461                 |
| Total length                | 118112708       | 118217885       | 117934833       | <b>118830170</b> | 112727088       | 118562819        | 118699015        | 118403026       | 117124660       | 118001344       | 118409815              |
| Reference length            | 120381546       | 120381546       | 120381546       | 120381546        | 120381546       | 120381546        | 120381546        | 120381546       | 120381546       | 120381546       | 120381546              |
| GC (%)                      | 42.44           | 42.49           | 42.44           | 42.45            | 42.65           | 42.48            | 42.44            | 42.45           | 42.53           | 42.50           | 42.45                  |
| Reference GC (%)            | 42.42           | 42.42           | 42.42           | 42.42            | 42.42           | 42.42            | 42.42            | 42.42           | 42.42           | 42.42           | 42.42                  |
| N50                         | 22091           | 17377           | 18249           | 22788            | 8075            | <b>33082</b>     | 21345            | 20330           | 19153           | 16735           | 21287                  |
| NG50                        | 21451           | 16988           | 17561           | 22303            | 7119            | <b>32109</b>     | 20764            | 19863           | 18358           | 16199           | 20838                  |
| N75                         | 7864            | 5805            | 6121            | 7934             | 3744            | <b>12284</b>     | 7079             | 6997            | 6524            | 5360            | 7320                   |
| NG75                        | 7184            | 5389            | 5567            | 7502             | 3214            | <b>11308</b>     | 6643             | 6479            | 5776            | 5016            | 6759                   |
| L50                         | 1368            | 1739            | 1642            | 1316             | 3263            | <b>919</b>       | 1460             | 1500            | 1593            | 1775            | 1448                   |
| LG50                        | 1420            | 1801            | 1710            | 1350             | 3769            | <b>947</b>       | 1500             | 1550            | 1680            | 1847            | 1495                   |
| L75                         | 3573            | 4664            | 4421            | 3464             | 8671            | <b>2377</b>      | 3827             | 3935            | 4182            | 4894            | 3779                   |
| LG75                        | 3800            | 4949            | 4736            | 3614             | 10327           | <b>2493</b>      | 4011             | 4156            | 4580            | 5241            | 3989                   |
| # misassemblies             | 901             | 1017            | 999             | 1021             | 1092            | <b>983</b>       | 1016             | 993             | 1011            | 1250            | 988                    |
| # misassembled contigs      | 903             | 932             | 914             | 923              | 1033            | <b>867</b>       | 927              | 901             | 927             | 1132            | 900                    |
| Misassembled contigs length | 20252411        | 15883432        | 15918142        | 19834439         | <b>9381705</b>  | 27249040         | 18786258         | 17767341        | 16760517        | 19442961        | 18461236               |
| # local misassemblies       | 1907            | 1879            | 1896            | 1840             | <b>1763</b>     | 1835             | 1811             | 1838            | 1883            | 1821            | 1852                   |
| # unaligned mis. contigs    | 109             | 111             | 105             | 122              | <b>65</b>       | 82               | 100              | 110             | 84              | 100             | 109                    |
| # unaligned contigs         | 1269 + 844 part | 1303 + 859 part | 1310 + 840 part | 1283 + 861 part  | 1308 + 624 part | 1290 + 691 part  | 1257 + 879 part  | 1272 + 848 part | 1314 + 756 part | 1303 + 869 part | <b>1250 + 867 part</b> |
| Unaligned length            | 5979319         | 5979218         | 6019433         | 6131439          | <b>4567032</b>  | 5380727          | 6035967          | 6027963         | 5434932         | 5734625         | 6056066                |
| Genome fraction (%)         | 92.002          | 91.859          | 91.758          | 92.304           | 88.732          | <b>92.553</b>    | 92.363           | 92.076          | 91.677          | 91.737          | 92.023                 |
| Duplication ratio           | <b>1.012</b>    | 1.015           | 1.013           | 1.014            | 1.013           | 1.016            | 1.013            | 1.014           | <b>1.012</b>    | 1.017           | 1.014                  |
| # N's per 100 kbp           | 205.23          | 212.86          | 213.51          | 215.52           | <b>170.23</b>   | 200.74           | 241.03           | 210.13          | 224.80          | 224.40          | 201.84                 |
| # mismatches per 100 kbp    | 543.91          | 546.01          | 543.28          | 545.31           | <b>542.17</b>   | 545.48           | 547.20           | 545.75          | 551.17          | 548.97          | 544.36                 |
| # indels per 100 kbp        | 129.04          | 128.27          | 128.22          | 129.21           | <b>123.93</b>   | 129.62           | 130.06           | 129.19          | 128.88          | 127.95          | 129.12                 |
| Largest alignment           | 175992          | 158169          | 152405          | 152426           | 84393           | <b>278506</b>    | 181494           | 178460          | 171298          | 162199          | 154126                 |
| Total aligned length        | 111608713       | 111717063       | 111375299       | 112144165        | 107696193       | <b>112649626</b> | 112079362        | 111833973       | 111127562       | 111640564       | 111830509              |
| NA50                        | 19250           | 15446           | 16182           | 19817            | 7324            | <b>27349</b>     | 18525            | 17833           | 16821           | 14528           | 18818                  |
| NGA50                       | 18832           | 15025           | 15582           | 19469            | 6537            | <b>26744</b>     | 18121            | 17358           | 16161           | 14081           | 18357                  |
| NA75                        | 6427            | 4927            | 5068            | 6460             | 3427            | <b>9819</b>      | 5724             | 5697            | 5462            | 4737            | 6010                   |
| NGA75                       | 5852            | 4679            | 4766            | 6051             | 2881            | <b>9058</b>      | 5285             | 5223            | 4915            | 4461            | 5485                   |
| LA50                        | 1570            | 1953            | 1842            | 1510             | 3582            | <b>1113</b>      | 1669             | 1703            | 1803            | 2064            | 1638                   |
| LGA50                       | 1629            | 2023            | 1919            | 1550             | 4135            | <b>1146</b>      | 1715             | 1759            | 1902            | 2147            | 1691                   |
| LA75                        | 4143            | 5365            | 5096            | 4043             | 9439            | <b>2862</b>      | 4465             | 4559            | 4816            | 5716            | 4378                   |
| LGA75                       | 4420            | 5698            | 5469            | 4229             | 11261           | <b>3007</b>      | 4694             | 4831            | 5290            | 6104            | 4635                   |

## 4.2 IDBA

### 4.2.1 *B. dentium*

Table 14 contains the Quast report after assembling dataset *B. dentium* with IDBA .

Table 14: Assembly quality metrics for *B. dentium*

| Assembly                    | Uncorrected    | ACE                | BayesHammer  | BFC          | BLESS2         | Blue           | Fiona        | Karect        | Lighter        | Musket       | RACER          | SGA-EC       | Trowel       |
|-----------------------------|----------------|--------------------|--------------|--------------|----------------|----------------|--------------|---------------|----------------|--------------|----------------|--------------|--------------|
| # contigs (≥ 0 bp)          | 5027           | 2032               | 4055         | 3632         | 2220           | 3338           | 3103         | 3945          | 3423           | 3001         | 2523           | 4845         | 4177         |
| # contigs (≥ 1000 bp)       | 154            | 99                 | 109          | 82           | 57             | 70             | 83           | 74            | 97             | 88           | 80             | 162          | 140          |
| # contigs (≥ 5000 bp)       | 112            | 76                 | 81           | 58           | 42             | 51             | 63           | 55            | 71             | 66           | 60             | 115          | 101          |
| # contigs (≥ 10000 bp)      | 85             | 64                 | 69           | 53           | 39             | 48             | 53           | 49            | 58             | 58           | 55             | 91           | 79           |
| # contigs (≥ 25000 bp)      | 31             | 34                 | 37           | 38           | 31             | 32             | 36           | 31            | 38             | 36           | 35             | 36           | 40           |
| # contigs (≥ 50000 bp)      | 9              | 17                 | 16           | 21           | 18             | 19             | 18           | 19            | 16             | 15           | 18             | 5            | 11           |
| Total length (≥ 0 bp)       | <b>3587351</b> | 2819442            | 3496247      | 3480758      | 3117137        | 3444880        | 3414588      | 3476847       | 3453335        | 3417411      | 3367147        | 3568629      | 3518137      |
| Total length (≥ 1000 bp)    | 2609222        | 2604126            | 2611819      | 2614744      | 2607722        | 2615696        | 2610144      | 2613192       | 2614549        | 2614679      | <b>2615893</b> | 2606824      | 2612925      |
| Total length (≥ 5000 bp)    | 2514677        | 2553828            | 2553978      | 2567890      | 2580180        | <b>2582139</b> | 2571400      | 2581371       | 2560121        | 2572371      | 2576281        | 2499243      | 2533087      |
| Total length (≥ 10000 bp)   | 2315068        | 2469354            | 2466567      | 2532364      | 2556678        | <b>2560520</b> | 2504335      | 2533329       | 2459554        | 2509701      | 2541682        | 2317366      | 2380329      |
| Total length (≥ 25000 bp)   | 1438392        | 1953661            | 1957421      | 2283949      | <b>2433293</b> | 2273090        | 2233421      | 2217746       | 2110486        | 2125279      | 2211135        | 1418973      | 1758731      |
| Total length (≥ 50000 bp)   | 589275         | 1303207            | 1203707      | 1649327      | <b>1965790</b> | 1810343        | 1562706      | 1780649       | 1310233        | 1354916      | 1577255        | 363499       | 748566       |
| # contigs                   | 352            | 117                | 296          | 268          | 125            | 252            | 259          | 260           | 284            | 276          | 262            | 357          | 327          |
| Largest contig              | 99811          | 157035             | 119824       | 174678       | 197580         | 197580         | 210973       | <b>211639</b> | 147538         | 197572       | 174086         | 103372       | 149572       |
| Total length                | <b>2731975</b> | 2615596            | 2727231      | 2729908      | 2647585        | 2726849        | 2717295      | 2728488       | 2729152        | 2730793      | 2727323        | 2727106      | 2728098      |
| Reference length            | 2636367        | 2636367            | 2636367      | 2636367      | 2636367        | 2636367        | 2636367      | 2636367       | 2636367        | 2636367      | 2636367        | 2636367      | 2636367      |
| GC (%)                      | 58.64          | 58.49              | 58.63        | 58.63        | 58.51          | 58.64          | 58.61        | 58.64         | 58.63          | 58.64        | 58.63          | 58.64        | 58.63        |
| Reference GC (%)            | 58.54          | 58.54              | 58.54        | 58.54        | 58.54          | 58.54          | 58.54        | 58.54         | 58.54          | 58.54        | 58.54          | 58.54        | 58.54        |
| N50                         | 30669          | 47845              | 44252        | 58654        | <b>98980</b>   | 71013          | 55343        | 64662         | 47671          | 48847        | 62439          | 25330        | 31841        |
| NG50                        | 31451          | 47845              | 45395        | 60136        | <b>98980</b>   | 73724          | 56050        | 64662         | 47845          | 58654        | 62741          | 25469        | 32380        |
| N75                         | 14834          | 24492              | 21701        | 35593        | <b>47845</b>   | 35678          | 34935        | 34935         | 29210          | 20700        | 32388          | 15784        | 16984        |
| NG75                        | 15684          | 24492              | 23506        | 37464        | <b>47845</b>   | 39437          | 35678        | 42204         | 29913          | 29824        | 36267          | 16326        | 19214        |
| L50                         | 29             | 18                 | 20           | 16           | <b>10</b>      | 12             | 15           | 12            | 18             | 16           | 15             | 34           | 27           |
| LG50                        | 27             | 18                 | 19           | 15           | <b>10</b>      | 11             | 14           | 12            | 17             | 15           | 14             | 33           | 26           |
| L75                         | 64             | 35                 | 41           | 31           | <b>19</b>      | 25             | 30           | 26            | 36             | 34           | 30             | 70           | 55           |
| LG75                        | 59             | 35                 | 38           | 29           | <b>19</b>      | 23             | 28           | 24            | 34             | 31           | 28             | 66           | 51           |
| # misassemblies             | 0              | 0                  | 0            | 0            | 0              | 0              | 0            | 0             | 0              | 0            | 0              | 0            | 0            |
| # misassembled contigs      | 0              | 0                  | 0            | 0            | 0              | 0              | 0            | 0             | 0              | 0            | 0              | 0            | 0            |
| Misassembled contigs length | 0              | 0                  | 0            | 0            | 0              | 0              | 0            | 0             | 0              | 0            | 0              | 0            | 0            |
| # local misassemblies       | 2              | 2                  | 2            | 2            | 2              | 2              | 2            | 2             | 2              | 2            | 2              | 2            | 2            |
| # unaligned mis. contigs    | 0              | 0                  | 0            | 0            | 0              | 0              | 0            | 0             | 0              | 0            | 0              | 0            | 0            |
| # unaligned contigs         | 194 + 0 part   | <b>12 + 0 part</b> | 189 + 0 part | 188 + 0 part | 66 + 0 part    | 186 + 0 part   | 174 + 0 part | 186 + 0 part  | 187 + 0 part   | 190 + 0 part | 185 + 0 part   | 192 + 0 part | 188 + 0 part |
| Unaligned length            | 124776         | <b>6960</b>        | 122785       | 121410       | 40083          | 118938         | 109568       | 120541        | 119583         | 122203       | 118530         | 123616       | 121155       |
| Genome fraction (%)         | 98.738         | 98.815             | 98.701       | 98.844       | 98.847         | 98.848         | 98.812       | 98.845        | 98.852         | 98.834       | <b>98.863</b>  | 98.649       | 98.746       |
| Duplication ratio           | 1.002          | <b>1.001</b>       | <b>1.001</b> | <b>1.001</b> | <b>1.001</b>   | <b>1.001</b>   | <b>1.001</b> | <b>1.001</b>  | <b>1.001</b>   | <b>1.001</b> | <b>1.001</b>   | <b>1.001</b> | <b>1.001</b> |
| # N's per 100 kbp           | 0.00           | 0.00               | 0.00         | 0.00         | 0.00           | 0.00           | 0.00         | 0.00          | 0.00           | 0.00         | 0.00           | 0.00         | 0.00         |
| # mismatches per 100 kbp    | <b>0.23</b>    | <b>0.23</b>        | <b>0.23</b>  | <b>0.23</b>  | <b>0.23</b>    | 0.35           | 0.27         | <b>0.23</b>   | 0.27           | 0.31         | <b>0.23</b>    | <b>0.23</b>  | <b>0.23</b>  |
| # indels per 100 kbp        | 0.27           | <b>0.23</b>        | 0.27         | 0.31         | 0.58           | <b>0.23</b>    | 0.27         | 0.31          | 0.27           | 0.31         | <b>0.23</b>    | 0.27         | 0.27         |
| Largest alignment           | 99811          | 156760             | 119824       | 174678       | 197580         | 197580         | 210973       | <b>211639</b> | 147538         | 197572       | 174086         | 103372       | 149572       |
| Total aligned length        | 2606924        | 2608361            | 2604171      | 2608223      | 2607227        | 2607636        | 2607452      | 2607672       | <b>2609294</b> | 2608315      | 2608518        | 2603215      | 2606668      |
| NA50                        | 30669          | 47845              | 44252        | 58654        | <b>98980</b>   | 71013          | 55343        | 64662         | 47671          | 48847        | 62439          | 25330        | 31841        |
| NGA50                       | 31451          | 47845              | 45395        | 60136        | <b>98980</b>   | 73724          | 56050        | 64662         | 47845          | 58654        | 62741          | 25469        | 32380        |
| NA75                        | 14834          | 24492              | 21701        | 35593        | <b>47845</b>   | 35678          | 34935        | 34935         | 29210          | 20700        | 32388          | 15784        | 16984        |
| NGA75                       | 15684          | 24492              | 23506        | 37189        | <b>47845</b>   | 39437          | 35678        | 42204         | 29913          | 29824        | 36267          | 16326        | 18972        |
| LA50                        | 29             | 18                 | 20           | 16           | <b>10</b>      | 12             | 15           | 12            | 18             | 16           | 15             | 34           | 27           |
| LGA50                       | 27             | 18                 | 19           | 15           | <b>10</b>      | 11             | 14           | 12            | 17             | 15           | 14             | 33           | 26           |
| LA75                        | 64             | 35                 | 41           | 31           | <b>19</b>      | 25             | 30           | 26            | 36             | 34           | 30             | 70           | 55           |
| LGA75                       | 59             | 35                 | 38           | 29           | <b>19</b>      | 23             | 28           | 24            | 34             | 31           | 28             | 66           | 51           |

#### 4.2.2 *E. coli str. K-12 substr. DH10B*

Table 15 contains the Quast report after assembling dataset *E. coli str. K-12 substr. DH10B* with IDBA .

Table 15: Assembly quality metrics for *E. coli str. K-12 substr. DH10B*

| Assembly                    | Uncorrected       | ACE               | BayesHammer       | BFC               | BLESS2            | Blue              | Fiona             | Karet             | Lighter           | Musket            | RACER             | SGA-EC            | Trowel            |
|-----------------------------|-------------------|-------------------|-------------------|-------------------|-------------------|-------------------|-------------------|-------------------|-------------------|-------------------|-------------------|-------------------|-------------------|
| # contigs (≥ 0 bp)          | 2360              | 1011              | 974               | 641               | 614               | 752               | 704               | 845               | 681               | 674               | 667               | 1735              | 1154              |
| # contigs (≥ 1000 bp)       | 125               | 121               | 122               | 110               | 107               | 115               | 112               | 110               | 112               | 112               | 114               | 167               | 127               |
| # contigs (≥ 5000 bp)       | 97                | 95                | 97                | 86                | 85                | 90                | 89                | 85                | 88                | 88                | 89                | 130               | 101               |
| # contigs (≥ 10000 bp)      | 85                | 79                | 82                | 76                | 73                | 77                | 77                | 74                | 75                | 74                | 76                | 106               | 89                |
| # contigs (≥ 25000 bp)      | 63                | 60                | 61                | 57                | 56                | 59                | 58                | 55                | 57                | 58                | 56                | 63                | 64                |
| # contigs (≥ 50000 bp)      | 29                | 32                | 33                | 33                | 32                | 31                | 31                | 32                | 33                | 31                | 32                | 25                | 30                |
| Total length (≥ 0 bp)       | <b>4515653</b>    | 4411601           | 4409433           | 4386875           | 4383754           | 4393892           | 4391199           | 4400623           | 4390421           | 4389610           | 4387773           | 4462636           | 4424457           |
| Total length (≥ 1000 bp)    | 4329090           | 4327143           | 4328658           | <b>4329413</b>    | 4327908           | 4328587           | 4327815           | 4328681           | 4328305           | 4328052           | 4328697           | 4326431           | 4329230           |
| Total length (≥ 5000 bp)    | 4265809           | 4275841           | 4276153           | 4281299           | <b>4284862</b>    | 4280221           | 4280926           | 4278797           | 4280020           | 4279741           | 4279445           | 4240734           | 4270897           |
| Total length (≥ 10000 bp)   | 4173490           | 4150608           | 4159568           | <b>4201688</b>    | 4190257           | 4176438           | 4185157           | 4189340           | 4176318           | 4166508           | 4175910           | 4060828           | 4178528           |
| Total length (≥ 25000 bp)   | 3825722           | 3839346           | 3813633           | 3902949           | 3912933           | 3894188           | 3887474           | 3876118           | 3891890           | <b>3917393</b>    | 3859576           | 3335440           | 3762545           |
| Total length (≥ 50000 bp)   | 2633615           | 2854610           | 2791981           | 3072002           | <b>3082420</b>    | 2893257           | 2935976           | 3070569           | 3044346           | 2971324           | 3026965           | 1953025           | 2503554           |
| # contigs                   | 133               | 129               | 131               | 119               | 115               | 124               | 121               | 118               | 122               | 121               | 122               | 176               | 135               |
| Largest contig              | 239163            | 269573            | 206204            | <b>269702</b>     | <b>269702</b>     | 177084            | 269660            | 269637            | <b>269702</b>     | <b>269702</b>     | 269699            | 174732            | 178824            |
| Total length                | 4334631           | 4333487           | 4335683           | <b>4336423</b>    | 4334181           | 4335568           | 4334707           | 4335004           | 4336308           | 4335381           | 4334729           | 4332925           | 4335159           |
| Reference length            | 4686137           | 4686137           | 4686137           | 4686137           | 4686137           | 4686137           | 4686137           | 4686137           | 4686137           | 4686137           | 4686137           | 4686137           | 4686137           |
| GC (%)                      | 50.75             | 50.74             | 50.75             | 50.75             | 50.75             | 50.74             | 50.75             | 50.75             | 50.75             | 50.74             | 50.75             | 50.75             | 50.75             |
| Reference GC (%)            | 50.78             | 50.78             | 50.78             | 50.78             | 50.78             | 50.78             | 50.78             | 50.78             | 50.78             | 50.78             | 50.78             | 50.78             | 50.78             |
| N50                         | 60090             | 61037             | 62810             | <b>77601</b>      | <b>77601</b>      | 76358             | 76364             | 77573             | 73020             | <b>77601</b>      | 76339             | 45611             | 58765             |
| NG50                        | 58765             | 58765             | 59786             | 66088             | 67274             | 63502             | 66087             | <b>67318</b>      | 63521             | 66088             | 67228             | 43033             | 55666             |
| N75                         | 34689             | 40132             | 41267             | <b>43033</b>      | 43015             | 41478             | 40710             | 43011             | 42648             | 41772             | 41772             | 28506             | 35180             |
| NG75                        | 30831             | 31552             | 31676             | <b>34059</b>      | 34044             | 34058             | 32622             | 34058             | 34058             | 32648             | 31675             | 21579             | 30973             |
| L50                         | 21                | 20                | 23                | <b>18</b>         | <b>18</b>         | 19                | 19                | <b>18</b>         | 19                | <b>18</b>         | 19                | 30                | 24                |
| LG50                        | 24                | 23                | 26                | 21                | <b>20</b>         | 22                | 21                | <b>20</b>         | 22                | 21                | 21                | 34                | 28                |
| L75                         | 44                | 41                | 44                | 37                | <b>36</b>         | 40                | 39                | <b>36</b>         | 38                | 38                | 37                | 60                | 48                |
| LG75                        | 53                | 49                | 51                | 44                | <b>43</b>         | 46                | 46                | <b>43</b>         | 45                | 45                | 45                | 71                | 56                |
| # misassemblies             | 0                 | 0                 | 1                 | 1                 | 2                 | 1                 | 1                 | 2                 | 1                 | 0                 | 1                 | 1                 | 0                 |
| # misassembled contigs      | 0                 | 0                 | 1                 | 1                 | 1                 | 1                 | 1                 | 1                 | 1                 | 0                 | 1                 | 1                 | 0                 |
| Misassembled contigs length | 0                 | 0                 | 73043             | 50204             | 160773            | 115259            | 115095            | 160695            | 73020             | 0                 | 73061             | 57259             | 0                 |
| # local misassemblies       | 0                 | 1                 | 0                 | 2                 | 2                 | 0                 | 1                 | 1                 | 0                 | 0                 | 0                 | 0                 | 0                 |
| # structural variations     | 0                 | 0                 | 0                 | 0                 | 0                 | 0                 | 0                 | 0                 | 0                 | 0                 | 0                 | 0                 | 0                 |
| # unaligned mis. contigs    | 0                 | 0                 | 0                 | 0                 | 0                 | 0                 | 0                 | 0                 | 0                 | 0                 | 0                 | 0                 | 0                 |
| # unaligned contigs         | <b>0 + 0 part</b> | <b>0 + 0 part</b> | <b>0 + 0 part</b> | <b>0 + 0 part</b> | <b>0 + 0 part</b> | <b>0 + 0 part</b> | <b>1 + 0 part</b> | <b>0 + 0 part</b> | <b>0 + 0 part</b> | <b>0 + 0 part</b> | <b>0 + 0 part</b> | <b>0 + 0 part</b> | <b>0 + 0 part</b> |
| Unaligned length            | 0                 | 0                 | 0                 | 0                 | 0                 | 0                 | 777               | 0                 | 0                 | 0                 | 0                 | 0                 | 0                 |
| Genome fraction (%)         | 92.524            | 92.538            | 92.551            | 92.557            | 92.510            | 92.549            | 92.514            | 92.541            | <b>92.558</b>     | 92.536            | 92.527            | 92.493            | 92.539            |
| Duplication ratio           | 1.000             | <b>0.999</b>      | 1.000             | 1.000             | 1.000             | 1.000             | 1.000             | 1.000             | 1.000             | 1.000             | 1.000             | 1.000             | 1.000             |
| # N's per 100 kbp           | <b>0.00</b>       | <b>0.00</b>       | <b>0.00</b>       | <b>0.00</b>       | 1.32              | <b>0.00</b>       | <b>0.00</b>       | <b>0.00</b>       | <b>0.00</b>       | <b>0.00</b>       | <b>0.00</b>       | <b>0.00</b>       | <b>0.00</b>       |
| # mismatches per 100 kbp    | <b>0.16</b>       | 0.88              | 0.67              | 0.92              | 0.95              | 0.95              | 1.01              | 0.85              | 1.01              | 1.18              | 2.01              | 0.83              | 0.48              |
| # indels per 100 kbp        | 1.75              | 4.34              | 2.56              | 1.78              | <b>1.41</b>       | 1.94              | 2.05              | 2.35              | 2.01              | 1.68              | 2.01              | 2.24              | 2.31              |
| Largest alignment           | 239163            | 269573            | 206204            | <b>269702</b>     | <b>269702</b>     | 177084            | 269660            | 269637            | <b>269702</b>     | <b>269702</b>     | 269699            | 174732            | 178824            |
| Total aligned length        | 4334630           | 4333450           | 4335683           | <b>4336421</b>    | 4334122           | 4335559           | 4333913           | 4335004           | 4336306           | 4335379           | 4334723           | 4332925           | 4334971           |
| NA50                        | 60090             | 61037             | 61004             | <b>77601</b>      | <b>77601</b>      | 76358             | 76364             | 77573             | 67318             | <b>77601</b>      | 76339             | 45611             | 58765             |
| NGA50                       | 58765             | 58765             | 59634             | <b>66088</b>      | 66087             | 63502             | 66087             | 66063             | 62810             | <b>66088</b>      | 66087             | 43033             | 55666             |
| NA75                        | 34689             | 40132             | 40148             | <b>43033</b>      | 43015             | 41478             | 40710             | 41772             | 41731             | 41772             | 41267             | 27454             | 35180             |
| NGA75                       | 30831             | 31552             | 31552             | <b>34059</b>      | 34044             | 32647             | 32622             | 34058             | 32818             | 32648             | 31675             | 21281             | 30973             |
| LA50                        | 21                | 20                | 23                | <b>18</b>         | <b>18</b>         | 19                | 19                | <b>18</b>         | 19                | <b>18</b>         | 19                | 30                | 24                |
| LGA50                       | 24                | 23                | 26                | 21                | <b>21</b>         | 22                | 21                | <b>21</b>         | 22                | <b>21</b>         | 21                | 34                | 28                |
| LA75                        | 44                | 41                | 45                | 37                | <b>37</b>         | 40                | 39                | 38                | 39                | 38                | 38                | 61                | 48                |
| LGA75                       | 53                | 49                | 52                | 44                | <b>44</b>         | 47                | 46                | <b>44</b>         | 46                | 45                | 45                | 72                | 56                |

### 4.2.3 *E. coli str. K-12 substr. MG1655*

Table 16 contains the Quast report after assembling dataset *E. coli str. K-12 substr. MG1655* with IDBA .

Table 16: Assembly quality metrics for *E. coli str. K-12 substr. MG1655*

| Assembly                    | Uncorrected    | ACE        | BayesHammer    | BFC        | BLESS2            | Blue       | Fiona      | Karect     | Lighter    | Musket     | RACER       | SGA-EC      | Trowel         |
|-----------------------------|----------------|------------|----------------|------------|-------------------|------------|------------|------------|------------|------------|-------------|-------------|----------------|
| # contigs (≥ 0 bp)          | 2764           | 2174       | 803            | 1082       | 810               | 1210       | 1352       | 936        | 1220       | 1176       | 1332        | 2229        | 1314           |
| # contigs (≥ 1000 bp)       | 116            | 129        | 99             | 115        | 110               | 118        | 117        | 110        | 114        | 121        | 120         | 116         | 116            |
| # contigs (≥ 5000 bp)       | 93             | 100        | 75             | 88         | 81                | 90         | 87         | 84         | 88         | 92         | 93          | 91          | 91             |
| # contigs (≥ 10000 bp)      | 80             | 88         | 70             | 78         | 73                | 77         | 77         | 74         | 77         | 81         | 85          | 79          | 78             |
| # contigs (≥ 25000 bp)      | 58             | 61         | 54             | 56         | 54                | 57         | 57         | 54         | 56         | 59         | 58          | 58          | 57             |
| # contigs (≥ 50000 bp)      | 33             | 36         | 33             | 33         | 33                | 34         | 33         | 34         | 34         | 34         | 34          | 33          | 34             |
| Total length (≥ 0 bp)       | <b>4747542</b> | 4690218    | 4605109        | 4619712    | 4599723           | 4625294    | 4633230    | 4609966    | 4630594    | 4624123    | 4635398     | 4706232     | 4641206        |
| Total length (≥ 1000 bp)    | 4525935        | 4527292    | <b>4532359</b> | 4531014    | 4531064           | 4529382    | 4530010    | 4529620    | 4530595    | 4530717    | 4529205     | 4526427     | 4531535        |
| Total length (≥ 5000 bp)    | 4472536        | 4458330    | 4472750        | 4470195    | 4462677           | 4464111    | 4460408    | 4469372    | 4468887    | 4461488    | 4464995     | 4465235     | <b>4477643</b> |
| Total length (≥ 10000 bp)   | 4373336        | 4373951    | <b>4435795</b> | 4394143    | 4400650           | 4363962    | 4386938    | 4392757    | 4386462    | 4379290    | 4406336     | 4373714     | 4379980        |
| Total length (≥ 25000 bp)   | 4037922        | 3955590    | <b>4213354</b> | 4077735    | 4113882           | 4052339    | 4087233    | 4100329    | 4072451    | 4058027    | 4017375     | 4050236     | 4056754        |
| Total length (≥ 50000 bp)   | 3136081        | 3037009    | <b>3436733</b> | 3234735    | 3355993           | 3217140    | 3218457    | 3382460    | 3272272    | 3148687    | 3147332     | 3159213     | 3235091        |
| # contigs                   | 129            | 138        | 110            | 126        | 119               | 129        | 128        | 123        | 124        | 132        | 132         | 129         | 127            |
| Largest contig              | 209341         | 173958     | <b>221477</b>  | 209350     | 221408            | 209346     | 209344     | 209344     | 173964     | 173963     | 173962      | 209302      | 209349         |
| Total length                | 4535920        | 4534370    | <b>4540813</b> | 4539316    | 4537947           | 4537626    | 4538026    | 4539311    | 4538316    | 4538868    | 4538199     | 4535889     | 4540024        |
| Reference length            | 4639675        | 4639675    | 4639675        | 4639675    | 4639675           | 4639675    | 4639675    | 4639675    | 4639675    | 4639675    | 4639675     | 4639675     | 4639675        |
| GC (%)                      | 50.74          | 50.73      | 50.74          | 50.74      | 50.74             | 50.73      | 50.73      | 50.74      | 50.73      | 50.74      | 50.74       | 50.73       | 50.74          |
| Reference GC (%)            | 50.79          | 50.79      | 50.79          | 50.79      | 50.79             | 50.79      | 50.79      | 50.79      | 50.79      | 50.79      | 50.79       | 50.79       | 50.79          |
| N50                         | 82762          | 66115      | <b>95664</b>   | 86971      | 95437             | 80468      | 82764      | 86968      | 82761      | 80468      | 82031       | 82766       | 82762          |
| NG50                        | 80467          | 65113      | <b>95664</b>   | 82764      | 86972             | 78592      | 82764      | 86968      | 82550      | 78592      | 80378       | 80469       | 82552          |
| N75                         | 42704          | 41736      | <b>50620</b>   | 44004      | 48769             | 43791      | 43792      | 48769      | 45417      | 43177      | 42696       | 41954       | 43792          |
| NG75                        | 41267          | 41031      | <b>48769</b>   | 42697      | 45437             | 42509      | 42700      | 45437      | 43217      | 41718      | 41267       | 41019       | 41780          |
| L50                         | 19             | 23         | <b>17</b>      | 18         | <b>17</b>         | 19         | 19         | 18         | 19         | 20         | 20          | 19          | 19             |
| LG50                        | 20             | 24         | <b>17</b>      | 19         | 18                | 20         | 19         | 18         | 20         | 21         | 21          | 20          | 20             |
| L75                         | 39             | 44         | <b>33</b>      | 37         | 34                | 39         | 38         | 35         | 37         | 40         | 40          | 39          | 38             |
| LG75                        | 41             | 46         | <b>34</b>      | 39         | 36                | 40         | 39         | 37         | 39         | 42         | 42          | 41          | 40             |
| # misassemblies             | 0              | 0          | 1              | 1          | 0                 | 0          | 0          | 1          | 0          | 0          | 2           | 0           | 0              |
| # misassembled contigs      | 0              | 0          | 1              | 1          | 0                 | 0          | 0          | 1          | 0          | 0          | 2           | 0           | 0              |
| Misassembled contigs length | 0              | 0          | 10212          | 10203      | 0                 | 0          | 0          | 10153      | 0          | 0          | 104717      | 0           | 0              |
| # local misassemblies       | 1              | 2          | 12             | 1          | 7                 | 1          | 2          | 2          | 2          | 1          | 2           | 1           | 1              |
| # unaligned mis. contigs    | 0              | 0          | 0              | 0          | 0                 | 0          | 0          | 0          | 0          | 0          | 0           | 0           | 0              |
| # unaligned contigs         | 3 + 0 part     | 2 + 0 part | 4 + 0 part     | 3 + 0 part | <b>0 + 1 part</b> | 3 + 0 part | 3 + 0 part | 3 + 0 part | 3 + 0 part | 3 + 0 part | 3 + 0 part  | 3 + 0 part  | 3 + 0 part     |
| Unaligned length            | 2325           | 1336       | 3165           | 2325       | <b>1232</b>       | 2325       | 2275       | 2328       | 2321       | 2325       | 2326        | 2325        | 2325           |
| Genome fraction (%)         | 97.695         | 97.691     | 97.771         | 97.767     | 97.756            | 97.735     | 97.743     | 97.770     | 97.748     | 97.751     | 97.741      | 97.692      | <b>97.777</b>  |
| Duplication ratio           | 1.000          | 1.000      | 1.000          | 1.000      | 1.000             | 1.000      | 1.000      | 1.000      | 1.000      | 1.000      | 1.000       | 1.000       | 1.000          |
| # N's per 100 kbp           | 0.44           | 0.55       | 14.12          | 0.29       | 5.02              | 0.46       | 0.37       | 0.24       | 0.64       | 0.11       | <b>0.09</b> | 0.42        | 0.22           |
| # mismatches per 100 kbp    | 0.22           | 1.08       | 0.73           | 0.73       | 0.97              | 0.53       | 1.68       | 1.41       | 0.60       | 1.01       | 1.17        | <b>0.20</b> | 0.46           |
| # indels per 100 kbp        | 1.76           | 4.70       | 1.76           | 1.59       | <b>1.50</b>       | 1.98       | 1.81       | 1.85       | 1.74       | 1.92       | 2.40        | 1.77        | 1.90           |
| Largest alignment           | 209341         | 173958     | <b>221392</b>  | 209350     | 221360            | 209346     | 209344     | 209344     | 173964     | 173963     | 173962      | 209302      | 209349         |
| Total aligned length        | 4533238        | 4532587    | 4536848        | 4536542    | 4536266           | 4535022    | 4535432    | 4536704    | 4535629    | 4536019    | 4535447     | 4533187     | <b>4537044</b> |
| NA50                        | 82762          | 66115      | <b>95658</b>   | 86971      | 95394             | 80468      | 82764      | 86968      | 82761      | 80468      | 77721       | 82766       | 82762          |
| NGA50                       | 80467          | 65113      | <b>95658</b>   | 82764      | 86972             | 78592      | 82764      | 86968      | 82550      | 78592      | 77721       | 80469       | 82552          |
| NA75                        | 42704          | 41727      | <b>50620</b>   | 44004      | 48769             | 43791      | 43792      | 48769      | 45342      | 43175      | 41869       | 41954       | 43792          |
| NGA75                       | 41267          | 41031      | <b>48769</b>   | 42697      | 45437             | 42509      | 42700      | 45437      | 43217      | 41718      | 41267       | 41019       | 41780          |
| LA50                        | 19             | 23         | <b>17</b>      | 18         | <b>17</b>         | 19         | 19         | 18         | 19         | 20         | 21          | 19          | 19             |
| LGA50                       | 20             | 24         | <b>17</b>      | 19         | 18                | 20         | 19         | 18         | 20         | 21         | 21          | 20          | 20             |
| L75                         | 39             | 44         | <b>33</b>      | 37         | 34                | 39         | 38         | 35         | 37         | 40         | 41          | 39          | 38             |
| LGA75                       | 41             | 46         | <b>34</b>      | 39         | 36                | 40         | 39         | 37         | 39         | 42         | 43          | 41          | 40             |



#### 4.2.4 *S. enterica*

Table 17 contains the Quast report after assembling dataset *S. enterica* with IDBA .

Table 17: Assembly quality metrics for *S. enterica*

| Assembly                    | Uncorrected    | ACE        | BayesHammer       | BFC           | BLESS2            | Blue           | Fiona      | Karect         | Lighter      | Musket       | RACER         | SGA-EC        | Trowel       |
|-----------------------------|----------------|------------|-------------------|---------------|-------------------|----------------|------------|----------------|--------------|--------------|---------------|---------------|--------------|
| # contigs (≥ 0 bp)          | 812            | 823        | 869               | 491           | 443               | 558            | 506        | 479            | 600          | 686          | 572           | 565           | 563          |
| # contigs (≥ 1000 bp)       | 79             | 77         | 70                | 71            | 67                | 71             | 73         | 69             | 75           | 73           | 71            | 78            | 79           |
| # contigs (≥ 5000 bp)       | 66             | 65         | 62                | 63            | 58                | 62             | 62         | 60             | 66           | 63           | 60            | 66            | 66           |
| # contigs (≥ 10000 bp)      | 61             | 58         | 59                | 57            | 54                | 55             | 57         | 55             | 60           | 59           | 55            | 61            | 61           |
| # contigs (≥ 25000 bp)      | 51             | 50         | 49                | 48            | 45                | 48             | 48         | 47             | 50           | 50           | 46            | 50            | 49           |
| # contigs (≥ 50000 bp)      | 40             | 37         | 39                | 39            | 35                | 37             | 38         | 37             | 38           | 40           | 36            | 39            | 40           |
| Total length (≥ 0 bp)       | <b>4821474</b> | 4804536    | 4806987           | 4790253       | 4783105           | 4792819        | 4790169    | 4786252        | 4798745      | 4801080      | 4793989       | 4798672       | 4799077      |
| Total length (≥ 1000 bp)    | 4725334        | 4722054    | 4725977           | 4725529       | <b>4729204</b>    | 4724999        | 4725076    | 4726267        | 4723966      | 4723639      | 4726072       | 4726664       | 4727836      |
| Total length (≥ 5000 bp)    | 4700100        | 4695972    | 4706517           | 4701537       | <b>4708332</b>    | 4705864        | 4701692    | 4705593        | 4703476      | 4701522      | 4700545       | 4702472       | 4698906      |
| Total length (≥ 10000 bp)   | 4661202        | 4644548    | <b>4685098</b>    | 4656215       | 4674900           | 4653437        | 4662492    | 4669155        | 4658992      | 4672133      | 4663193       | 4663624       | 4663395      |
| Total length (≥ 25000 bp)   | 4513568        | 4509580    | 4521938           | 4515340       | 4539096           | <b>4550383</b> | 4527714    | 4546144        | 4512460      | 4537287      | 4510828       | 4495372       | 4461605      |
| Total length (≥ 50000 bp)   | 4076548        | 4009703    | 4141396           | 4164954       | 4156507           | 4129418        | 4146808    | <b>4165139</b> | 4040894      | 4157010      | 4129115       | 4085924       | 4115384      |
| # contigs                   | 89             | 92         | 83                | 87            | 79                | 84             | 87         | 87             | 85           | 88           | 87            | 91            | 89           |
| Largest contig              | 238647         | 250669     | 251312            | 233440        | <b>459069</b>     | 270864         | 271383     | 271408         | 251213       | 270980       | 251397        | 300827        | 251469       |
| Total length                | 4731590        | 4731287    | 4733912           | 4734797       | 4736663           | 4732933        | 4733552    | <b>4737085</b> | 4730461      | 4733123      | 4735739       | 4734531       | 4734203      |
| Reference length            | 4888768        | 4888768    | 4888768           | 4888768       | 4888768           | 4888768        | 4888768    | 4888768        | 4888768      | 4888768      | 4888768       | 4888768       | 4888768      |
| GC (%)                      | 52.12          | 52.12      | 52.12             | 52.12         | 52.12             | 52.12          | 52.12      | 52.12          | 52.12        | 52.12        | 52.12         | 52.12         | 52.12        |
| Reference GC (%)            | 52.09          | 52.09      | 52.09             | 52.09         | 52.09             | 52.09          | 52.09      | 52.09          | 52.09        | 52.09        | 52.09         | 52.09         | 52.09        |
| N50                         | 95967          | 103744     | 103707            | 104432        | 105442            | 105471         | 104212     | 105364         | 103730       | 103041       | <b>113432</b> | 96275         | 96157        |
| NG50                        | 95967          | 96604      | 103707            | 103449        | 104432            | 104432         | 103730     | 104151         | 103730       | 96499        | <b>105573</b> | 96162         | 95970        |
| N75                         | 60821          | 73757      | 73753             | 76273         | 77767             | 76975          | 76712      | <b>77948</b>   | 59513        | 73751        | 77944         | 60821         | 60821        |
| NG75                        | 58498          | 72340      | 59289             | 60614         | <b>76975</b>      | 73711          | 60821      | <b>76975</b>   | 58498        | 60821        | 73752         | 58498         | 58498        |
| L50                         | 17             | 16         | 16                | 15            | <b>13</b>         | 15             | 15         | 15             | 16           | 16           | 14            | 16            | 16           |
| LG50                        | 17             | 17         | 16                | 16            | <b>14</b>         | 16             | 16         | 16             | 16           | 17           | 15            | 17            | 17           |
| L75                         | 31             | 30         | 29                | 29            | <b>26</b>         | 28             | 28         | 28             | 30           | 30           | 27            | 30            | 30           |
| LG75                        | 33             | 31         | 31                | 31            | <b>27</b>         | 30             | 30         | 29             | 32           | 32           | 29            | 32            | 32           |
| # misassemblies             | 12             | 12         | 12                | <b>11</b>     | 12                | 12             | 12         | 12             | 12           | 12           | 12            | 12            | 12           |
| # misassembled contigs      | 11             | 11         | 11                | <b>10</b>     | 11                | 11             | 11         | 11             | 11           | 11           | 11            | 11            | 11           |
| Misassembled contigs length | 1033227        | 948436     | 1034172           | <b>943010</b> | 1263534           | 1032332        | 1031396    | 1032285        | 991683       | 1031666      | 1032946       | 1014811       | 1033117      |
| # local misassemblies       | 6              | 57         | 53                | 63            | <b>43</b>         | 53             | 62         | 51             | 68           | 63           | 53            | 61            | 56           |
| # unaligned mis. contigs    | 0              | 0          | 0                 | 0             | 0                 | 0              | 0          | 0              | 0            | 0            | 0             | 0             | 0            |
| # unaligned contigs         | 5 + 5 part     | 4 + 5 part | <b>3 + 5 part</b> | 6 + 6 part    | <b>3 + 5 part</b> | 5 + 5 part     | 5 + 5 part | 6 + 5 part     | 4 + 5 part   | 5 + 5 part   | 5 + 5 part    | 5 + 5 part    | 5 + 5 part   |
| Unaligned length            | 61435          | 61416      | <b>60729</b>      | 62794         | 61137             | 62242          | 61957      | 62807          | 61625        | 62237        | 62200         | 61715         | 61855        |
| Genome fraction (%)         | 95.501         | 95.466     | 95.571            | 95.548        | 95.592            | 95.521         | 95.502     | <b>95.595</b>  | 95.481       | 95.525       | 95.579        | 95.552        | 95.546       |
| Duplication ratio           | <b>1.000</b>   | 1.001      | <b>1.000</b>      | <b>1.000</b>  | <b>1.000</b>      | <b>1.000</b>   | 1.001      | <b>1.000</b>   | <b>1.000</b> | <b>1.000</b> | <b>1.000</b>  | <b>1.000</b>  | <b>1.000</b> |
| # N's per 100 kbp           | 0.00           | 0.00       | 0.00              | 0.00          | 0.00              | 0.00           | 0.00       | 0.00           | 0.00         | 0.00         | 0.00          | 0.00          | 0.00         |
| # mismatches per 100 kbp    | 7.52           | 6.49       | 7.34              | 6.34          | 8.56              | 6.51           | 8.57       | 6.33           | 7.50         | 6.55         | 6.53          | 7.43          | <b>6.29</b>  |
| # indels per 100 kbp        | 0.47           | 0.28       | 0.49              | 0.36          | 0.75              | 0.30           | 0.69       | 0.28           | 0.54         | <b>0.26</b>  | 0.30          | 0.49          | 0.28         |
| Largest alignment           | 238647         | 250669     | 251312            | 233440        | 283927            | 270864         | 271383     | 271408         | 251213       | 270980       | 251397        | <b>300827</b> | 251469       |
| Total aligned length        | 4669316        | 4667770    | 4672698           | 4671545       | <b>4673500</b>    | 4670212        | 4669307    | <b>4673820</b> | 4668360      | 4670394      | 4673052       | 4671906       | 4671511      |
| NA50                        | 82209          | 93265      | 90110             | 90108         | <b>96263</b>      | 93583          | 89837      | 95926          | 89730        | 89868        | 93347         | 86748         | 86993        |
| NGA50                       | 79980          | 93265      | 86993             | 86993         | <b>93583</b>      | 89628          | 89837      | <b>93583</b>   | 86993        | 86852        | 93347         | 82085         | 82103        |
| NA75                        | 55119          | 56400      | 56890             | 56890         | <b>58734</b>      | 56707          | 56601      | 58724          | 55119        | 56662        | 56890         | 55119         | 55119        |
| NGA75                       | 52699          | 53069      | 53855             | 55119         | <b>56890</b>      | 56354          | 55119      | <b>56890</b>   | 53069        | 55119        | 55119         | 53069         | 53069        |
| LA50                        | 19             | 18         | 17                | 17            | <b>15</b>         | 16             | 17         | 16             | 17           | 18           | 16            | 18            | 18           |
| LGA50                       | 20             | 18         | 18                | 18            | <b>16</b>         | 17             | 17         | 17             | 18           | 19           | <b>16</b>     | 19            | 19           |
| LA75                        | 36             | 34         | 34                | 34            | <b>30</b>         | 33             | 33         | 32             | 35           | 35           | 32            | 35            | 36           |
| LGA75                       | 39             | 36         | 37                | 36            | <b>32</b>         | 35             | 35         | 34             | 37           | 37           | 34            | 37            | 38           |

#### 4.2.5 *P. aeruginosa*

Table 18 contains the Quast report after assembling dataset *P. aeruginosa* with IDBA .

Table 18: Assembly quality metrics for *P. aeruginosa*

| Assembly                    | Uncorrected    | ACE            | BayesHammer | BFC            | BLESS2     | Blue        | Fiona      | Karect     | Lighter    | Musket        | RACER      | SGA-EC         | Trowel     |
|-----------------------------|----------------|----------------|-------------|----------------|------------|-------------|------------|------------|------------|---------------|------------|----------------|------------|
| # contigs (≥ 0 bp)          | 640            | 1130           | 634         | 443            | 445        | 575         | 501        | 633        | 494        | 600           | 842        | 558            | 576        |
| # contigs (≥ 1000 bp)       | 99             | 130            | 108         | 106            | 109        | 115         | 110        | 115        | 109        | 108           | 110        | 102            | 108        |
| # contigs (≥ 5000 bp)       | 74             | 103            | 81          | 78             | 77         | 84          | 80         | 86         | 81         | 81            | 80         | 75             | 81         |
| # contigs (≥ 10000 bp)      | 68             | 94             | 76          | 73             | 73         | 79          | 74         | 79         | 76         | 76            | 74         | 71             | 77         |
| # contigs (≥ 25000 bp)      | 59             | 76             | 64          | 63             | 63         | 67          | 64         | 66         | 64         | 66            | 62         | 60             | 65         |
| # contigs (≥ 50000 bp)      | 38             | 41             | 39          | 40             | 39         | 40          | 40         | 40         | 39         | 40            | 39         | 38             | 39         |
| Total length (≥ 0 bp)       | 6239779        | <b>6253244</b> | 6234266     | 6224805        | 6223542    | 6231832     | 6227762    | 6231337    | 6227904    | 6233154       | 6245761    | 6232323        | 6233959    |
| Total length (≥ 1000 bp)    | 6174563        | 6152014        | 6169579     | <b>6175263</b> | 6174246    | 6170609     | 6171734    | 6166898    | 6173390    | 6170887       | 6169227    | 6170833        | 6170970    |
| Total length (≥ 5000 bp)    | <b>6113582</b> | 6088350        | 6105032     | 6108520        | 6101292    | 6102324     | 6102432    | 6099653    | 6107461    | 6105881       | 6100101    | 6107264        | 6106618    |
| Total length (≥ 10000 bp)   | 6076163        | 6027150        | 6072784     | 6076383        | 6074339    | 6070208     | 6064233    | 6051239    | 6075891    | 6073767       | 6062610    | <b>6084914</b> | 6084289    |
| Total length (≥ 25000 bp)   | <b>5923485</b> | 5709368        | 5869363     | 5909336        | 5908572    | 5858988     | 5898372    | 5805141    | 5870750    | 5907954       | 5857882    | 5902501        | 5878244    |
| Total length (≥ 50000 bp)   | <b>5112838</b> | 4369494        | 4949439     | 5058315        | 5020886    | 4874531     | 5007305    | 4838181    | 4945028    | 4965029       | 5027585    | 5087636        | 4912645    |
| # contigs                   | 114            | 148            | 124         | 123            | 126        | 132         | 126        | 132        | 125        | 126           | 125        | 119            | 125        |
| Largest contig              | 326181         | 250136         | 275768      | 326189         | 326267     | 326202      | 325991     | 325840     | 326196     | <b>326346</b> | 326048     | 326183         | 326193     |
| Total length                | 6184663        | 6163897        | 6180295     | <b>6186722</b> | 6185705    | 6181504     | 6182450    | 6178149    | 6184137    | 6183023       | 6179265    | 6182323        | 6182463    |
| Reference length            | 6264404        | 6264404        | 6264404     | 6264404        | 6264404    | 6264404     | 6264404    | 6264404    | 6264404    | 6264404       | 6264404    | 6264404        | 6264404    |
| GC (%)                      | 66.59          | 66.59          | 66.59       | 66.59          | 66.59      | 66.59       | 66.59      | 66.59      | 66.59      | 66.59         | 66.59      | 66.59          | 66.59      |
| Reference GC (%)            | 66.56          | 66.56          | 66.56       | 66.56          | 66.56      | 66.56       | 66.56      | 66.56      | 66.56      | 66.56         | 66.56      | 66.56          | 66.56      |
| N50                         | <b>146539</b>  | 94524          | 128842      | 116297         | 112489     | 112485      | 112476     | 109839     | 112487     | 112487        | 116297     | 146417         | 112480     |
| NG50                        | <b>146539</b>  | 94524          | 128842      | 112478         | 112489     | 112485      | 111578     | 109839     | 112487     | 112487        | 116297     | 146417         | 112480     |
| N75                         | <b>71679</b>   | 47785          | 63533       | 67237          | 63639      | 58292       | 63360      | 58397      | 63700      | 63532         | 63700      | 68180          | 59169      |
| NG75                        | <b>67253</b>   | 47710          | 59080       | 63700          | 63533      | 55195       | 59240      | 55255      | 63318      | 59079         | 63533      | 67245          | 58397      |
| L50                         | <b>15</b>      | 23             | 16          | 16             | 16         | 17          | 16         | 18         | 17         | 17            | 16         | <b>15</b>      | 17         |
| LG50                        | <b>15</b>      | 23             | 16          | 17             | 16         | 17          | 17         | 18         | 17         | 17            | 16         | <b>15</b>      | 17         |
| L75                         | <b>30</b>      | 47             | 34          | 33             | 33         | 36          | 34         | 37         | 34         | 35            | 33         | 31             | 35         |
| LG75                        | <b>31</b>      | 48             | 35          | 34             | 34         | 37          | 35         | 38         | 35         | 36            | 34         | 32             | 36         |
| # misassemblies             | 2              | <b>1</b>       | <b>1</b>    | <b>1</b>       | <b>1</b>   | <b>1</b>    | <b>1</b>   | <b>1</b>   | <b>2</b>   | <b>1</b>      | <b>1</b>   | <b>2</b>       | <b>2</b>   |
| # misassembled contigs      | 2              | <b>1</b>       | <b>1</b>    | <b>1</b>       | <b>1</b>   | <b>1</b>    | <b>1</b>   | <b>1</b>   | <b>2</b>   | <b>1</b>      | <b>1</b>   | <b>2</b>       | <b>2</b>   |
| Misassembled contigs length | 160470         | <b>115647</b>  | 116061      | 116297         | 116297     | 116297      | 116154     | 116186     | 160337     | 116297        | 116297     | 160337         | 160337     |
| # local misassemblies       | 53             | 171            | 78          | 47             | <b>44</b>  | 52          | 65         | 100        | 55         | 62            | 75         | 59             | 60         |
| # unaligned mis. contigs    | 0              | 0              | 0           | 0              | 0          | 0           | 0          | 0          | 0          | 0             | 0          | 0              | 0          |
| # unaligned contigs         | 0 + 1 part     | 0 + 1 part     | 0 + 1 part  | 0 + 1 part     | 0 + 1 part | 0 + 1 part  | 0 + 1 part | 0 + 1 part | 0 + 1 part | 0 + 1 part    | 0 + 1 part | 0 + 1 part     | 0 + 1 part |
| Unaligned length            | 10079          | 10079          | 10079       | 10079          | 10079      | 10079       | 10079      | 10079      | 10079      | 10079         | 10079      | 10079          | 10079      |
| Genome fraction (%)         | 98.548         | 98.209         | 98.477      | <b>98.580</b>  | 98.570     | 98.494      | 98.512     | 98.441     | 98.539     | 98.517        | 98.459     | 98.507         | 98.509     |
| Duplication ratio           | 1.000          | 1.000          | 1.000       | 1.000          | 1.000      | 1.000       | 1.000      | 1.000      | 1.000      | 1.000         | 1.000      | 1.000          | 1.000      |
| # N's per 100 kbp           | 0.00           | 0.00           | 0.00        | 0.00           | 0.00       | 0.00        | 0.00       | 0.00       | 0.00       | 0.00          | 0.00       | 0.00           | 0.00       |
| # mismatches per 100 kbp    | 1.34           | 1.56           | 1.64        | <b>1.26</b>    | 1.39       | 1.56        | 1.39       | 1.30       | 1.43       | 1.51          | 1.39       | 1.33           | 1.59       |
| # indels per 100 kbp        | 0.73           | 0.75           | 0.71        | 0.71           | 1.51       | <b>0.70</b> | 0.76       | 0.79       | 0.78       | <b>0.70</b>   | 0.75       | 0.71           | 0.71       |
| Largest alignment           | 326126         | 250136         | 275767      | 326188         | 326267     | 326157      | 325973     | 325821     | 326054     | <b>326346</b> | 326048     | 326128         | 326138     |
| Total aligned length        | 6174529        | 6153680        | 6170206     | <b>6176642</b> | 6175542    | 6171363     | 6172352    | 6168051    | 6173914    | 6172792       | 6169085    | 6172189        | 6172328    |
| NA50                        | <b>146539</b>  | 93281          | 128842      | 112478         | 111603     | 110973      | 111578     | 103345     | 111389     | 111395        | 112464     | 146417         | 110996     |
| NGA50                       | <b>146539</b>  | 93281          | 128842      | 111591         | 111603     | 110973      | 109872     | 101701     | 111389     | 111395        | 112464     | 146417         | 110996     |
| NA75                        | <b>66126</b>   | 47674          | 59080       | 63700          | 63533      | 55195       | 59240      | 55255      | 63318      | 59079         | 63700      | <b>66126</b>   | 59169      |
| NGA75                       | <b>65205</b>   | 47653          | 58397       | 63533          | 59240      | 54953       | 58397      | 54953      | 59240      | 58256         | 63533      | 63700          | 58397      |
| LA50                        | <b>15</b>      | 23             | 16          | 16             | 16         | 17          | 16         | 18         | 17         | 17            | 16         | <b>15</b>      | 17         |
| LGA50                       | <b>15</b>      | 23             | 16          | 17             | 16         | 17          | 17         | 19         | 17         | 17            | 16         | <b>15</b>      | 17         |
| LA75                        | <b>31</b>      | 48             | 35          | 34             | 34         | 37          | 35         | 38         | 35         | 36            | 33         | 32             | 35         |
| LGA75                       | <b>32</b>      | 49             | 36          | 35             | 35         | 38          | 36         | 39         | 36         | 37            | 34         | 33             | 36         |

#### 4.2.6 *H. sapiens* Chr. 21

Table 19 contains the Quast report after assembling dataset *H. sapiens* Chr. 21 with IDBA .

Table 19: Assembly quality metrics for *H. sapiens* Chr. 21

| Assembly                    | Uncorrected     | ACE             | BayesHammer     | BFC           | BLESS2              | Blue          | Fiona         | Karect        | Lighter       | Musket        | RACER         | SGA-EC        | Trowel        |
|-----------------------------|-----------------|-----------------|-----------------|---------------|---------------------|---------------|---------------|---------------|---------------|---------------|---------------|---------------|---------------|
| # contigs (≥ 0 bp)          | 102309          | 138880          | 94922           | 106611        | 91455               | 134746        | 122964        | 108526        | 107836        | 112054        | 123551        | 105099        | 110982        |
| # contigs (≥ 1000 bp)       | 4098            | 4449            | 3534            | 4123          | 4049                | 4664          | 4251          | 3925          | 4119          | 4178          | 4693          | 4100          | 4343          |
| # contigs (≥ 5000 bp)       | 2034            | 2045            | 1951            | 2040          | 2005                | 2065          | 2057          | 2019          | 2034          | 2047          | 2098          | 2026          | 2054          |
| # contigs (≥ 10000 bp)      | 1016            | 990             | 1056            | 1025          | 1020                | 945           | 1001          | 1040          | 1034          | 1026          | 967           | 1036          | 985           |
| # contigs (≥ 25000 bp)      | 188             | 157             | 243             | 181           | 187                 | 143           | 178           | 194           | 186           | 177           | 132           | 187           | 165           |
| # contigs (≥ 50000 bp)      | 13              | 4               | 22              | 11            | 14                  | 6             | 8             | 15            | 12            | 8             | 2             | 10            | 10            |
| Total length (≥ 0 bp)       | 39562976        | <b>41770782</b> | 39121526        | 39740631      | 38469011            | 41232601      | 40747821      | 39951470      | 39932723      | 40122382      | 40677687      | 39778296      | 39988114      |
| Total length (≥ 1000 bp)    | 31826082        | 31561819        | <b>31942713</b> | 31768142      | 31597457            | 31429606      | 31687664      | 31831542      | 31799582      | 31755892      | 31449067      | 31821983      | 31669381      |
| Total length (≥ 5000 bp)    | 26458220        | 25396302        | <b>27837942</b> | 26343661      | 26237295            | 24743806      | 25962836      | 26857358      | 26371881      | 26231497      | 24731102      | 26427931      | 25757309      |
| Total length (≥ 10000 bp)   | 19170911        | 17745297        | <b>21343647</b> | 19066792      | 19172151            | 16764356      | 18430354      | 19863425      | 19237728      | 18935031      | 16662665      | 19340614      | 18113654      |
| Total length (≥ 25000 bp)   | 6517940         | 5250017         | <b>8675262</b>  | 6214022       | 6368441             | 4733063       | 6056407       | 6908248       | 6445975       | 6072489       | 4278541       | 6430367       | 5568310       |
| Total length (≥ 50000 bp)   | 761378          | 256413          | <b>1300609</b>  | 633021        | 817430              | 356391        | 456768        | 891449        | 707687        | 469569        | 129147        | 604189        | 583509        |
| # contigs                   | 4736            | 5146            | 3993            | 4755          | 4593                | 5367          | 4883          | 4536          | 4742          | 4801          | 5458          | 4722          | 5043          |
| Largest contig              | 69952           | 78911           | <b>83462</b>    | 66569         | 83445               | 69936         | 66569         | 80638         | 68396         | 69938         | 69524         | 69950         | 66579         |
| Total length                | <b>32278872</b> | 32061659        | 32275141        | 32224901      | 31991512            | 31940973      | 32141287      | 32264069      | 32248737      | 32202968      | 32001416      | 32272288      | 32172503      |
| Reference length            | 46709983        | 46709983        | 46709983        | 46709983      | 46709983            | 46709983      | 46709983      | 46709983      | 46709983      | 46709983      | 46709983      | 46709983      | 46709983      |
| GC (%)                      | 40.61           | 40.57           | 40.60           | 40.59         | 40.52               | 40.53         | 40.58         | 40.60         | 40.60         | 40.60         | 40.55         | 40.60         | 40.57         |
| Reference GC (%)            | 42.22           | 42.22           | 42.22           | 42.22         | 42.22               | 42.22         | 42.22         | 42.22         | 42.22         | 42.22         | 42.22         | 42.22         | 42.22         |
| N50                         | 12581           | 11303           | <b>14993</b>    | 12387         | 12711               | 10627         | 11882         | 13052         | 12534         | 12237         | 10400         | 12646         | 11664         |
| NG50                        | 7039            | 6210            | <b>8395</b>     | 7017          | 6960                | 5817          | 6564          | 7422          | 6984          | 6885          | 5803          | 7103          | 6470          |
| N75                         | 6478            | 5751            | <b>7869</b>     | 6377          | 6538                | 5444          | 6124          | 6785          | 6423          | 6331          | 5409          | 6481          | 6021          |
| L50                         | 746             | 829             | <b>632</b>      | 759           | 737                 | 868           | 785           | 715           | 756           | 769           | 903           | 750           | 798           |
| LG50                        | 1513            | 1695            | <b>1274</b>     | 1534          | 1518                | 1808          | 1604          | 1445          | 1525          | 1556          | 1843          | 1510          | 1634          |
| L75                         | 1640            | 1810            | <b>1379</b>     | 1656          | 1612                | 1914          | 1722          | 1564          | 1649          | 1677          | 1959          | 1635          | 1758          |
| # misassemblies             | 51              | 60              | 52              | 77            | 76                  | 44            | 49            | 57            | 68            | 56            | 106           | 66            | 81            |
| # misassembled contigs      | 48              | 58              | 49              | 74            | 73                  | 42            | 47            | 55            | 65            | 54            | 100           | 63            | 79            |
| Misassembled contigs length | 659650          | 594475          | 800208          | 1074952       | 899972              | <b>472393</b> | 669011        | 815815        | 936482        | 707009        | 1290025       | 1022192       | 963237        |
| # local misassemblies       | 76              | 67              | 109             | 73            | 91                  | 68            | 77            | 78            | 76            | 72            | 69            | 76            | <b>66</b>     |
| # structural variations     | 0               | 1               | 0               | 0             | 1                   | 0             | 0             | 0             | 1             | 0             | 0             | 0             | 0             |
| # unaligned mis. contigs    | 2               | 3               | <b>0</b>        | 0             | 1                   | <b>0</b>      | 0             | 2             | 1             | <b>0</b>      | 0             | 2             | 0             |
| # unaligned contigs         | 106 + 22 part   | 123 + 17 part   | 102 + 25 part   | 116 + 19 part | <b>84 + 28 part</b> | 116 + 27 part | 115 + 20 part | 108 + 23 part | 109 + 19 part | 118 + 17 part | 118 + 20 part | 124 + 24 part | 104 + 24 part |
| Unaligned length            | 143652          | 162260          | 142194          | 156455        | <b>125693</b>       | 181182        | 145244        | 150318        | 138623        | 156759        | 154912        | 166104        | 138168        |
| Genome fraction (%)         | <b>68.680</b>   | 68.153          | 68.565          | 68.527        | 68.004              | 67.876        | 68.382        | 68.637        | 68.622        | 68.492        | 68.027        | 68.615        | 68.448        |
| Duplication ratio           | <b>1.002</b>    | <b>1.002</b>    | 1.003           | <b>1.002</b>  | 1.003               | <b>1.002</b>  | <b>1.002</b>  | <b>1.002</b>  | <b>1.002</b>  | <b>1.002</b>  | <b>1.002</b>  | <b>1.002</b>  | <b>1.002</b>  |
| # N's per 100 kbp           | 384.89          | 408.14          | 605.02          | 396.11        | 568.92              | 434.75        | 410.71        | 411.02        | 390.94        | 394.41        | <b>370.62</b> | 397.72        | 395.88        |
| # mismatches per 100 kbp    | 136.06          | 139.06          | 135.48          | 137.33        | 143.15              | 136.86        | 136.10        | <b>133.75</b> | 137.70        | 138.98        | 147.99        | 135.92        | 137.26        |
| # indels per 100 kbp        | 54.77           | 55.70           | 56.20           | 55.33         | 55.66               | 56.15         | 55.37         | 55.33         | 55.54         | 54.97         | 56.07         | 55.09         | <b>54.62</b>  |
| Largest alignment           | 69952           | 78850           | <b>83373</b>    | 66487         | 83356               | 69936         | 66486         | 80577         | 68230         | 69938         | 63517         | 69950         | 66496         |
| Total aligned length        | <b>32088467</b> | 31842867        | 32029480        | 32016988      | 31768444            | 31709911      | 31947406      | 32064852      | 32062277      | 31999522      | 31788360      | 32057890      | 31980829      |
| NA50                        | 12444           | 11114           | <b>14723</b>    | 12151         | 12322               | 10516         | 11679         | 12915         | 12315         | 12013         | 10157         | 12388         | 11431         |
| NGA50                       | 6948            | 6106            | <b>8199</b>     | 6804          | 6788                | 5755          | 6478          | 7278          | 6843          | 6720          | 5635          | 6949          | 6360          |
| NA75                        | 6384            | 5651            | <b>7677</b>     | 6250          | 6390                | 5384          | 6029          | 6662          | 6336          | 6238          | 5273          | 6370          | 5890          |
| LA50                        | 751             | 836             | <b>641</b>      | 771           | 752                 | 875           | 793           | 722           | 764           | 777           | 923           | 761           | 810           |
| LGA50                       | 1529            | 1717            | <b>1298</b>     | 1563          | 1553                | 1823          | 1623          | 1463          | 1546          | 1577          | 1887          | 1536          | 1660          |
| LA75                        | 1657            | 1835            | <b>1406</b>     | 1687          | 1650                | 1931          | 1743          | 1584          | 1673          | 1700          | 2005          | 1664          | 1786          |

## 4.2.7 *C. elegans*

Table 20 contains the Quast report after assembling dataset *C. elegans* with IDBA .

Table 20: Assembly quality metrics for *C. elegans*

| Assembly                        | Uncorrected      | ACE            | BayesHammer     | BFC            | BLESS2                | Blue             | Fiona          | Karect         | Lighter        | Musket         | RACER          | SGA-EC         | Trowl          |
|---------------------------------|------------------|----------------|-----------------|----------------|-----------------------|------------------|----------------|----------------|----------------|----------------|----------------|----------------|----------------|
| # contigs ( $\geq 0$ bp)        | 203415           | 241287         | 191757          | 198118         | 205987                | 222308           | 219816         | 199468         | 212134         | 220202         | 242493         | 204134         | 202600         |
| # contigs ( $\geq 1000$ bp)     | 23820            | 27679          | 23229           | 23760          | 28064                 | 23956            | 25503          | 23606          | 25433          | 26169          | 28621          | 23808          | 23779          |
| # contigs ( $\geq 5000$ bp)     | 5265             | 3822           | 5305            | 5311           | 3471                  | 5287             | 5014           | 5378           | 5078           | 4789           | 3898           | 5288           | 5254           |
| # contigs ( $\geq 10000$ bp)    | 1637             | 741            | 1712            | 1656           | 647                   | 1613             | 1296           | 1684           | 1329           | 1170           | 789            | 1651           | 1644           |
| # contigs ( $\geq 25000$ bp)    | 198              | 69             | 209             | 191            | 59                    | 175              | 125            | 184            | 118            | 117            | 90             | 191            | 195            |
| # contigs ( $\geq 50000$ bp)    | 45               | 9              | 46              | 39             | 5                     | 34               | 24             | 37             | 25             | 27             | 16             | 42             | 45             |
| Total length ( $\geq 0$ bp)     | 11879992         | 114170074      | 117537858       | 118214042      | 109961204             | <b>119444609</b> | 118285707      | 118290696      | 118387916      | 118072643      | 118233003      | 118714248      | 118615563      |
| Total length ( $\geq 1000$ bp)  | <b>96127803</b>  | 85118518       | 95937053        | 96044197       | 82706061              | 95020272         | 93069114       | 96009464       | 93691897       | 92334252       | 87446335       | 96076605       | 95035042       |
| Total length ( $\geq 5000$ bp)  | 53843135         | 32228425       | <b>55090132</b> | 53980078       | 28994075              | 52574207         | 46636697       | 54131678       | 47273617       | 44165284       | 33627639       | 53830727       | 53633067       |
| Total length ( $\geq 10000$ bp) | 28768855         | 11598907       | <b>30181631</b> | 28686276       | 10153864              | 27119766         | 21103125       | 28524948       | 21543242       | 19282752       | 12875429       | 28667755       | 28646245       |
| Total length ( $\geq 25000$ bp) | 8569575          | 2562224        | <b>8944599</b>  | 8082901        | 2063112               | 6905329          | 5001497        | 7424989        | 4707794        | 4885306        | 3436135        | 8148320        | 8344784        |
| Total length ( $\geq 50000$ bp) | 3442593          | 559485         | <b>3548962</b>  | 3017440        | 283191                | 2283060          | 1670884        | 2574568        | 1568823        | 1916567        | 1002804        | 3236938        | 3446748        |
| # contigs                       | 33262            | 41130          | 32320           | 33118          | 42334                 | 35807            | 36584          | 32950          | 36368          | 37821          | 43721          | 33173          | 33241          |
| Largest contig                  | 158036           | 81042          | <b>161446</b>   | 159367         | 64717                 | 106190           | 139294         | 139293         | 80140          | 139290         | 82845          | 138754         | 158036         |
| Total length                    | <b>102988100</b> | 94836365       | 102510189       | 102842496      | 93926396              | 102180282        | 101021330      | 102718424      | 101630228      | 100768560      | 98311793       | 102877857      | 102814415      |
| Reference length                | 100286070        | 100286070      | 100286070       | 100286070      | 100286070             | 100286070        | 100286070      | 100286070      | 100286070      | 100286070      | 100286070      | 100286070      | 100286070      |
| GC (%)                          | 38.56            | 38.56          | 38.52           | 38.55          | 38.52                 | 38.54            | 38.49          | 38.52          | 38.38          | 38.57          | 38.75          | 38.56          | 38.57          |
| Reference GC (%)                | 35.44            | 35.44          | 35.44           | 35.44          | 35.44                 | 35.44            | 35.44          | 35.44          | 35.44          | 35.44          | 35.44          | 35.44          | 35.44          |
| N50                             | 5329             | 3414           | <b>5560</b>     | 5365           | 3178                  | 5208             | 4532           | 5400           | 4594           | 4285           | 3390           | 5329           | 5302           |
| NG50                            | 5534             | 3187           | <b>5756</b>     | 5547           | 2898                  | 5345             | 4581           | 5575           | 4657           | 4306           | 3304           | 5534           | 5509           |
| N75                             | 2461             | 1766           | <b>2531</b>     | 2474           | 1665                  | 2399             | 2169           | 2491           | 2201           | 2074           | 1685           | 2469           | 2461           |
| NG75                            | 2639             | 1534           | <b>2690</b>     | 2650           | 1376                  | 2527             | 2210           | 2662           | 2278           | 2099           | 1603           | 2640           | 2629           |
| L50                             | 4810             | 7512           | <b>4580</b>     | 4817           | 7916                  | 4997             | 5828           | 4844           | 5818           | 6134           | 7711           | 4825           | 4822           |
| LG50                            | 4561             | 8338           | <b>4381</b>     | 4583           | 9111                  | 4817             | 5747           | 4623           | 5674           | 6078           | 8006           | 4587           | 4588           |
| L75                             | 11969            | 17217          | <b>11458</b>    | 11921          | 18907                 | 12253            | 13928          | 11886          | 13827          | 14651          | 18076          | 11956          | 11958          |
| LG75                            | 11174            | 19698          | <b>10810</b>    | 11171          | 21694                 | 11675            | 13676          | 11177          | 13379          | 14477          | 18977          | 11194          | 11212          |
| # misassemblies                 | <b>598</b>       | 1860           | 721             | 990            | 657                   | 1678             | 990            | 675            | 830            | 1435           | 2774           | 665            | 628            |
| # misassembled contigs          | <b>594</b>       | 1787           | 708             | 654            | 1635                  | 740              | 975            | 669            | 818            | 1380           | 2642           | 658            | 620            |
| Misassembled contigs length     | <b>3122101</b>   | 6343367        | 4041907         | 3343362        | 5160442               | 3652768          | 4258832        | 3495943        | 3923723        | 5540661        | 8112551        | 3344928        | 3242140        |
| # local misassemblies           | 169              | 175            | 176             | 169            | 193                   | 159              | 179            | 166            | 174            | 185            | <b>120</b>     | 167            | 165            |
| # unaligned mis. contigs        | 1                | 1              | <b>0</b>        | <b>0</b>       | <b>0</b>              | <b>0</b>         | <b>0</b>       | <b>0</b>       | <b>0</b>       | <b>0</b>       | <b>0</b>       | 1              | 1              |
| # unaligned contigs             | 4673 + 21 part   | 4271 + 42 part | 4009 + 31 part  | 4709 + 22 part | <b>3856 + 42 part</b> | 4049 + 28 part   | 5128 + 40 part | 4783 + 29 part | 5175 + 33 part | 5273 + 32 part | 5215 + 36 part | 4690 + 23 part | 4699 + 21 part |
| Unaligned length                | 15457774         | 13185257       | 15271613        | 15438170       | <b>12771896</b>       | 15253161         | 14748271       | 15321756       | 14650845       | 14909845       | 14753767       | 15464643       | 15423697       |
| Genome fraction (%)             | <b>87.069</b>    | 81.060         | 86.857          | 86.948         | 79.860                | 86.459           | 85.771         | 86.946         | 86.467         | 85.306         | 82.599         | 86.948         | 86.934         |
| Duplication ratio               | <b>1.002</b>     | 1.004          | <b>1.002</b>    | <b>1.002</b>   | <b>1.002</b>          | 1.003            | <b>1.003</b>   | <b>1.002</b>   | 1.003          | 1.004          | <b>1.002</b>   | <b>1.002</b>   | <b>1.002</b>   |
| # N's per 100 kbp               | <b>0.00</b>      | <b>0.00</b>    | <b>0.00</b>     | <b>0.00</b>    | 8.93                  | <b>0.00</b>      | <b>0.00</b>    | <b>0.00</b>    | <b>0.00</b>    | <b>0.00</b>    | <b>0.00</b>    | <b>0.00</b>    | <b>0.00</b>    |
| # mismatches per 100 kbp        | <b>15.40</b>     | 44.37          | 15.81           | 17.49          | 22.64                 | 17.76            | 47.72          | 17.15          | 45.84          | 110.51         | 101.37         | 16.20          | 15.46          |
| # indels per 100 kbp            | <b>8.60</b>      | 12.72          | 9.59            | 8.80           | 11.48                 | 9.26             | 16.91          | 8.68           | 9.11           | 11.10          | 25.60          | 8.63           | 8.65           |
| Largest alignment               | 51074            | 23778          | <b>51077</b>    | 51069          | 22624                 | 40495            | 40508          | 51069          | 36434          | 36039          | 33712          | 40497          | 51069          |
| Total aligned length            | <b>87429792</b>  | 81366347       | 87191165        | 87306376       | 80143767              | 86810073         | 86135010       | 87297553       | 86834040       | 85673728       | 83041928       | 87307082       | 87296550       |
| NA50                            | 3974             | 2519           | <b>4112</b>     | 3992           | 2352                  | 3889             | 3414           | 4039           | 3495           | 3181           | 2413           | 3975           | 3977           |
| NGA50                           | 4132             | 2329           | <b>4241</b>     | 4140           | 2123                  | 4008             | 3451           | 4181           | 3567           | 3202           | 2348           | 4131           | 4124           |
| NA75                            | 1382             | 1060           | <b>1422</b>     | 1388           | 1024                  | 1354             | 1258           | 1403           | 1309           | 1188           | 937            | 1382           | 1381           |
| NGA75                           | 1561             | 833            | <b>1582</b>     | 1557           | 750                   | 1474             | 1299           | 1569           | 1382           | 1212           | 864            | 1555           | 1545           |
| LA50                            | 6644             | 10118          | <b>6360</b>     | 6600           | 10701                 | 6699             | 7679           | 6505           | 7608           | 8167           | 10642          | 6629           | 6637           |
| LGA50                           | 6310             | 11243          | <b>6090</b>     | 6285           | 12326                 | 6459             | 7572           | 6210           | 7419           | 8092           | 11056          | 6309           | 6325           |
| LA75                            | 17451            | 24444          | <b>16788</b>    | 17359          | 25515                 | 17681            | 19681          | 17121          | 19304          | 20936          | 26838          | 17429          | 17429          |
| LGA75                           | 16071            | 28787          | <b>15663</b>    | 16054          | 31704                 | 16676            | 19249          | 15890          | 18560          | 20635          | 28482          | 16103          | 16131          |

## 4.2.8 *D. melanogaster*

Table 21 contains the Quast report after assembling dataset *D. melanogaster* with IDBA .

Table 21: Assembly quality metrics for *D. melanogaster*

| Assembly                        | Uncorrected     | ACE             | BayesHammer     | BFC             | BLESS2                 | Blue            | Fiona           | Karect           | Lighter         | Musket          | RACER           | SGA-EC           | Trowel          |
|---------------------------------|-----------------|-----------------|-----------------|-----------------|------------------------|-----------------|-----------------|------------------|-----------------|-----------------|-----------------|------------------|-----------------|
| # contigs ( $\geq 0$ bp)        | 223581          | 248508          | 208606          | 219200          | 150809                 | 232478          | 225631          | 204944           | 227250          | 213768          | 210008          | 227076           | 216608          |
| # contigs ( $\geq 1000$ bp)     | 10040           | 11133           | 9629            | 9629            | 9643                   | 9643            | 8912            | 8550             | 9507            | 8784            | 10450           | 9914             | 9747            |
| # contigs ( $\geq 5000$ bp)     | 4821            | 5486            | 4549            | 4709            | 5244                   | 4582            | 4630            | 4330             | 4750            | 4656            | 5536            | 4800             | 4796            |
| # contigs ( $\geq 10000$ bp)    | 2952            | 3223            | 2830            | 2836            | 3387                   | 2851            | 3031            | 2851             | 2985            | 3149            | 3487            | 2913             | 2935            |
| # contigs ( $\geq 25000$ bp)    | 1174            | 1065            | 1180            | 1183            | 1222                   | 1169            | 1235            | 1193             | 1305            | 1179            | 1385            | 1181             | 1177            |
| # contigs ( $\geq 50000$ bp)    | 386             | 292             | 435             | 412             | 338                    | 413             | 429             | 482              | 403             | 431             | 292             | 395              | 405             |
| Total length ( $\geq 0$ bp)     | 136848302       | 136462329       | 135724785       | 136392768       | 127932504              | 136892327       | 136300390       | 135379354        | 136339660       | 135162866       | 134486672       | <b>137098799</b> | 136237946       |
| Total length ( $\geq 1000$ bp)  | 114247383       | 112818345       | 114082986       | 114339445       | 113270501              | 113759034       | 114780121       | <b>115028366</b> | 114022280       | 114743642       | 114639046       | 114134174        | 114341269       |
| Total length ( $\geq 5000$ bp)  | 101715090       | 98832982        | 102305243       | 102547056       | 103248114              | 101718710       | 104544426       | <b>105023741</b> | 102447259       | 104854744       | 102687782       | 101822912        | 10245498        |
| Total length ( $\geq 10000$ bp) | 83402861        | 83037559        | 90155509        | 89922555        | 89623586               | 89450070        | 93072964        | <b>94439411</b>  | 89850423        | 93085779        | 88061113        | 88377312         | 80177890        |
| Total length ( $\geq 25000$ bp) | 60421211        | 48860642        | 64093407        | 62278840        | 5529759                | 63079258        | 64942162        | <b>68852849</b>  | 61545757        | 64708831        | 51593221        | 61036917         | 61248879        |
| Total length ( $\geq 50000$ bp) | 32991908        | 22560206        | 38363554        | 35361693        | 24899345               | 36643703        | 36921083        | <b>42374171</b>  | 34077796        | 34198243        | 20727594        | 33514313         | 34119167        |
| # contigs                       | 13390           | 13999           | 12526           | 12905           | 11272                  | 12987           | 11912           | 11595            | 12438           | 11844           | 13716           | 13298            | 13078           |
| Largest contig                  | 444298          | 390345          | 429926          | 357542          | 390331                 | 444337          | 408728          | <b>444753</b>    | 444255          | 418612          | 197844          | 444372           | 390304          |
| Total length                    | 116592521       | 114830494       | 116237827       | 116630464       | 114687356              | 116107506       | 116882147       | <b>117162385</b> | 116068379       | 116889766       | 116922349       | 116504780        | 116670858       |
| Reference length                | 120381546       | 120381546       | 120381546       | 120381546       | 120381546              | 120381546       | 120381546       | 120381546        | 120381546       | 120381546       | 120381546       | 120381546        | 120381546       |
| GC (%)                          | 42.60           | 42.60           | 42.59           | 42.59           | 42.61                  | 42.60           | 42.59           | 42.56            | 42.61           | 42.60           | 42.60           | 42.59            | 42.60           |
| Reference GC (%)                | 42.42           | 42.42           | 42.42           | 42.42           | 42.42                  | 42.42           | 42.42           | 42.42            | 42.42           | 42.42           | 42.42           | 42.42            | 42.42           |
| N50                             | 26455           | 29434           | 29434           | 27934           | 24997                  | 28588           | 29541           | <b>33231</b>     | 27319           | 29410           | 21563           | 26890            | 27164           |
| NG50                            | 25129           | 18885           | 27801           | 26470           | 22588                  | 27150           | 28304           | <b>31616</b>     | 25898           | 28045           | 20684           | 25447            | 25730           |
| N75                             | 10391           | 8873            | 11384           | 11024           | 11346                  | 11024           | 12504           | <b>13413</b>     | 11183           | 12753           | 10116           | 10445            | 10768           |
| NG75                            | 9291            | 7545            | 9923            | 9797            | 9844                   | 9590            | 11211           | <b>12008</b>     | 9794            | 11724           | 9183            | 9215             | 9506            |
| L50                             | 1092            | 1414            | 960             | 1053            | 1309                   | 982             | 1015            | <b>880</b>       | 1059            | 1074            | 1475            | 1074             | 1066            |
| LG50                            | 1165            | 1586            | 1032            | 1102            | 1431                   | 1058            | 1075            | <b>930</b>       | 1140            | 1135            | 1557            | 1148             | 1136            |
| L75                             | 2858            | 3592            | 2552            | 2703            | 3031                   | 2626            | 2548            | <b>2282</b>      | 2721            | 2992            | 3456            | 2816             | 2774            |
| LG75                            | 3149            | 4101            | 2844            | 2973            | 3434                   | 2936            | 2769            | <b>2472</b>      | 3030            | 2807            | 3726            | 3113             | 3049            |
| # misassemblies                 | <b>626</b>      | 698             | 628             | 664             | 748                    | 670             | 668             | 647              | 640             | 672             | 967             | 639              | 670             |
| # misassembled contigs          | 557             | 642             | <b>553</b>      | 590             | 686                    | 563             | 581             | 568              | 574             | 609             | 868             | 568              | 600             |
| Misassembled contigs length     | 2102368         | <b>17912825</b> | 22874463        | 22837094        | 18568193               | 24054399        | 22543860        | 25176362         | 21592728        | 21660938        | 21288114        | 21894291         | 22474232        |
| # local misassemblies           | 3655            | 3730            | 3808            | 3708            | <b>1908</b>            | 3652            | 3435            | 3277             | 3582            | 2808            | 2638            | 3836             | 3560            |
| # unaligned mis. contigs        | 31              | 21              | 25              | 28              | 5                      | 30              | 20              | 16               | 26              | 16              | 9               | 38               | 29              |
| # unaligned contigs             | 4185 + 473 part | 3304 + 583 part | 3948 + 540 part | 4139 + 549 part | <b>2271 + 264 part</b> | 4081 + 571 part | 3046 + 429 part | 4065 + 412 part  | 3633 + 499 part | 3884 + 353 part | 4014 + 348 part | 4191 + 527 part  | 4139 + 470 part |
| Unaligned length                | 7951307         | 7080437         | 8027856         | 8020296         | <b>4491455</b>         | 7896518         | 7404636         | 7344462          | 6897357         | 6814426         | 8129395         | 7896669          | 7896669         |
| Genome fraction (%)             | 90.330          | 89.613          | 90.020          | 90.317          | <b>91.527</b>          | 89.995          | 91.010          | 91.072           | 90.402          | 91.406          | 91.440          | 90.111           | 90.431          |
| Duplication ratio               | <b>0.999</b>    | <b>0.999</b>    | <b>0.999</b>    | <b>0.999</b>    | 1.000                  | <b>0.999</b>    | <b>0.999</b>    | <b>0.999</b>     | <b>0.999</b>    | 1.000           | 1.000           | <b>0.999</b>     | <b>0.999</b>    |
| # N's per 100 kbp               | 8.65            | 7.31            | 7.22            | 49.90           | 7.18                   | 6.37            | 5.91            | 7.00             | 5.91            | 7.00            | 3.87            | 7.67             | 7.76            |
| # mismatches per 100 kbp        | 516.84          | 520.94          | <b>513.77</b>   | 519.00          | 545.03                 | 517.06          | 529.10          | 524.86           | 521.12          | 551.98          | 550.98          | 516.38           | 519.40          |
| # indels per 100 kbp            | 130.93          | 131.77          | <b>130.35</b>   | 132.28          | 141.13                 | 130.74          | 134.60          | 131.52           | 131.03          | 134.06          | 141.09          | 130.55           | 131.89          |
| Largest alignment               | 258232          | 202757          | <b>259408</b>   | 258275          | 181773                 | 258234          | 258107          | 258280           | 227789          | 258274          | 186904          | 258194           | 205327          |
| Total aligned length            | 108390962       | 107468245       | 107979664       | 108367980       | <b>1099936320</b>      | 107999203       | 109234193       | 109329923        | 108475965       | 109736421       | 109757147       | 10847804         | 10852668        |
| NA50                            | 23563           | 18425           | 25924           | 24533           | 21970                  | 23239           | 26026           | <b>28465</b>     | 24293           | 25797           | 19085           | 23965            | 23998           |
| NGA50                           | 22381           | 17101           | 24534           | 23383           | 20512                  | 23825           | 24990           | <b>27415</b>     | 23152           | 24610           | 18420           | 22825            | 22928           |
| NA75                            | 8961            | 7631            | 9768            | 9426            | 10121                  | 9434            | 10704           | <b>11407</b>     | 9649            | 11103           | 8537            | 8938             | 9195            |
| NGA75                           | 7823            | 6313            | 8263            | 8230            | 8624                   | 8044            | 9575            | <b>10244</b>     | 8239            | 10032           | 7664            | 7801             | 8075            |
| LA50                            | 1253            | 1617            | 1124            | 1202            | 1453                   | 1154            | 1170            | <b>1037</b>      | 1220            | 1225            | 1661            | 1241             | 1233            |
| LGA50                           | 1335            | 1774            | 1206            | 1280            | 1587                   | 1242            | 1259            | <b>1094</b>      | 1311            | 1294            | 1753            | 1324             | 1312            |
| LA75                            | 3254            | 4034            | 2838            | 3107            | 3367                   | 3035            | 2911            | <b>2839</b>      | 3101            | 2943            | 3928            | 3224             | 3181            |
| LGA75                           | 3595            | 4634            | 3283            | 3426            | 3824                   | 3403            | 3170            | <b>2862</b>      | 3463            | 3192            | 4249            | 3573             | 3501            |

## 4.3 SPAdes

### 4.3.1 *B. dentium*

Table 22 contains the Quast report after assembling dataset *B. dentium* with SPAdes .

Table 22: Assembly quality metrics for *B. dentium*

| Assembly                        | Uncorrected  | ACE                | BayesHammer  | BFC            | BLESS2         | Blue           | Fiona        | Karect       | Lighter        | Musket       | RACER        | SGA-EC       | Trowel       |
|---------------------------------|--------------|--------------------|--------------|----------------|----------------|----------------|--------------|--------------|----------------|--------------|--------------|--------------|--------------|
| # contigs ( $\geq 0$ bp)        | 1688         | 278                | 1653         | 1684           | 887            | 1664           | 1637         | 1680         | 1666           | 1682         | 1658         | 1678         | 1680         |
| # contigs ( $\geq 1000$ bp)     | 56           | 15                 | 54           | 62             | 37             | 68             | 49           | 53           | 56             | 54           | 57           | 58           | 61           |
| # contigs ( $\geq 5000$ bp)     | 12           | 12                 | 12           | 12             | 13             | 12             | 12           | 12           | 12             | 12           | 12           | 12           | 12           |
| # contigs ( $\geq 10000$ bp)    | 11           | 11                 | 11           | 11             | 11             | 11             | 11           | 11           | 11             | 11           | 11           | 11           | 11           |
| # contigs ( $\geq 25000$ bp)    | 11           | 11                 | 11           | 11             | 11             | 11             | 11           | 11           | 11             | 11           | 11           | 11           | 11           |
| # contigs ( $\geq 50000$ bp)    | 9            | 9                  | 9            | 9              | 9              | 9              | 9            | 9            | 9              | 9            | 9            | 9            | 9            |
| Total length ( $\geq 0$ bp)     | 3518219      | 2733900            | 3503386      | <b>3522389</b> | 3046753        | 3518493        | 3487142      | 3514203      | 3507178        | 3516367      | 3503223      | 3516842      | 3522183      |
| Total length ( $\geq 1000$ bp)  | 2675554      | 2614800            | 2673009      | 2681531        | 2652461        | <b>2693555</b> | 2659416      | 2669659      | 2673430        | 2671485      | 2672971      | 2679544      | 2684632      |
| Total length ( $\geq 5000$ bp)  | 2610109      | 2610110            | 2610110      | 2610111        | <b>2615377</b> | 2610110        | 2610111      | 2610110      | 2610112        | 2610110      | 2610110      | 2610109      | 2610109      |
| Total length ( $\geq 10000$ bp) | 2604505      | 2604506            | 2604506      | 2604507        | 2604505        | 2604506        | 2604507      | 2604506      | <b>2604508</b> | 2604506      | 2604506      | 2604505      | 2604505      |
| Total length ( $\geq 25000$ bp) | 2604505      | 2604506            | 2604506      | 2604507        | 2604505        | 2604506        | 2604507      | 2604506      | <b>2604508</b> | 2604506      | 2604506      | 2604505      | 2604505      |
| Total length ( $\geq 50000$ bp) | 2521362      | 2521363            | 2521363      | 2521364        | 2521362        | 2521363        | 2521364      | 2521363      | <b>2521365</b> | 2521363      | 2521363      | 2521362      | 2521362      |
| # contigs                       | 821          | 66                 | 830          | 839            | 204            | 832            | 825          | 839          | 821            | 841          | 832          | 826          | 829          |
| Largest contig                  | 610215       | 610215             | 610215       | 610215         | 610215         | 610215         | 610215       | 610215       | 610215         | 610215       | 610215       | 610215       | 610215       |
| Total length                    | 3139081      | 2643783            | 3142820      | 3152040        | 2755449        | <b>3153640</b> | 3128460      | 3145410      | 3136958        | 3147715      | 3142543      | 3143479      | 3149960      |
| Reference length                | 2636367      | 2636367            | 2636367      | 2636367        | 2636367        | 2636367        | 2636367      | 2636367      | 2636367        | 2636367      | 2636367      | 2636367      | 2636367      |
| GC (%)                          | 58.90        | 58.47              | 58.90        | 58.89          | 58.45          | 58.88          | 58.90        | 58.90        | 58.89          | 58.89        | 58.89        | 58.90        | 58.86        |
| Reference GC (%)                | 58.54        | 58.54              | 58.54        | 58.54          | 58.54          | 58.54          | 58.54        | 58.54        | 58.54          | 58.54        | 58.54        | 58.54        | 58.54        |
| N50                             | 287948       | <b>397392</b>      | 287949       | 287949         | <b>397392</b>  | 287948         | 287949       | 287949       | 287949         | 287949       | 287948       | 287948       | 287948       |
| NG50                            | 397392       | 397392             | 397392       | 397392         | 397392         | 397392         | 397392       | 397392       | 397392         | 397392       | 397392       | 397392       | 397392       |
| N75                             | 158502       | <b>177423</b>      | 158502       | 158502         | <b>177423</b>  | 158502         | 158502       | 158502       | 158502         | 158502       | 158502       | 158502       | 158502       |
| NG75                            | 177423       | 177423             | 177423       | 177423         | 177423         | 177423         | 177423       | 177423       | 177423         | 177423       | 177423       | 177423       | 177423       |
| L50                             | 4            | 3                  | 4            | 4              | 3              | 4              | 4            | 4            | 4              | 4            | 4            | 4            | 4            |
| LG50                            | 3            | 3                  | 3            | 3              | 3              | 3              | 3            | 3            | 3              | 3            | 3            | 3            | 3            |
| L75                             | 8            | 6                  | 8            | 8              | 6              | 8              | 8            | 8            | 8              | 8            | 8            | 8            | 8            |
| LG75                            | 6            | 6                  | 6            | 6              | 6              | 6              | 6            | 6            | 6              | 6            | 6            | 6            | 6            |
| # misassemblies                 | 0            | 0                  | 0            | 0              | 0              | 0              | 0            | 0            | 0              | 0            | 0            | 0            | 0            |
| # misassembled contigs          | 0            | 0                  | 0            | 0              | 0              | 0              | 0            | 0            | 0              | 0            | 0            | 0            | 0            |
| Misassembled contigs length     | 0            | 0                  | 0            | 0              | 0              | 0              | 0            | 0            | 0              | 0            | 0            | 0            | 0            |
| # local misassemblies           | 3            | 3                  | 3            | 3              | 3              | 3              | 3            | 3            | 3              | 3            | 3            | 3            | 3            |
| # unaligned mis. contigs        | 0            | 7                  | 1            | 0              | 0              | 0              | 0            | 0            | 0              | 0            | 0            | 0            | 0            |
| # unaligned contigs             | 805 + 2 part | <b>34 + 2 part</b> | 815 + 1 part | 824 + 1 part   | 190 + 0 part   | 816 + 2 part   | 811 + 0 part | 823 + 1 part | 805 + 2 part   | 824 + 2 part | 815 + 3 part | 811 + 1 part | 814 + 1 part |
| Unaligned length                | 525292       | <b>21151</b>       | 529055       | 538427         | 141937         | 539856         | 514946       | 531251       | 523118         | 533413       | 528712       | 529836       | 536304       |
| Genome fraction (%)             | 99.094       | 99.094             | 99.094       | 99.094         | 99.094         | 99.094         | 99.094       | 99.094       | 99.094         | 99.094       | 99.094       | 99.094       | 99.094       |
| Duplication ratio               | 1.001        | 1.004              | <b>1.000</b> | <b>1.000</b>   | <b>1.000</b>   | 1.001          | <b>1.000</b> | 1.001        | 1.001          | 1.001        | 1.001        | <b>1.000</b> | <b>1.000</b> |
| # N's per 100 kbp               | 0.00         | 0.00               | 0.00         | 0.00           | 0.00           | 0.00           | 0.00         | 0.00         | 0.00           | 0.00         | 0.00         | 0.00         | 0.00         |
| # mismatches per 100 kbp        | <b>0.23</b>  | <b>0.23</b>        | 0.27         | <b>0.23</b>    | <b>0.23</b>    | 0.31           | 0.27         | <b>0.23</b>  | <b>0.23</b>    | 0.27         | 0.27         | <b>0.23</b>  | 0.27         |
| # indels per 100 kbp            | 0.27         | 0.31               | 0.31         | 0.27           | 0.27           | <b>0.23</b>    | 0.27         | 0.31         | 0.31           | 0.31         | <b>0.23</b>  | 0.27         | 0.27         |
| Largest alignment               | 610215       | 610215             | 610215       | 610215         | 610215         | 610215         | 610215       | 610215       | 610215         | 610215       | 610215       | 610215       | 610215       |
| Total aligned length            | 2613514      | <b>2615318</b>     | 2613490      | 2613338        | 2613237        | 2613509        | 2613239      | 2613445      | 2613565        | 2613554      | 2613556      | 2613368      | 2613381      |
| NA50                            | 287948       | <b>397392</b>      | 287949       | 287949         | <b>397392</b>  | 287948         | 287949       | 287949       | 287949         | 287949       | 287948       | 287948       | 287948       |
| NGA50                           | 397392       | 397392             | 397392       | 397392         | 397392         | 397392         | 397392       | 397392       | 397392         | 397392       | 397392       | 397392       | 397392       |
| NA75                            | 158502       | <b>177423</b>      | 158502       | 158502         | <b>177423</b>  | 158502         | 158502       | 158502       | 158502         | 158502       | 158502       | 158502       | 158502       |
| NGA75                           | 177423       | 177423             | 177423       | 177423         | 177423         | 177423         | 177423       | 177423       | 177423         | 177423       | 177423       | 177423       | 177423       |
| LA50                            | 4            | 3                  | 4            | 4              | 3              | 4              | 4            | 4            | 4              | 4            | 4            | 4            | 4            |
| LGA50                           | 3            | 3                  | 3            | 3              | 3              | 3              | 3            | 3            | 3              | 3            | 3            | 3            | 3            |
| LA75                            | 8            | 6                  | 8            | 8              | 6              | 8              | 8            | 8            | 8              | 8            | 8            | 8            | 8            |
| LGA75                           | 6            | 6                  | 6            | 6              | 6              | 6              | 6            | 6            | 6              | 6            | 6            | 6            | 6            |

### 4.3.2 *E. coli* str. *K-12* substr. *DH10B*

Table 23 contains the Quast report after assembling dataset *E. coli* str. *K-12* substr. *DH10B* with SPAdes .

Table 23: Assembly quality metrics for *E. coli* str. *K-12* substr. *DH10B*

| Assembly                    | Uncorrected    | ACE            | BayesHammer    | BFC            | BLESS2        | Blue         | Fiona        | Karect       | Lighter        | Musket       | RACER        | SGA-EC       | Trowel       |
|-----------------------------|----------------|----------------|----------------|----------------|---------------|--------------|--------------|--------------|----------------|--------------|--------------|--------------|--------------|
| # contigs (≥ 0 bp)          | 186            | 117            | 109            | 125            | 114           | 122          | 116          | 114          | 112            | 121          | 121          | 134          | 134          |
| # contigs (≥ 1000 bp)       | 79             | 79             | 78             | 79             | 78            | 79           | 79           | 81           | 78             | 79           | 79           | 79           | 78           |
| # contigs (≥ 5000 bp)       | 61             | 62             | 61             | 62             | 62            | 61           | 61           | 61           | 61             | 62           | 62           | 61           | 61           |
| # contigs (≥ 10000 bp)      | 54             | 55             | 54             | 55             | 55            | 54           | 54           | 54           | 54             | 55           | 55           | 54           | 54           |
| # contigs (≥ 25000 bp)      | 49             | 49             | 49             | 49             | 49            | 49           | 49           | 49           | 49             | 49           | 49           | 49           | 49           |
| # contigs (≥ 50000 bp)      | 29             | 28             | 29             | 28             | 28            | 29           | 29           | 29           | 29             | 28           | 28           | 29           | 29           |
| Total length (≥ 0 bp)       | <b>4390611</b> | 4373352        | 4372108        | 4375195        | 4372035       | 4372602      | 4372343      | 4372889      | 4372776        | 4373454      | 4373398      | 4376447      | 4377075      |
| Total length (≥ 1000 bp)    | 4365674        | <b>4366114</b> | 4365888        | 4366067        | 4364378       | 4363735      | 4365099      | 4365206      | 4365467        | 4365245      | 4365002      | 4365146      | 4365776      |
| Total length (≥ 5000 bp)    | 4325946        | 4328231        | 4327992        | <b>4328283</b> | 4327750       | 4323821      | 4325928      | 4319347      | 4327639        | 4327413      | 4327169      | 4325543      | 4327967      |
| Total length (≥ 10000 bp)   | 4269540        | 4271604        | 4271516        | <b>4271867</b> | 4271647       | 4267470      | 4269394      | 4262831      | 4271107        | 4270997      | 4270753      | 4269127      | 4271551      |
| Total length (≥ 25000 bp)   | 4192073        | 4178567        | <b>4194081</b> | 4178971        | 4178836       | 4190037      | 4191951      | 4185397      | 4193674        | 4178118      | 4177918      | 4191660      | 4194019      |
| Total length (≥ 50000 bp)   | 3456316        | 3395882        | 3455789        | 3396435        | 3396228       | 3455430      | 3453075      | 3453758      | <b>3459882</b> | 3395638      | 3395515      | 3453555      | 3455950      |
| # contigs                   | 83             | 82             | 81             | 82             | 81            | 82           | 81           | 84           | 81             | 82           | 82           | 82           | 81           |
| Largest contig              | 326373         | 326271         | 326372         | 326373         | <b>326386</b> | 326277       | 326373       | 326372       | 326372         | 326372       | 326369       | 326373       | 326373       |
| Total length                | <b>4368476</b> | 4368165        | 4367939        | 4368118        | 4366425       | 4365851      | 4366547      | 4367646      | 4367518        | 4367296      | 4367053      | 4367197      | 4367827      |
| Reference length            | 4686137        | 4686137        | 4686137        | 4686137        | 4686137       | 4686137      | 4686137      | 4686137      | 4686137        | 4686137      | 4686137      | 4686137      | 4686137      |
| GC (%)                      | 50.75          | 50.75          | 50.75          | 50.75          | 50.75         | 50.75        | 50.75        | 50.75        | 50.75          | 50.75        | 50.75        | 50.75        | 50.75        |
| Reference GC (%)            | 50.78          | 50.78          | 50.78          | 50.78          | 50.78         | 50.78        | 50.78        | 50.78        | 50.78          | 50.78        | 50.78        | 50.78        | 50.78        |
| N50                         | 108254         | 108227         | <b>108384</b>  | 108254         | 108254        | 107774       | 107813       | 108228       | 107839         | 107839       | 107839       | 108254       | 108254       |
| NG50                        | <b>97353</b>   | <b>97353</b>   | <b>97353</b>   | <b>97353</b>   | <b>97353</b>  | 97288        | <b>97353</b> | <b>97353</b> | <b>97353</b>   | <b>97353</b> | <b>97353</b> | <b>97353</b> | <b>97353</b> |
| N75                         | <b>57964</b>   | 57170          | <b>57964</b>   | 57170          | 57147         | <b>57964</b> | <b>57964</b> | <b>57964</b> | <b>57964</b>   | 57170        | 57147        | <b>57964</b> | <b>57964</b> |
| NG75                        | <b>46124</b>   | 45930          | <b>46124</b>   | 45889          | 45849         | 45891        | <b>46124</b> | 45941        | <b>46124</b>   | 45889        | 45889        | <b>46124</b> | <b>46124</b> |
| L50                         | 13             | 13             | 13             | 13             | 13            | 13           | 13           | 13           | 13             | 13           | 13           | 13           | 13           |
| LG50                        | 14             | 14             | 14             | 14             | 14            | 14           | 14           | 14           | 14             | 14           | 14           | 14           | 14           |
| L75                         | 26             | 26             | 26             | 26             | 26            | 26           | 26           | 26           | 26             | 26           | 26           | 26           | 26           |
| LG75                        | 31             | 31             | 31             | 31             | 31            | 31           | 31           | 31           | 31             | 31           | 31           | 31           | 31           |
| # misassemblies             | 0              | 0              | 0              | 0              | 0             | 1            | 0            | 0            | 1              | 0            | 0            | 0            | 0            |
| # misassembled contigs      | 0              | 0              | 0              | 0              | 0             | 1            | 0            | 0            | 1              | 0            | 0            | 0            | 0            |
| Misassembled contigs length | 0              | 0              | 0              | 0              | 0             | 188639       | 0            | 0            | 91840          | 0            | 0            | 0            | 0            |
| # local misassemblies       | 7              | 8              | 10             | 8              | 8             | 6            | 7            | 8            | 7              | 7            | 7            | 10           | 10           |
| # structural variations     | 0              | 0              | 0              | 0              | 0             | 0            | 0            | 0            | 0              | 0            | 0            | 0            | 0            |
| # unaligned mis. contigs    | 0              | 0              | 0              | 0              | 0             | 0            | 0            | 0            | 0              | 0            | 0            | 0            | 0            |
| # unaligned contigs         | 0 + 0 part     | 0 + 0 part     | 0 + 0 part     | 0 + 0 part     | 0 + 0 part    | 0 + 0 part   | 0 + 0 part   | 0 + 0 part   | 0 + 0 part     | 0 + 0 part   | 0 + 0 part   | 0 + 0 part   | 0 + 0 part   |
| Unaligned length            | 0              | 0              | 0              | 0              | 0             | 0            | 0            | 0            | 0              | 0            | 0            | 0            | 0            |
| Genome fraction (%)         | <b>93.179</b>  | 93.161         | 93.172         | 93.174         | 93.139        | 93.136       | 93.149       | 93.163       | 93.168         | 93.161       | 93.157       | 93.157       | 93.167       |
| Duplication ratio           | <b>1.000</b>   | 1.001          | <b>1.000</b>   | <b>1.000</b>   | <b>1.000</b>  | <b>1.000</b> | <b>1.000</b> | <b>1.000</b> | <b>1.000</b>   | <b>1.000</b> | <b>1.000</b> | <b>1.000</b> | <b>1.000</b> |
| # N's per 100 kbp           | 5.08           | 4.85           | <b>0.23</b>    | 4.85           | 4.86          | 5.08         | 5.08         | 5.08         | 5.08           | 4.85         | 4.85         | <b>0.23</b>  | <b>0.23</b>  |
| # mismatches per 100 kbp    | <b>3.57</b>    | 4.44           | 5.02           | 4.21           | 4.63          | 6.74         | 5.93         | 4.86         | 7.86           | 5.75         | 5.82         | 5.22         | 4.42         |
| # indels per 100 kbp        | 0.46           | 0.50           | 0.48           | 0.48           | 0.48          | 0.62         | 0.57         | <b>0.39</b>  | 0.57           | 0.50         | 0.64         | 0.44         | 0.48         |
| Largest alignment           | 326373         | 326195         | 326372         | 326373         | <b>326386</b> | 326277       | 326373       | 326372       | 326372         | 326372       | 326369       | 326373       | 326373       |
| Total aligned length        | <b>4368147</b> | 4367074        | 4367658        | 4367700        | 4365891       | 4365522      | 4366098      | 4367324      | 4367094        | 4366665      | 4366460      | 4366978      | 4367451      |
| NA50                        | 108254         | 108227         | <b>108381</b>  | 108254         | 108254        | 107774       | 107813       | 108228       | 107839         | 107839       | 107839       | 108254       | 108254       |
| NGA50                       | <b>97353</b>   | <b>97353</b>   | <b>97353</b>   | <b>97353</b>   | <b>97353</b>  | 97288        | <b>97353</b> | <b>97353</b> | <b>97353</b>   | <b>97353</b> | <b>97353</b> | <b>97353</b> | <b>97353</b> |
| NA75                        | <b>57964</b>   | 57170          | <b>57964</b>   | 57170          | 57147         | 57170        | <b>57964</b> | <b>57964</b> | <b>57964</b>   | 57170        | 57147        | <b>57964</b> | <b>57964</b> |
| NGA75                       | <b>46124</b>   | 45854          | <b>46124</b>   | 45889          | 45849         | 45889        | <b>46124</b> | 45940        | <b>46124</b>   | 45889        | 45889        | <b>46124</b> | <b>46124</b> |
| LA50                        | 13             | 13             | 13             | 13             | 13            | 13           | 13           | 13           | 13             | 13           | 13           | 13           | 13           |
| LGA50                       | 14             | 14             | 14             | 14             | 14            | 14           | 14           | 14           | 14             | 14           | 14           | 14           | 14           |
| LA75                        | <b>26</b>      | <b>26</b>      | <b>26</b>      | <b>26</b>      | <b>26</b>     | <b>26</b>    | <b>26</b>    | <b>26</b>    | <b>26</b>      | <b>26</b>    | <b>26</b>    | <b>26</b>    | <b>26</b>    |
| LGA75                       | 31             | 31             | 31             | 31             | 31            | 31           | 31           | 31           | 31             | 31           | 31           | 31           | 31           |

### 4.3.3 *E. coli* str. K-12 substr. MG1655

Table 24 contains the Quast report after assembling dataset *E. coli* str. K-12 substr. MG1655 with SPAdes .

Table 24: Assembly quality metrics for *E. coli* str. K-12 substr. MG1655

| Assembly                    | Uncorrected  | ACE            | BayesHammer  | BFC          | BLESS2            | Blue          | Fiona      | Karect         | Lighter      | Musket       | RACER          | SGA-EC       | Trowel     |
|-----------------------------|--------------|----------------|--------------|--------------|-------------------|---------------|------------|----------------|--------------|--------------|----------------|--------------|------------|
| # contigs (≥ 0 bp)          | 164          | 158            | 150          | 159          | 153               | 159           | 161        | 155            | 167          | 160          | 190            | 155          | 164        |
| # contigs (≥ 1000 bp)       | 81           | 78             | 79           | 81           | 83                | 78            | 82         | 80             | 79           | 81           | 82             | 82           | 82         |
| # contigs (≥ 5000 bp)       | 57           | 55             | 55           | 56           | 59                | 55            | 58         | 56             | 56           | 56           | 59             | 57           | 58         |
| # contigs (≥ 10000 bp)      | 53           | 51             | 51           | 52           | 55                | 51            | 54         | 52             | 52           | 51           | 55             | 53           | 54         |
| # contigs (≥ 25000 bp)      | 46           | 44             | 44           | 45           | 47                | 44            | 46         | 45             | 45           | 45           | 46             | 46           | 46         |
| # contigs (≥ 50000 bp)      | 32           | 30             | 30           | 31           | 33                | 30            | 32         | 31             | 31           | 31           | 30             | 32           | 32         |
| Total length (≥ 0 bp)       | 4574902      | 4572069        | 4571284      | 4573705      | 4571333           | 4571540       | 4573075    | 4573804        | 4574012      | 4573003      | <b>4576108</b> | 4572122      | 4573804    |
| Total length (≥ 1000 bp)    | 4552276      | 4550704        | 4550707      | 4552733      | <b>4553419</b>    | 4549150       | 4551715    | 4552703        | 4550476      | 4551502      | 4550150        | 4552196      | 4551826    |
| Total length (≥ 5000 bp)    | 4498097      | <b>4498467</b> | 4496562      | 4497074      | 4497995           | 4497320       | 4498289    | 4497588        | 4498037      | 4494003      | 4498297        | 4496914      | 4497625    |
| Total length (≥ 10000 bp)   | 4468403      | <b>4468853</b> | 4466868      | 4467460      | 4468381           | 4467706       | 4468675    | 4467894        | 4468343      | 4457829      | 4468683        | 4467220      | 4467931    |
| Total length (≥ 25000 bp)   | 4365479      | <b>4365929</b> | 4363941      | 4364536      | 4359852           | 4364932       | 4353033    | 4364945        | 4365419      | 4365575      | 4326060        | 4364293      | 4352292    |
| Total length (≥ 50000 bp)   | 3878734      | <b>3880534</b> | 3877098      | 3878218      | 3878960           | 3879694       | 3867798    | 3878598        | 3880218      | 3880177      | 3756292        | 3877450      | 3865520    |
| # contigs                   | 93           | 88             | 92           | 93           | 91                | 91            | 95         | 92             | 91           | 93           | 94             | 93           | 94         |
| Largest contig              | 264571       | 268093         | 285227       | 285527       | 264572            | <b>285529</b> | 264571     | 285527         | 264571       | 285527       | 264571         | 264571       | 264571     |
| Total length                | 4560939      | 4557864        | 4560016      | 4561050      | 4559088           | 4558416       | 4560905    | <b>4561354</b> | 4559497      | 4559819      | 4558813        | 4560187      | 4560489    |
| Reference length            | 4639675      | 4639675        | 4639675      | 4639675      | 4639675           | 4639675       | 4639675    | 4639675        | 4639675      | 4639675      | 4639675        | 4639675      | 4639675    |
| GC (%)                      | 50.74        | 50.75          | 50.74        | 50.74        | 50.75             | 50.75         | 50.74      | 50.75          | 50.74        | 50.74        | 50.74          | 50.74        | 50.74      |
| Reference GC (%)            | 50.79        | 50.79          | 50.79        | 50.79        | 50.79             | 50.79         | 50.79      | 50.79          | 50.79        | 50.79        | 50.79          | 50.79        | 50.79      |
| N50                         | 133309       | <b>133713</b>  | 133309       | 133309       | 126410            | 133309        | 133309     | 133309         | 133309       | 133309       | 133309         | 133189       | 133309     |
| NG50                        | 132876       | <b>133713</b>  | 133309       | 133088       | 126410            | 133309        | 132876     | 133058         | 133309       | 133088       | 132876         | 132876       | 132876     |
| N75                         | 64785        | 67335          | <b>67340</b> | 64785        | 64785             | 67335         | 64692      | 64785          | 67335        | 64785        | 62691          | 64399        | 64585      |
| NG75                        | 60768        | <b>64785</b>   | 64399        | 60768        | 60768             | <b>64785</b>  | 62691      | 60768          | <b>64785</b> | 62691        | 59669          | 60768        | 60768      |
| L50                         | 13           | <b>12</b>      | <b>12</b>    | <b>12</b>    | 14                | <b>12</b>     | 13         | <b>12</b>      | 13           | <b>12</b>    | 13             | 13           | 13         |
| LG50                        | 14           | <b>12</b>      | <b>12</b>    | 13           | 14                | <b>12</b>     | 14         | 13             | 13           | 13           | 14             | 14           | 14         |
| L75                         | 25           | <b>23</b>      | <b>23</b>    | 24           | 25                | <b>23</b>     | 25         | 24             | 24           | 24           | 25             | 25           | 25         |
| LG75                        | 26           | <b>24</b>      | <b>24</b>    | 25           | 26                | <b>24</b>     | 26         | 25             | 25           | 25           | 26             | 26           | 26         |
| # misassemblies             | 0            | 0              | 0            | 0            | 0                 | 0             | 0          | 0              | 0            | 0            | 0              | 0            | 0          |
| # misassembled contigs      | 0            | 0              | 0            | 0            | 0                 | 0             | 0          | 0              | 0            | 0            | 0              | 0            | 0          |
| Misassembled contigs length | 0            | 0              | 0            | 0            | 0                 | 0             | 0          | 0              | 0            | 0            | 0              | 0            | 0          |
| # local misassemblies       | 5            | 5              | 13           | 6            | 5                 | 6             | 6          | 5              | 8            | 6            | 7              | 11           | 8          |
| # unaligned mis. contigs    | 0            | 0              | 0            | 0            | 0                 | 0             | 0          | 0              | 0            | 0            | 0              | 0            | 0          |
| # unaligned contigs         | 4 + 0 part   | 2 + 0 part     | 4 + 0 part   | 4 + 0 part   | <b>0 + 0 part</b> | 4 + 0 part    | 5 + 0 part | 4 + 0 part     | 4 + 0 part   | 4 + 0 part   | 4 + 0 part     | 4 + 0 part   | 4 + 0 part |
| Unaligned length            | 2946         | 1443           | 2947         | 2946         | <b>0</b>          | 2946          | 3819       | 2946           | 2946         | 2946         | 2946           | 2946         | 2946       |
| Genome fraction (%)         | 98.203       | 98.170         | 98.188       | 98.207       | <b>98.219</b>     | 98.159        | 98.144     | 98.210         | 98.171       | 98.180       | 98.153         | 98.187       | 98.154     |
| Duplication ratio           | <b>1.000</b> | <b>1.000</b>   | <b>1.000</b> | <b>1.000</b> | <b>1.000</b>      | <b>1.000</b>  | 1.001      | <b>1.000</b>   | <b>1.000</b> | <b>1.000</b> | <b>1.000</b>   | <b>1.000</b> | 1.001      |
| # N's per 100 kbp           | 0.00         | 0.00           | 0.00         | 0.00         | 0.00              | 0.00          | 0.00       | 0.00           | 0.00         | 0.00         | 0.00           | 0.00         | 0.00       |
| # mismatches per 100 kbp    | <b>2.28</b>  | 3.10           | 3.60         | 3.34         | 3.25              | 3.71          | 3.91       | 3.07           | 3.23         | 3.84         | 3.40           | 2.68         | 2.68       |
| # indels per 100 kbp        | 0.50         | 0.44           | 0.55         | 0.46         | <b>0.42</b>       | 0.53          | 0.51       | 0.50           | 0.50         | 0.50         | 0.44           | 0.55         | 0.53       |
| Largest alignment           | 264571       | 268093         | 285227       | 285527       | 264572            | <b>285529</b> | 264571     | 285527         | 264571       | 285527       | 264571         | 264571       | 264571     |
| Total aligned length        | 4557359      | 4555713        | 4556641      | 4557578      | <b>4558342</b>    | 4555134       | 4554498    | 4557803        | 4555851      | 4556239      | 4555066        | 4556637      | 4555113    |
| NA50                        | 133309       | <b>133713</b>  | 133309       | 133309       | 126372            | 133309        | 133309     | 133309         | 133309       | 133309       | 133309         | 133189       | 133309     |
| NGA50                       | 132876       | <b>133713</b>  | 133309       | 133088       | 126372            | 133309        | 132876     | 133058         | 133309       | 133088       | 132876         | 132876       | 132876     |
| NA75                        | 64785        | 67335          | <b>67340</b> | 64785        | 64785             | 67335         | 64692      | 64785          | 67335        | 64785        | 62691          | 64399        | 64585      |
| NGA75                       | 60768        | <b>64785</b>   | 64399        | 60768        | 60768             | <b>64785</b>  | 62691      | 60768          | <b>64785</b> | 62691        | 59669          | 60768        | 60768      |
| LA50                        | 13           | <b>12</b>      | <b>12</b>    | <b>12</b>    | 14                | <b>12</b>     | 13         | <b>12</b>      | 13           | <b>12</b>    | 13             | 13           | 13         |
| LGA50                       | 14           | <b>12</b>      | <b>12</b>    | 13           | 14                | <b>12</b>     | 14         | 13             | 13           | 13           | 14             | 14           | 14         |
| LA75                        | 25           | <b>23</b>      | <b>23</b>    | 24           | 25                | <b>23</b>     | 25         | 24             | 24           | 24           | 25             | 25           | 25         |
| LGA75                       | 26           | <b>24</b>      | <b>24</b>    | 25           | 26                | <b>24</b>     | 26         | 25             | 25           | 25           | 26             | 26           | 26         |



### 4.3.4 *S. enterica*

Table 25 contains the Quast report after assembling dataset *S. enterica* with SPAdes .

Table 25: Assembly quality metrics for *S. enterica*

| Assembly                    | Uncorrected    | ACE            | BayesHammer       | BFC            | BLESS2         | Blue       | Fiona          | Karect         | Lighter        | Musket         | RACER          | SGA-EC         | Trowel         |             |
|-----------------------------|----------------|----------------|-------------------|----------------|----------------|------------|----------------|----------------|----------------|----------------|----------------|----------------|----------------|-------------|
| # contigs (≥ 0 bp)          | 164            | 68             | 74                | 115            | 85             | 104        | 88             | 89             | 91             | 96             | 120            | 136            | 124            |             |
| # contigs (≥ 1000 bp)       | 26             | 25             | 26                | 26             | 28             | 28         | 24             | 24             | 25             | 25             | 27             | 26             | 26             |             |
| # contigs (≥ 5000 bp)       | 20             | 17             | 19                | 19             | 21             | 19         | 19             | 18             | 19             | 19             | 21             | 19             | 19             |             |
| # contigs (≥ 10000 bp)      | 19             | 16             | 18                | 18             | 20             | 18         | 18             | 17             | 18             | 18             | 20             | 18             | 18             |             |
| # contigs (≥ 25000 bp)      | 18             | 15             | 17                | 17             | 19             | 17         | 17             | 16             | 17             | 17             | 19             | 17             | 17             |             |
| # contigs (≥ 50000 bp)      | 15             | 13             | 14                | 14             | 15             | 14         | 14             | 14             | 14             | 14             | 15             | 14             | 14             |             |
| Total length (≥ 0 bp)       | <b>4832029</b> | 4793717        | 4796241           | 4814811        | 4799092        | 4806157    | 4800907        | 4802582        | 4804245        | 4805547        | 4811040        | 4823822        | 4818253        |             |
| Total length (≥ 1000 bp)    | 4777575        | <b>4781314</b> | 4779647           | 4780180        | 4779682        | 4780281    | 4777060        | 4778776        | 4778844        | 4778551        | 4777452        | 4780362        | 4779898        |             |
| Total length (≥ 5000 bp)    | 4760565        | <b>4762438</b> | 4761734           | 4761892        | 4761770        | 4760166    | 4761628        | 4762066        | 4761834        | 4761767        | 4760713        | 4762074        | 4761833        |             |
| Total length (≥ 10000 bp)   | 4754365        | <b>4756238</b> | 4755534           | 4755692        | 4755570        | 4753966    | 4755428        | 4755866        | 4755634        | 4755567        | 4754513        | 4755874        | 4755633        |             |
| Total length (≥ 25000 bp)   | 4744007        | <b>4745880</b> | 4745176           | 4745334        | 4745212        | 4743653    | 4745070        | 4745508        | 4745276        | 4745209        | 4744155        | 4745516        | 4745275        |             |
| Total length (≥ 50000 bp)   | 4639979        | <b>4687841</b> | 4641148           | 4641306        | 4610505        | 4639921    | 4641042        | 4687469        | 4641248        | 4641181        | 4609483        | 4641488        | 4641247        |             |
| # contigs                   | 39             | 30             | 33                | 38             | 38             | 36         | 36             | 34             | 37             | 35             | 40             | 36             | 37             |             |
| Largest contig              | <b>1022731</b> | <b>1022731</b> | <b>1022731</b>    | <b>1022731</b> | <b>1022731</b> | 1022686    | <b>1022731</b> | <b>1022731</b> | <b>1022731</b> | <b>1022731</b> | <b>1022731</b> | <b>1022731</b> | <b>1022731</b> |             |
| Total length                | 4787310        | 4785068        | 4785034           | <b>4788472</b> | 4786552        | 4785774    | 4786046        | 4786049        | 4787682        | 4785715        | 4787246        | 4787493        | 4787748        |             |
| Reference length            | 4888768        | 4888768        | 4888768           | 4888768        | 4888768        | 4888768    | 4888768        | 4888768        | 4888768        | 4888768        | 4888768        | 4888768        | 4888768        |             |
| GC (%)                      | 52.14          | 52.14          | 52.14             | 52.14          | 52.14          | 52.14      | 52.14          | 52.14          | 52.14          | 52.14          | 52.14          | 52.14          | 52.14          |             |
| Reference GC (%)            | 52.09          | 52.09          | 52.09             | 52.09          | 52.09          | 52.09      | 52.09          | 52.09          | 52.09          | 52.09          | 52.09          | 52.09          | 52.09          |             |
| N50                         | 412097         | <b>725282</b>  | 723537            | 723537         | 381864         | 723550     | 723537         | <b>725282</b>  | 723537         | 723537         | 381603         | 723537         | 723537         |             |
| NG50                        | 412097         | <b>725282</b>  | 723537            | 723537         | 381864         | 723550     | 723537         | <b>725282</b>  | 723537         | 723537         | 381603         | 723537         | 723537         |             |
| N75                         | 235664         | <b>298653</b>  | 235664            | 235664         | 231409         | 235230     | 235664         | <b>235664</b>  | 235664         | 235664         | 231409         | 235664         | 235664         |             |
| NG75                        | 231409         | <b>298653</b>  | 235664            | 235664         | 231409         | 235230     | 235664         | <b>235664</b>  | 235664         | 235664         | 231409         | 235664         | 235664         |             |
| L50                         | 4              | 3              | 3                 | 3              | 4              | 3          | 3              | 3              | 3              | 3              | 3              | 4              | 3              |             |
| LG50                        | 4              | 3              | 3                 | 3              | 4              | 3          | 3              | 3              | 3              | 3              | 3              | 4              | 3              |             |
| L75                         | 7              | 6              | 7                 | 7              | 8              | 7          | 7              | 7              | 7              | 7              | 7              | 8              | 7              |             |
| LG75                        | 8              | 6              | 7                 | 7              | 8              | 7          | 7              | 7              | 7              | 7              | 7              | 8              | 7              |             |
| # misassemblies             | <b>12</b>      | 14             | 14                | 14             | 13             | 14         | 14             | 14             | 14             | 14             | <b>12</b>      | 14             | 14             |             |
| # misassembled contigs      | 8              | 7              | 7                 | 7              | 8              | 7          | 7              | 7              | 7              | 7              | 8              | 7              | 7              |             |
| Misassembled contigs length | 3676571        | 3960170        | 3677740           | 3677898        | 3647205        | 3677455    | 3677707        | 3724134        | 3677839        | 3677773        | <b>3646075</b> | 3678080        | 3677839        |             |
| # local misassemblies       | 5              | 5              | 6                 | 5              | 6              | 6          | 5              | 5              | 5              | 5              | 5              | 5              | 5              |             |
| # unaligned mis. contigs    | 0              | 0              | 0                 | 0              | 0              | 0          | 0              | 0              | 0              | 0              | 0              | 0              | 0              |             |
| # unaligned contigs         | 8 + 4 part     | 5 + 5 part     | <b>5 + 4 part</b> | 10 + 4 part    | 8 + 4 part     | 8 + 4 part | 8 + 4 part     | 8 + 4 part     | 8 + 4 part     | 9 + 4 part     | 7 + 4 part     | 9 + 4 part     | 8 + 4 part     | 10 + 4 part |
| Unaligned length            | 65378          | 63645          | <b>63216</b>      | 66496          | 64619          | 65150      | 64560          | 64446          | 66064          | 63864          | 65748          | 65335          | 66733          |             |
| Genome fraction (%)         | 96.545         | 96.552         | 96.557            | 96.557         | 96.551         | 96.535     | 96.551         | 96.557         | 96.553         | 96.558         | 96.545         | <b>96.560</b>  | 96.540         |             |
| Duplication ratio           | 1.000          | 1.000          | 1.000             | 1.000          | 1.000          | 1.000      | 1.000          | 1.000          | 1.000          | 1.000          | 1.000          | 1.000          | 1.000          |             |
| # N's per 100 kbp           | 0.00           | 0.00           | 0.00              | 0.00           | 0.00           | 0.00       | 0.00           | 0.00           | 0.00           | 0.00           | 0.00           | 0.00           | 0.00           |             |
| # mismatches per 100 kbp    | 7.10           | 7.61           | 7.10              | <b>6.91</b>    | 7.08           | 8.14       | 7.80           | 7.73           | 7.46           | 7.01           | 7.08           | 7.33           | 6.99           |             |
| # indels per 100 kbp        | 0.64           | 0.64           | 0.61              | <b>0.38</b>    | 0.61           | 0.68       | 0.74           | 0.64           | 0.66           | 0.64           | 0.61           | 0.42           | 0.61           |             |
| Largest alignment           | 453219         | 453219         | 453219            | 453219         | 453219         | 453219     | 453219         | 453219         | 453219         | 453219         | 453219         | 453219         | 453219         |             |
| Total aligned length        | 4721647        | 4721417        | 4721818           | 4721929        | 4721928        | 4720624    | 4721473        | 4721590        | 4721605        | 4721851        | 4721249        | <b>4722158</b> | 4721015        |             |
| NA50                        | 231409         | <b>269985</b>  | 231409            | 231409         | 231409         | 231409     | 231409         | 231409         | 231409         | 231409         | 231409         | 231409         | 231409         |             |
| NGA50                       | 231409         | 231409         | 231409            | 231409         | 231409         | 231409     | 231409         | 231409         | 231409         | 231409         | 231409         | 231409         | 231409         |             |
| NA75                        | 140342         | <b>161737</b>  | 140342            | 140342         | 140342         | 140342     | 140342         | 140342         | 140342         | 140342         | 140342         | 140342         | 140342         |             |
| NGA75                       | 133741         | <b>161737</b>  | 133741            | 133741         | 133741         | 133930     | 133741         | 161730         | 133741         | 133741         | 133741         | 133741         | 133741         |             |
| LA50                        | 8              | 7              | 8                 | 8              | 8              | 8          | 8              | 8              | 8              | 8              | 8              | 8              | 8              |             |
| LGA50                       | 8              | 8              | 8                 | 8              | 8              | 8          | 8              | 8              | 8              | 8              | 8              | 8              | 8              |             |
| LA75                        | 14             | 14             | 14                | 14             | 14             | 14         | 14             | 14             | 14             | 14             | 14             | 14             | 14             |             |
| LGA75                       | 15             | <b>14</b>      | 15                | 15             | 15             | 15         | 15             | <b>14</b>      | 15             | 15             | 15             | 15             | 15             |             |

### 4.3.5 *P. aeruginosa*

Table 26 contains the Quast report after assembling dataset *P. aeruginosa* with SPAdes .

Table 26: Assembly quality metrics for *P. aeruginosa*

| Assembly                    | Uncorrected    | ACE               | BayesHammer    | BFC           | BLESS2            | Blue           | Fiona         | Karect        | Lighter      | Musket       | RACER         | SGA-EC        | Trowel        |
|-----------------------------|----------------|-------------------|----------------|---------------|-------------------|----------------|---------------|---------------|--------------|--------------|---------------|---------------|---------------|
| # contigs (≥ 0 bp)          | 106            | 124               | 110            | 122           | 115               | 137            | 117           | 119           | 113          | 122          | 134           | 107           | 113           |
| # contigs (≥ 1000 bp)       | 51             | 54                | 51             | 53            | 55                | 52             | 52            | 52            | 53           | 53           | 54            | 51            | 51            |
| # contigs (≥ 5000 bp)       | 40             | 45                | 42             | 42            | 44                | 44             | 43            | 43            | 44           | 44           | 45            | 41            | 41            |
| # contigs (≥ 10000 bp)      | 34             | 38                | 35             | 36            | 38                | 37             | 36            | 36            | 37           | 37           | 38            | 35            | 35            |
| # contigs (≥ 25000 bp)      | 33             | 37                | 34             | 35            | 37                | 35             | 35            | 35            | 36           | 36           | 35            | 34            | 34            |
| # contigs (≥ 50000 bp)      | 26             | 29                | 27             | 27            | 29                | 27             | 27            | 27            | 28           | 28           | 27            | 27            | 27            |
| Total length (≥ 0 bp)       | 6230021        | 6230354           | 6230652        | 6230542       | 6228474           | <b>6232837</b> | 6230803       | 6230974       | 6230430      | 6231373      | 6231836       | 6229898       | 6230416       |
| Total length (≥ 1000 bp)    | 6216016        | 6215931           | <b>6217165</b> | 6214679       | 6214823           | 6214235        | 6215260       | 6215595       | 6215793      | 6215930      | 6215641       | 6215415       | 6215526       |
| Total length (≥ 5000 bp)    | 6197160        | 6202121           | <b>6203355</b> | 6195823       | 6195967           | 6201464        | 6201450       | 6201785       | 6201983      | 6202120      | 6201831       | 6197595       | 6197706       |
| Total length (≥ 10000 bp)   | 6160776        | 6160178           | <b>6161412</b> | 6159439       | 6159583           | 6159614        | 6159507       | 6159896       | 6160040      | 6160177      | 6159888       | 6161211       | 6161322       |
| Total length (≥ 25000 bp)   | 6136845        | 6136247           | <b>6137481</b> | 6135508       | 6135652           | 6122306        | 6135576       | 6135965       | 6136109      | 6136246      | 6096890       | 6137280       | 6137391       |
| Total length (≥ 50000 bp)   | <b>5871704</b> | 5831636           | 5862721        | 5831381       | 5831325           | 5818247        | 5831278       | 5831642       | 5831786      | 5831635      | 5796958       | 5862520       | 5862631       |
| # contigs                   | 59             | 60                | 58             | 61            | 62                | 61             | 59            | 60            | 61           | 60           | 62            | 59            | 59            |
| Largest contig              | 582545         | 582545            | 582545         | 582545        | 582545            | 582232         | 582232        | 582747        | 582545       | 582545       | <b>742310</b> | 582545        | 582545        |
| Total length                | 6221236        | 6220118           | <b>6221612</b> | 6219899       | 6219517           | 6220757        | 6220286       | 6220815       | 6221013      | 6220643      | 6220861       | 6220851       | 6220962       |
| Reference length            | 6264404        | 6264404           | 6264404        | 6264404       | 6264404           | 6264404        | 6264404       | 6264404       | 6264404      | 6264404      | 6264404       | 6264404       | 6264404       |
| GC (%)                      | 66.58          | 66.58             | 66.58          | 66.58         | 66.58             | 66.58          | 66.58         | 66.58         | 66.58        | 66.58        | 66.58         | 66.58         | 66.58         |
| Reference GC (%)            | 66.56          | 66.56             | 66.56          | 66.56         | 66.56             | 66.56          | 66.56         | 66.56         | 66.56        | 66.56        | 66.56         | 66.56         | 66.56         |
| N50                         | <b>289353</b>  | 264881            | <b>289353</b>  | <b>289353</b> | 264881            | 289314         | <b>289353</b> | <b>289353</b> | 264881       | 264881       | 264881        | <b>289353</b> | <b>289353</b> |
| NG50                        | <b>289353</b>  | 264881            | <b>289353</b>  | <b>289353</b> | 264881            | 289314         | <b>289353</b> | <b>289353</b> | 264881       | 264881       | 264881        | <b>289353</b> | <b>289353</b> |
| N75                         | <b>210881</b>  | 165623            | 165623         | 165623        | 119649            | 165623         | 165623        | 165623        | 165623       | 165623       | 165623        | 165623        | 165623        |
| NG75                        | <b>210881</b>  | 165623            | 165623         | 165623        | 119649            | 165623         | 165623        | 165623        | 165623       | 165623       | 165623        | 165623        | 165623        |
| L50                         | 7              | 8                 | 7              | 7             | 8                 | 7              | 7             | 7             | 8            | 8            | 7             | 7             | 7             |
| LG50                        | 7              | 8                 | 7              | 7             | 8                 | 7              | 7             | 7             | 8            | 8            | 7             | 7             | 7             |
| L75                         | 14             | 15                | 14             | 14            | 15                | 14             | 14            | 14            | 15           | 15           | 14            | 14            | 14            |
| LG75                        | 14             | 15                | 14             | 14            | 15                | 14             | 14            | 14            | 15           | 15           | 14            | 14            | 14            |
| # misassemblies             | 3              | 3                 | 3              | 3             | 3                 | 3              | 3             | 3             | 3            | 3            | 4             | 3             | 3             |
| # misassembled contigs      | 3              | 3                 | 3              | 3             | 3                 | 3              | 3             | 3             | 3            | 3            | 3             | 3             | 3             |
| Misassembled contigs length | 565341         | 565352            | 565341         | 565341        | 565459            | <b>565086</b>  | 565352        | 565341        | 565341       | 565352       | 920163        | 565341        | 565341        |
| # local misassemblies       | 5              | 7                 | 6              | 4             | 7                 | 6              | 4             | 5             | 4            | 4            | 6             | 7             | 9             |
| # unaligned mis. contigs    | 0              | 0                 | 0              | 0             | 0                 | 0              | 0             | 0             | 0            | 0            | 0             | 0             | 0             |
| # unaligned contigs         | 1 + 2 part     | <b>0 + 2 part</b> | 1 + 3 part     | 1 + 2 part    | <b>0 + 2 part</b> | 1 + 2 part     | 1 + 2 part    | 1 + 2 part    | 1 + 2 part   | 1 + 2 part   | 1 + 2 part    | 1 + 3 part    | 1 + 3 part    |
| Unaligned length            | 11429          | <b>10903</b>      | 12478          | 11429         | <b>10903</b>      | 11429          | 11429         | 11429         | 11429        | 11429        | 11429         | 12478         | 12478         |
| Genome fraction (%)         | <b>99.088</b>  | 99.074            | 99.070         | 99.072        | 99.068            | 99.075         | 99.078        | 99.080        | 99.083       | 99.079       | 99.079        | 99.061        | 99.057        |
| Duplication ratio           | <b>1.000</b>   | <b>1.000</b>      | <b>1.000</b>   | <b>1.000</b>  | <b>1.000</b>      | <b>1.000</b>   | <b>1.000</b>  | <b>1.000</b>  | <b>1.000</b> | <b>1.000</b> | <b>1.000</b>  | <b>1.000</b>  | 1.001         |
| # N's per 100 kbp           | 18.39          | 18.55             | 17.95          | 17.80         | 18.28             | 19.74          | 17.80         | 18.71         | 18.55        | 18.55        | 17.79         | <b>17.49</b>  | 17.96         |
| # mismatches per 100 kbp    | <b>2.84</b>    | 3.35              | 4.03           | 3.06          | 3.56              | 3.93           | 3.16          | 3.35          | 3.09         | 3.16         | 3.58          | 3.72          | 4.03          |
| # indels per 100 kbp        | <b>0.84</b>    | 0.85              | 0.93           | 0.87          | 0.87              | 1.02           | 0.85          | <b>0.84</b>   | 0.87         | 0.85         | 0.90          | 0.92          | 0.98          |
| Largest alignment           | 582545         | 582545            | 582545         | 582545        | 582545            | 582232         | 582232        | <b>582018</b> | 582545       | 582545       | 582545        | 582545        | 582545        |
| Total aligned length        | <b>6209300</b> | 6208656           | 6208592        | 6208168       | 6208014           | 6209026        | 6208555       | 6208955       | 6209077      | 6208733      | 6208835       | 6207866       | 6208060       |
| NA50                        | <b>289353</b>  | 264881            | 264881         | 264881        | 264881            | 264881         | 264881        | 264881        | 264881       | 264881       | 264881        | 264881        | 264881        |
| NGA50                       | <b>289353</b>  | 264881            | 264881         | 264881        | 264881            | 264881         | 264881        | 264881        | 264881       | 264881       | 264881        | 264881        | 264881        |
| NA75                        | <b>210881</b>  | 165623            | 165623         | 165623        | 119649            | 165623         | 165623        | 165623        | 165623       | 165623       | 165623        | 165623        | 165623        |
| NGA75                       | <b>210881</b>  | 119649            | 165623         | 165623        | 119649            | 165623         | 165623        | 165623        | 165623       | 165623       | 165623        | 165623        | 165623        |
| LA50                        | 7              | 8                 | 8              | 8             | 8                 | 8              | 8             | 8             | 8            | 8            | 8             | 8             | 8             |
| LGA50                       | 7              | 8                 | 8              | 8             | 8                 | 8              | 8             | 8             | 8            | 8            | 8             | 8             | 8             |
| LA75                        | 14             | 15                | 14             | 14            | 15                | 14             | 14            | 14            | 15           | 15           | 15            | 14            | 14            |
| LGA75                       | 14             | 16                | 14             | 14            | 15                | 14             | 14            | 14            | 15           | 15           | 15            | 14            | 14            |

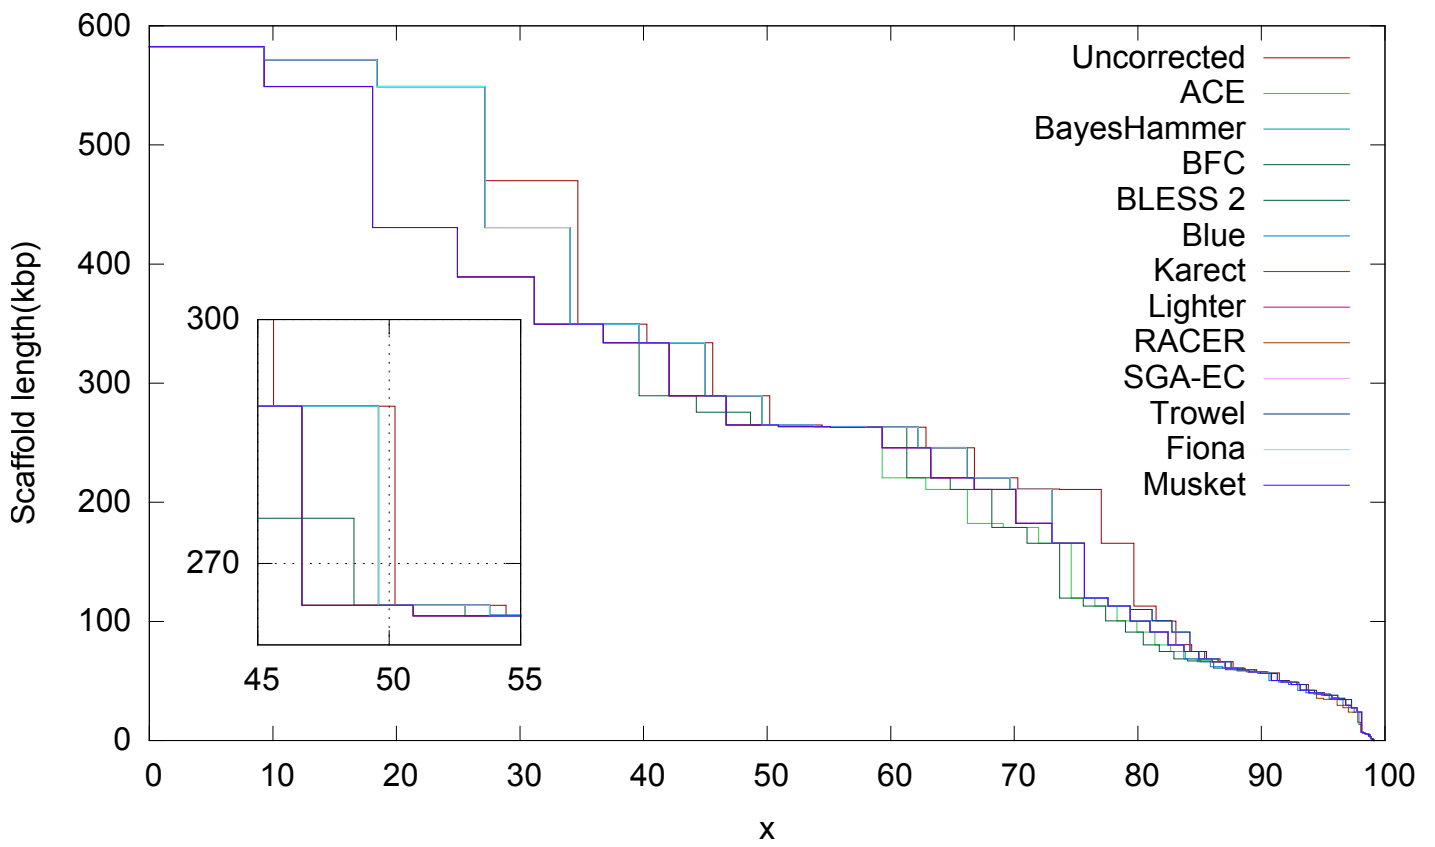

Figure 1: SPAdes assembly results for *P. aeruginosa* for both uncorrected and corrected data. Scaffolds with length  $NGAx$  or larger produce  $x\%$  of the genome.

### 4.3.6 *H. sapiens* Chr. 21

Table 27 contains the Quast report after assembling dataset *H. sapiens* Chr. 21 with SPAdes .

Table 27: Assembly quality metrics for *H. sapiens* Chr. 21

| Assembly                    | Uncorrected  | ACE          | BayesHammer  | BFC          | BLESS2       | Blue                | Fiona         | Karect          | Lighter      | Musket         | RACER        | SGA-EC       | Trowel       |
|-----------------------------|--------------|--------------|--------------|--------------|--------------|---------------------|---------------|-----------------|--------------|----------------|--------------|--------------|--------------|
| # contigs (≥ 0 bp)          | 11658        | 13066        | 10876        | 11247        | 13635        | 15666               | 11618         | 12646           | 12001        | 12350          | 13682        | 11803        | 13586        |
| # contigs (≥ 1000 bp)       | 3661         | 3488         | 3376         | 3420         | 3925         | 3935                | 3368          | 3279            | 3425         | 3416           | 3879         | 3408         | 3969         |
| # contigs (≥ 5000 bp)       | 1987         | 1961         | 1925         | 1911         | 2034         | 2085                | 1943          | 1897            | 1917         | 1929           | 2026         | 1919         | 2048         |
| # contigs (≥ 10000 bp)      | 1145         | 1135         | 1119         | 1140         | 1098         | 1119                | 1142          | 1150            | 1137         | 1136           | 1090         | 1149         | 1103         |
| # contigs (≥ 25000 bp)      | 246          | 250          | 279          | 282          | 216          | 210                 | 271           | 295             | 279          | 274            | 215          | 270          | 214          |
| # contigs (≥ 50000 bp)      | 24           | 29           | 27           | 27           | 12           | 20                  | 32            | 32              | 23           | 36             | 17           | 30           | 17           |
| Total length (≥ 0 bp)       | 34305614     | 34380522     | 34123100     | 34286645     | 34220998     | <b>34449556</b>     | 34242236      | 34445755        | 34374980     | 34350021       | 34383404     | 34381972     | 34389916     |
| Total length (≥ 1000 bp)    | 32945791     | 32944930     | 32860903     | 32985264     | 32700258     | 32769213            | 32955487      | <b>33047117</b> | 32997396     | 32974244       | 32838152     | 33005502     | 32846237     |
| Total length (≥ 5000 bp)    | 28720164     | 29021061     | 29168621     | 29179374     | 27803086     | 27971993            | 29261315      | <b>29545706</b> | 29162965     | 29238235       | 27997267     | 29201336     | 27915791     |
| Total length (≥ 10000 bp)   | 22672318     | 23065855     | 23340510     | 23624964     | 21088444     | 21094246            | 23475955      | <b>24143915</b> | 23553674     | 23512065       | 21260122     | 23687963     | 21057378     |
| Total length (≥ 25000 bp)   | 8707938      | 9282473      | 10143177     | 10229508     | 7489603      | 7406913             | 10060749      | <b>10705450</b> | 10021930     | 10100507       | 7680611      | 9985753      | 7449787      |
| Total length (≥ 50000 bp)   | 1423296      | 1891297      | 1724169      | 1679438      | 781510       | 1218193             | 2073928       | 2036281         | 1482391      | <b>2208760</b> | 1047851      | 1898371      | 1018260      |
| # contigs                   | 4303         | 4082         | 3948         | 4032         | 4584         | 4635                | 3949          | 3838            | 4038         | 3997           | 4551         | 4008         | 4702         |
| Largest contig              | 74497        | 103923       | 82977        | 109258       | 82937        | 90065               | <b>136866</b> | 111589          | 90223        | 105061         | 85668        | 112665       | 85021        |
| Total length                | 33409153     | 33370188     | 33274939     | 33424565     | 33177053     | 33276648            | 33371010      | <b>33445850</b> | 33437566     | 33390351       | 33323920     | 33437887     | 33379800     |
| Reference length            | 46709983     | 46709983     | 46709983     | 46709983     | 46709983     | 46709983            | 46709983      | 46709983        | 46709983     | 46709983       | 46709983     | 46709983     | 46709983     |
| GC (%)                      | 40.79        | 40.82        | 40.76        | 40.80        | 40.75        | 40.79               | 40.81         | 40.82           | 40.81        | 40.81          | 40.79        | 40.81        | 40.78        |
| Reference GC (%)            | 42.22        | 42.22        | 42.22        | 42.22        | 42.22        | 42.22               | 42.22         | 42.22           | 42.22        | 42.22          | 42.22        | 42.22        | 42.22        |
| N50                         | 15229        | 15787        | 16485        | 16484        | 13678        | 13214               | 15905         | <b>17170</b>    | 16666        | 16419          | 13876        | 16495        | 13493        |
| NG50                        | 9391         | 9717         | 9988         | 10203        | 8262         | 8194                | 10128         | <b>10819</b>    | 10189        | 10172          | 8448         | 10303        | 8291         |
| N75                         | 7932         | 8326         | 8555         | 8647         | 7180         | 7076                | 8718          | <b>9161</b>     | 8521         | 8622           | 7219         | 8673         | 7193         |
| L50                         | 662          | 629          | 600          | 604          | 716          | 735                 | 608           | <b>588</b>      | 610          | 606            | 702          | 607          | 729          |
| LG50                        | 1216         | 1165         | 1121         | 1114         | 1347         | 1369                | 1130          | <b>1074</b>     | 1118         | 1121           | 1318         | 1117         | 1355         |
| L75                         | 1412         | 1351         | 1293         | 1296         | 1546         | 1579                | 1309          | <b>1249</b>     | 1302         | 1301           | 1529         | 1299         | 1573         |
| # misassemblies             | 205          | 203          | 224          | 202          | 191          | 168                 | 203           | <b>119</b>      | 179          | 200            | 358          | 207          | 222          |
| # misassembled contigs      | 196          | 188          | 207          | 186          | 183          | 159                 | 179           | <b>112</b>      | 161          | 184            | 331          | 196          | 208          |
| Misassembled contigs length | 3187244      | 3357505      | 3896326      | 3645633      | 2616542      | 2508072             | 3576383       | <b>2217240</b>  | 3109131      | 3728907        | 5318815      | 3876193      | 3101965      |
| # local misassemblies       | 148          | 128          | 153          | 134          | <b>111</b>   | 121                 | 143           | 134             | 133          | 146            | 134          | 141          | 134          |
| # structural variations     | 1            | 0            | 1            | 1            | 0            | 1                   | 1             | 0               | 1            | 1              | 1            | 1            | 1            |
| # unaligned mis. contigs    | 2            | <b>0</b>     | 1            | 1            | <b>0</b>     | 1                   | <b>0</b>      | 1               | <b>0</b>     | <b>0</b>       | <b>0</b>     | 2            | <b>0</b>     |
| # unaligned contigs         | 90 + 17 part | 72 + 11 part | 84 + 16 part | 93 + 15 part | 58 + 17 part | <b>50 + 13 part</b> | 66 + 11 part  | 74 + 11 part    | 95 + 12 part | 70 + 14 part   | 73 + 14 part | 92 + 10 part | 94 + 18 part |
| Unaligned length            | 107345       | 80003        | 115175       | 108173       | 76973        | <b>67157</b>        | 79411         | 91569           | 108183       | 90024          | 98217        | 105816       | 111030       |
| Genome fraction (%)         | 70.891       | 70.884       | 70.744       | 70.953       | 70.540       | 70.699              | 70.936        | <b>71.080</b>   | 70.978       | 70.942         | 70.706       | 70.986       | 70.800       |
| Duplication ratio           | 1.006        | 1.005        | <b>1.003</b> | 1.005        | 1.005        | 1.006               | 1.005         | 1.005           | 1.005        | 1.005          | 1.006        | 1.005        | 1.006        |
| # N's per 100 kbp           | 12.56        | 13.76        | 11.38        | 12.28        | 28.84        | 14.08               | <b>8.36</b>   | 15.66           | 14.59        | 13.19          | 10.92        | 12.46        | 9.72         |
| # mismatches per 100 kbp    | 177.83       | 179.97       | 169.06       | 173.89       | 176.87       | 186.06              | 177.09        | <b>168.19</b>   | 175.09       | 176.42         | 188.03       | 174.83       | 183.62       |
| # indels per 100 kbp        | 37.28        | 37.81        | 37.16        | <b>36.80</b> | 37.01        | 37.70               | 38.14         | 36.96           | 37.49        | 37.43          | 38.00        | 37.48        | 37.17        |
| Largest alignment           | 74497        | 103923       | 82445        | 90912        | 81005        | 90065               | <b>136863</b> | 111527          | 90220        | 103129         | 85647        | 90220        | 85007        |
| Total aligned length        | 33233678     | 33218305     | 33132429     | 33254831     | 33047536     | 33140710            | 33236923      | <b>33302749</b> | 33270483     | 33245187       | 33141015     | 33274470     | 33199144     |
| NA50                        | 14406        | 15025        | 15545        | 15471        | 13158        | 12820               | 15154         | <b>16481</b>    | 15781        | 15462          | 12579        | 15379        | 12815        |
| NGA50                       | 8829         | 9190         | 9443         | 9578         | 7802         | 7754                | 9491          | <b>10302</b>    | 9618         | 9502           | 7603         | 9640         | 7863         |
| NA75                        | 7453         | 7800         | 8104         | 8018         | 6747         | 6733                | 8143          | <b>8723</b>     | 8075         | 8070           | 6562         | 8040         | 6837         |
| LA50                        | 694          | 664          | 636          | 640          | 740          | 763                 | 647           | <b>611</b>      | 643          | 644            | 772          | 645          | 761          |
| LGA50                       | 1280         | 1231         | 1188         | 1184         | 1404         | 1428                | 1198          | <b>1115</b>     | 1180         | 1191           | 1452         | 1188         | 1419         |
| LA75                        | 1490         | 1428         | 1371         | 1379         | 1614         | 1650                | 1388          | <b>1297</b>     | 1375         | 1384           | 1684         | 1384         | 1648         |

### 4.3.7 *C. elegans*

Table 28 contains the Quast report after assembling dataset *C. elegans* with SPAdes .

Table 28: Assembly quality metrics for *C. elegans*

| Assembly                    | Uncorrected      | ACE                    | BayesHammer     | BFC             | BLESS2          | Blue           | Fiona           | Karect         | Lighter         | Musket         | RACER           | SGA-EC         | Trowl            |
|-----------------------------|------------------|------------------------|-----------------|-----------------|-----------------|----------------|-----------------|----------------|-----------------|----------------|-----------------|----------------|------------------|
| # contigs (≥ 0 bp)          | 64272            | 81082                  | 62466           | 64735           | 87989           | 67408          | 70638           | 65792          | 67043           | 70931          | 78836           | 64022          | 65391            |
| # contigs (≥ 1000 bp)       | 19715            | 26128                  | 19230           | 19773           | 27860           | 19976          | 21281           | 19728          | 20822           | 22405          | 24680           | 19671          | 19746            |
| # contigs (≥ 5000 bp)       | 6322             | 5237                   | 6324            | 6345            | 4809            | 6255           | 6277            | 6345           | 6432            | 6157           | 5674            | 6320           | 6322             |
| # contigs (≥ 10000 bp)      | 2427             | 1174                   | 2456            | 2405            | 972             | 2373           | 2147            | 2428           | 2246            | 1919           | 1545            | 2418           | 2404             |
| # contigs (≥ 25000 bp)      | 291              | 123                    | 319             | 298             | 73              | 302            | 241             | 308            | 251             | 201            | 152             | 294            | 291              |
| # contigs (≥ 50000 bp)      | 69               | 34                     | 73              | 65              | 8               | 64             | 54              | 64             | 58              | 53             | 39              | 68             | 66               |
| Total length (≥ 0 bp)       | 116531376        | 112665206              | 115842055       | 116541087       | 112459609       | 116159435      | 115776939       | 116265023      | 115948004       | 115599759      | 114392779       | 116406566      | <b>116593128</b> |
| Total length (≥ 1000 bp)    | <b>104888717</b> | 96488385               | 104286506       | 104761637       | 93758025        | 104056252      | 102742327       | 104449183      | 103511220       | 102076721      | 98489212        | 104803286      | 104708953        |
| Total length (≥ 5000 bp)    | 7268217          | 47647948               | <b>73360701</b> | 72602210        | 40794116        | 71152597       | 67007401        | 72377260       | 69150530        | 63681095       | 54401186        | 72740724       | 72574356         |
| Total length (≥ 10000 bp)   | 45311588         | 20068019               | <b>46103656</b> | 44926759        | 14879662        | 43803433       | 38056990        | 44781786       | 39819043        | 34047844       | 26049004        | 45279671       | 45056640         |
| Total length (≥ 25000 bp)   | 13999398         | 5661850                | <b>14795023</b> | 14054191        | 2637052         | 13691065       | 10590733        | 13714349       | 11128377        | 9601227        | 6786678         | 14041231       | 14181993         |
| Total length (≥ 50000 bp)   | 6899697          | 2516113                | <b>6959909</b>  | 6455562         | 459382          | 6022022        | 4471501         | 5853071        | 4791869         | 4687814        | 3002620         | 6744537        | 6890533          |
| # contigs                   | 26846            | 37484                  | 26495           | 27029           | 40819           | 27393          | 29558           | 26932          | 28780           | 31318          | 35887           | 26896          | 26974            |
| Largest contig              | 240969           | 128379                 | 240394          | 240222          | 66400           | 240394         | 164676          | 238991         | 232377          | 240394         | 152332          | 263254         | <b>402380</b>    |
| Total length                | <b>109983290</b> | 104619147              | 109484481       | 109949860       | 103011932       | 109370494      | 108661357       | 109660335      | 109201095       | 108455777      | 106522260       | 109900955      | 109964382        |
| Reference length            | 100286070        | 100286070              | 100286070       | 100286070       | 100286070       | 100286070      | 100286070       | 100286070      | 100286070       | 100286070      | 100286070       | 100286070      | 100286070        |
| GC (%)                      | 38.47            | 38.28                  | 38.40           | 38.45           | 38.19           | 38.44          | 38.33           | 38.41          | 38.34           | 38.38          | 38.57           | 38.46          | 38.46            |
| Reference GC (%)            | 35.44            | 35.44                  | 35.44           | 35.44           | 35.44           | 35.44          | 35.44           | 35.44          | 35.44           | 35.44          | 35.44           | 35.44          | 35.44            |
| N50                         | 7948             | 4512                   | <b>8157</b>     | 7871            | 3931            | 7708           | 6873            | 7923           | 7154            | 6334           | 5139            | 7959           | 7913             |
| NG50                        | 8939             | 4738                   | <b>9140</b>     | 8876            | 4045            | 8667           | 7551            | 8861           | 7925            | 6946           | 5518            | 8926           | 8888             |
| N75                         | 3654             | 2270                   | <b>3736</b>     | 3636            | 2011            | 3538           | 3208            | 3633           | 3366            | 2957           | 2436            | 3661           | 3629             |
| NG75                        | 4633             | 2514                   | <b>4710</b>     | 4615            | 2142            | 4421           | 3949            | 4573           | 4191            | 3397           | 2846            | 4631           | 4602             |
| L50                         | 3515             | 6219                   | <b>3411</b>     | 3538            | 7235            | 3611           | 4119            | 3554           | 4000            | 4475           | 5450            | 3505           | 3526             |
| L75                         | 2939             | 5750                   | <b>2879</b>     | 2960            | 6894            | 3055           | 3538            | 2998           | 3408            | 3859           | 4864            | 2934           | 2945             |
| L95                         | 8614             | 14423                  | <b>8346</b>     | 8658            | 16402           | 8846           | 9889            | 8652           | 9540            | 10757          | 12969           | 8585           | 8648             |
| LG75                        | 6849             | 13062                  | <b>6706</b>     | 6890            | 15417           | 7121           | 8124            | 6940           | 7759            | 8881           | 11193           | 6835           | 6874             |
| # misassemblies             | 1377             | 4278                   | <b>1460</b>     | 1342            | 1654            | 1003           | 1345            | 1345           | 2025            | 2403           | 8293            | 1392           | 1377             |
| # misassembled contigs      | 1296             | 3858                   | 1371            | 1254            | 1593            | 1510           | 1890            | 1257           | 1874            | 1963           | 6560            | 1310           | 1297             |
| Misassembled contigs length | 9735210          | 17244516               | 10432258        | 9391106         | <b>5928792</b>  | 10781051       | 12282942        | 9392527        | 12972582        | 11134702       | 31623064        | 9855510        | 9569483          |
| # local misassemblies       | 309              | 326                    | 433             | 392             | <b>309</b>      | 412            | 473             | 414            | 394             | 425            | 346             | 409            | 401              |
| # unaligned mis. contigs    | <b>7</b>         | 21                     | 9               | 8               | 13              | 9              | 9               | <b>7</b>       | 9               | 12             | 20              | <b>7</b>       | 10               |
| # unaligned contigs         | 4743 + 91 part   | <b>4049 + 169 part</b> | 4899 + 88 part  | 4789 + 86 part  | 4465 + 88 part  | 4756 + 97 part | 4798 + 108 part | 4807 + 79 part | 4904 + 104 part | 4886 + 98 part | 4976 + 177 part | 4770 + 92 part | 4739 + 81 part   |
| Unaligned length            | 16953817         | 14482847               | 16700997        | 16905208        | <b>14030377</b> | 16726451       | 16200042        | 16687086       | 16399595        | 16371253       | 16133966        | 16937864       | 16931221         |
| Genome fraction (%)         | 92.273           | 87.960                 | <b>92.152</b>   | 92.152          | <b>92.298</b>   | 88.334         | 91.876          | 91.576         | 91.949          | 91.161         | 88.855          | 92.212         | 92.276           |
| Duplication ratio           | 1.005            | 1.022                  | <b>1.004</b>    | 1.005           | <b>1.004</b>    | 1.005          | 1.007           | 1.005          | 1.006           | 1.007          | 1.014           | 1.005          | 1.005            |
| # N's per 100 kbp           | 144.78           | <b>112.56</b>          | 148.00          | 144.96          | 115.15          | 148.93         | 144.91          | 144.51         | 144.71          | 143.32         | 136.35          | 146.95         | 146.14           |
| # mismatches per 100 kbp    | 33.27            | 117.20                 | <b>30.55</b>    | 33.15           | 37.24           | 39.77          | 87.49           | 33.57          | 80.67           | 177.01         | 155.25          | 33.51          | 33.23            |
| # indels per 100 kbp        | 7.22             | 19.86                  | <b>7.82</b>     | <b>7.17</b>     | 8.24            | 8.15           | 22.19           | 7.31           | 8.01            | 10.97          | 21.52           | 7.32           | 7.20             |
| Largest alignment           | 50836            | 27416                  | <b>64368</b>    | 50836           | 27155           | 50836          | 50837           | 64367          | 50836           | 41089          | 40668           | 50836          | 50836            |
| Total aligned length        | 92814637         | 88415367               | 92662358        | <b>92838725</b> | 88802236        | 92418941       | 92296639        | 92718109       | 92538398        | 91814436       | 89541690        | 92751467       | 92825410         |
| NA50                        | 5625             | 2979                   | <b>5795</b>     | 5605            | 2928            | 5432           | 4799            | 5623           | 5037            | 4404           | 2979            | 5640           | 5593             |
| NGA50                       | 6472             | 3158                   | <b>6576</b>     | 6437            | 3036            | 6183           | 5385            | 6431           | 5654            | 4952           | 3266            | 6483           | 6423             |
| NA75                        | 1878             | 1124                   | <b>1939</b>     | 1874            | 1210            | 1815           | 1658            | 1901           | 1721            | 1526           | 1037            | 1880           | 1872             |
| NGA75                       | 2805             | 1348                   | <b>2849</b>     | 2788            | 1338            | 2844           | 2541            | 2782           | 2488            | 2143           | 2799            | 2787           | 2787             |
| LA50                        | 5079             | 9487                   | <b>4925</b>     | 5093            | 9672            | 5224           | 5940            | 5055           | 5767            | 6448           | 9342            | 5061           | 5102             |
| LGA50                       | 4274             | 8780                   | <b>4181</b>     | 4288            | 9214            | 4438           | 5117            | 4280           | 4931            | 5572           | 8343            | 4265           | 4293             |
| LA75                        | 13282            | 23377                  | <b>12846</b>    | 13314           | 23124           | 13702          | 15293           | 13194          | 14769           | 16627          | 24133           | 13249          | 13343            |
| LGA75                       | 10140            | 20740                  | <b>9931</b>     | 10174           | 21516           | 10617          | 12131           | 10183          | 11563           | 13253          | 20188           | 10133          | 10193            |

### 4.3.8 *D. melanogaster*

Table 29 contains the Quast report after assembling dataset *D. melanogaster* with SPAdes .

Table 29: Assembly quality metrics for *D. melanogaster*

| Assembly                    | Uncorrected      | ACE             | BayesHammer     | BFC             | BLESS2                 | Blue            | Fiona            | Karect           | Lighter         | Musket          | RACER           | SGA-EC           | Trowel          |
|-----------------------------|------------------|-----------------|-----------------|-----------------|------------------------|-----------------|------------------|------------------|-----------------|-----------------|-----------------|------------------|-----------------|
| # contigs (≥ 0 bp)          | 74043            | 78599           | 69271           | 73234           | 76430                  | 74610           | 80861            | 74173            | 71394           | 80075           | 86186           | 70023            | 72210           |
| # contigs (≥ 1000 bp)       | 5483             | 6789            | 5454            | 5543            | 6771                   | 5503            | 5900             | 5431             | 5523            | 6199            | 9213            | 5480             | 5650            |
| # contigs (≥ 5000 bp)       | 2533             | 3751            | 2550            | 2593            | 3730                   | 2558            | 2731             | 2456             | 2640            | 2934            | 4623            | 2530             | 2643            |
| # contigs (≥ 10000 bp)      | 1383             | 3754            | 1922            | 1851            | 3750                   | 1915            | 2084             | 1844             | 1992            | 2212            | 3185            | 1907             | 2067            |
| # contigs (≥ 25000 bp)      | 1206             | 1442            | 1193            | 1211            | 1402                   | 1197            | 1271             | 1177             | 1229            | 1304            | 1412            | 1182             | 1235            |
| # contigs (≥ 50000 bp)      | 704              | 626             | 701             | 691             | 615                    | 679             | 711              | 700              | 711             | 700             | 498             | 687              | 692             |
| Total length (≥ 0 bp)       | 130030442        | 128478789       | 129365298       | 129911559       | 127133184              | 129521097       | <b>130605696</b> | 129982716        | 129327660       | 130215917       | 130591397       | 129618485        | 12965323        |
| Total length (≥ 1000 bp)    | 120972662        | 119245763       | 120687956       | 120958052       | 118182463              | 120423867       | 12085087         | <b>121024055</b> | 120546143       | 120456395       | 120303693       | 120666385        | 120866566       |
| Total length (≥ 5000 bp)    | <b>114719681</b> | 112180660       | 114535094       | 114657226       | 111207133              | 114290288       | 114138370        | 114718069        | 114398253       | 11324107        | 106812670       | 114690805        | 114379771       |
| Total length (≥ 10000 bp)   | <b>110478651</b> | 105018796       | 110093513       | 110109175       | 104211872              | 109698057       | 109534716        | 110408999        | 109753315       | 108438348       | 99585998        | 110279695        | 108415156       |
| Total length (≥ 25000 bp)   | 98656926         | 83966275        | 98283329        | 97985019        | 82967268               | 97987147        | 96415034         | <b>99512924</b>  | 97286836        | 93500996        | 70429725        | 98360112         | 97108585        |
| Total length (≥ 50000 bp)   | 80423462         | 54558355        | 80410300        | 79115237        | 54255186               | 78950991        | 75502000         | <b>81985069</b>  | 78612470        | 71818362        | 3819731         | 80250129         | 77361963        |
| # contigs                   | 8454             | 9707            | 8451            | 8575            | 9382                   | 8580            | 8924             | 8361             | 8514            | 9443            | 12816           | 8461             | 8613            |
| Largest contig              | 518444           | 344897          | 522527          | 518411          | 440228                 | 482029          | 433735           | 518285           | 502584          | 367481          | 243181          | 598856           | <b>686399</b>   |
| Total length                | 123060751        | 121275348       | 122787001       | 123078343       | 119991674              | 122588231       | 123008213        | <b>123082336</b> | 123638571       | 122729429       | 122836325       | 123059826        | 122954447       |
| Reference length            | 120381546        | 120381546       | 120381546       | 120381546       | 120381546              | 120381546       | 120381546        | 120381546        | 120381546       | 120381546       | 120381546       | 120381546        | 120381546       |
| GC (%)                      | 42.56            | 42.52           | 42.53           | 42.57           | 42.51                  | 42.58           | 42.58            | 42.57            | 42.55           | 42.59           | 42.58           | 42.57            | 42.57           |
| Reference GC (%)            | 42.42            | 42.42           | 42.42           | 42.42           | 42.42                  | 42.42           | 42.42            | 42.42            | 42.42           | 42.42           | 42.42           | 42.42            | 42.42           |
| N50                         | 83804            | 43877           | 84315           | 82203           | 43315                  | 83277           | 71630            | <b>88533</b>     | 79363           | 83114           | 31144           | 84694            | 77879           |
| NG50                        | 86505            | 44167           | 85854           | 84499           | 43084                  | 84749           | 73544            | <b>91730</b>     | 81203           | 65332           | 31761           | 87595            | 80342           |
| N75                         | 34576            | 19862           | 34016           | 32845           | 19401                  | 34311           | 30651            | <b>36690</b>     | 32157           | 26676           | 13867           | 34383            | 31539           |
| NG75                        | 37300            | 20342           | 36806           | 35722           | 19244                  | 36580           | 33263            | <b>39101</b>     | 34418           | 28621           | 11802           | 37283            | 34705           |
| L50                         | 411              | 756             | 408             | 413             | 739                    | 401             | 470              | <b>393</b>       | 516             | 397             | 1091            | 397              | 436             |
| L50                         | 395              | 746             | 394             | 396             | 743                    | 391             | 452              | <b>378</b>       | 420             | 497             | 1052            | 381              | 419             |
| L75                         | 990              | 1785            | 982             | 1015            | 1761                   | 990             | 1122             | <b>941</b>       | 1043            | 1248            | 2562            | 975              | 1061            |
| L75                         | 934              | 1752            | 932             | 956             | 1776                   | 944             | 1060             | <b>888</b>       | 991             | 1185            | 2433            | 919              | 1003            |
| # misassemblies             | 1100             | 1287            | 1133            | 1114            | 1304                   | 1201            | 1152             | <b>1098</b>      | 1152            | 1225            | 2236            | 1111             | 1163            |
| # misassembled contigs      | <b>846</b>       | 1063            | 861             | 856             | 1079                   | 915             | 907              | <b>850</b>       | 886             | 948             | 1751            | 847              | 889             |
| Misassembled contigs length | 53506639         | 40876670        | 55491362        | 5372382         | <b>40614325</b>        | 5704407         | 51435560         | 54512303         | 55267465        | 50221260        | 49962445        | 55394508         | 55519157        |
| # local misassemblies       | 1959             | 1875            | <b>1417</b>     | 2007            | 2186                   | 1985            | 1986             | 1846             | 1935            | 1863            | 1903            | 1903             | 1951            |
| # unaligned mis. contigs    | 97               | 102             | 106             | 106             | 98                     | 99              | 114              | 102              | <b>87</b>       | 110             | 107             | 97               | 110             |
| # unaligned contigs         | 3523 + 877 part  | 2780 + 902 part | 3468 + 863 part | 3507 + 899 part | <b>2298 + 788 part</b> | 3556 + 838 part | 3570 + 887 part  | 3507 + 866 part  | 3302 + 892 part | 3689 + 885 part | 3882 + 966 part | 3518 + 889 part  | 3534 + 887 part |
| Unaligned length            | 8655611          | 7015647         | 8461083         | 8663161         | <b>5974560</b>         | 8325736         | 8619025          | 8700997          | 8247034         | 8400074         | 8510536         | 8653846          | 8692555         |
| Genome fraction (%)         | 94.389           | 94.126          | <b>94.395</b>   | 94.385          | 94.007                 | 94.283          | 94.339           | 94.381           | 94.364          | 94.288          | 94.094          | 94.390           | 94.340          |
| Duplication ratio           | 1.007            | 1.008           | <b>1.006</b>    | 1.007           | 1.007                  | 1.007           | 1.007            | 1.007            | 1.007           | 1.007           | 1.009           | 1.007            | 1.007           |
| # N's per 100 kbp           | 20.77            | 23.70           | 20.46           | 20.90           | <b>19.31</b>           | 24.51           | 21.21            | 21.24            | 19.63           | 25.30           | 21.68           | 19.56            | 20.58           |
| # mismatches per 100 kbp    | 550.95           | 566.10          | 550.06          | 549.94          | 562.32                 | 552.77          | 553.75           | <b>547.82</b>    | 551.94          | 574.04          | 572.70          | 549.10           | 548.28          |
| # indels per 100 kbp        | 131.06           | 137.55          | 132.17          | 130.71          | 134.83                 | 131.25          | 131.77           | <b>130.85</b>    | 131.13          | 132.41          | 132.97          | 130.86           | <b>130.28</b>   |
| Largest alignment           | 446343           | 201781          | 357935          | 428474          | 285019                 | <b>446353</b>   | 406631           | 446139           | 375228          | 269466          | 179030          | 408292           | 408315          |
| Total aligned length        | 113947282        | 113633974       | 113939062       | 113945277       | 113517804              | 113788556       | 113908464        | 113929648        | 113921610       | 113834640       | 113679126       | <b>113911223</b> | 113892633       |
| NA50                        | 59109            | 35127           | 57232           | 57455           | 35199                  | 57276           | 33453            | <b>60755</b>     | 54973           | 47234           | 23144           | 59109            | 54194           |
| NGA50                       | 60554            | 35392           | 58570           | 59441           | 34884                  | 59109           | 54188            | <b>62304</b>     | 56348           | 48994           | 23783           | 60636            | 55841           |
| NA75                        | 24325            | 15983           | 24327           | 23793           | 16032                  | 23582           | 22424            | <b>26073</b>     | 23625           | 20198           | 9811            | 24613            | 22828           |
| NGA75                       | 26503            | 16373           | 26218           | 25875           | 15841                  | 23522           | 24142            | <b>28090</b>     | 23522           | 21704           | 10521           | 26802            | 24540           |
| LA50                        | 570              | 945             | 582             | 575             | 930                    | 576             | 640              | <b>548</b>       | 606             | 700             | 1433            | 564              | 608             |
| LGA50                       | 548              | 932             | 561             | 552             | 936                    | 557             | 616              | <b>526</b>       | 586             | 676             | 1381            | 542              | 585             |
| LA75                        | 1374             | 2222            | 1393            | 1400            | 2202                   | 1399            | 1517             | <b>1307</b>      | 1449            | 1882            | 3435            | 1390             | 1474            |
| LGA75                       | 1295             | 2181            | 1321            | 1318            | 2221                   | 1331            | 1432             | <b>1232</b>      | 1379            | 1598            | 3254            | 1282             | 1392            |

## 4.4 Velvet

### 4.4.1 *B. dentium*

Table 30 contains the Quast report after assembling dataset *B. dentium* with Velvet .

Table 30: Assembly quality metrics for *B. dentium*

| Assembly                    | Uncorrected     | ACE                | BayesHammer  | BFC          | BLESS2      | Blue         | Fiona        | Karect         | Lighter      | Musket       | RACER        | SGA-EC       | Trowel       |
|-----------------------------|-----------------|--------------------|--------------|--------------|-------------|--------------|--------------|----------------|--------------|--------------|--------------|--------------|--------------|
| # contigs (≥ 0 bp)          | 164979          | 73360              | 59552        | 70557        | 44383       | 36024        | 76459        | 30869          | 76687        | 68649        | 49049        | 135918       | 108793       |
| # contigs (≥ 1000 bp)       | 5               | 1                  | 556          | 464          | 792         | 922          | 193          | 926            | 242          | 314          | 916          | 38           | 67           |
| # contigs (≥ 5000 bp)       | 0               | 0                  | 0            | 0            | 5           | 27           | 0            | 27             | 0            | 0            | 21           | 0            | 0            |
| # contigs (≥ 10000 bp)      | 0               | 0                  | 0            | 0            | 0           | 0            | 0            | 1              | 0            | 0            | 1            | 0            | 0            |
| # contigs (≥ 25000 bp)      | 0               | 0                  | 0            | 0            | 0           | 0            | 0            | 0              | 0            | 0            | 0            | 0            | 0            |
| # contigs (≥ 50000 bp)      | 0               | 0                  | 0            | 0            | 0           | 0            | 0            | 0              | 0            | 0            | 0            | 0            | 0            |
| Total length (≥ 0 bp)       | <b>13904588</b> | 5670761            | 8730630      | 9747006      | 7400138     | 7597563      | 9809249      | 7139160        | 10007466     | 9327465      | 8440471      | 12986853     | 11430326     |
| Total length (≥ 1000 bp)    | 5777            | 1010               | 807224       | 666417       | 1372997     | 1876244      | 254328       | <b>1972180</b> | 314586       | 422998       | 1835347      | 43440        | 84111        |
| Total length (≥ 5000 bp)    | 0               | 0                  | 0            | 0            | 30442       | 167860       | 0            | <b>179556</b>  | 0            | 0            | 129097       | 0            | 0            |
| Total length (≥ 10000 bp)   | 0               | 0                  | 0            | 0            | 0           | 0            | 0            | 10815          | 0            | 0            | <b>12218</b> | 0            | 0            |
| Total length (≥ 25000 bp)   | 0               | 0                  | 0            | 0            | 0           | 0            | 0            | 0              | 0            | 0            | 0            | 0            | 0            |
| Total length (≥ 50000 bp)   | 0               | 0                  | 0            | 0            | 0           | 0            | 0            | 0              | 0            | 0            | 0            | 0            | 0            |
| # contigs                   | 508             | 39                 | 2161         | 2003         | 1767        | 1982         | 1581         | 1930           | 1713         | 1894         | 1944         | 925          | 1210         |
| Largest contig              | 1429            | 1010               | 3784         | 4501         | 7416        | 9719         | 3745         | 10815          | 2583         | 3552         | <b>12218</b> | 1758         | 3169         |
| Total length                | 303382          | 22970              | 1878464      | 1687429      | 2058670     | 2584183      | 1153196      | <b>2634272</b> | 1284413      | 1470681      | 2521612      | 591102       | 805395       |
| Reference length            | 2636367         | 2636367            | 2636367      | 2636367      | 2636367     | 2636367      | 2636367      | 2636367        | 2636367      | 2636367      | 2636367      | 2636367      | 2636367      |
| GC (%)                      | 59.89           | 49.27              | 58.96        | 58.91        | 58.56       | 58.75        | 58.62        | 58.81          | 58.80        | 58.86        | 58.70        | 58.75        | 58.91        |
| Reference GC (%)            | 58.54           | 58.54              | 58.54        | 58.54        | 58.54       | 58.54        | 58.54        | 58.54          | 58.54        | 58.54        | 58.54        | 58.54        | 58.54        |
| N50                         | 576             | 552                | 908          | 860          | 1330        | 1660         | 701          | <b>1834</b>    | 733          | 768          | 1638         | 603          | 634          |
| NG50                        | -               | -                  | 676          | 598          | 1054        | 1616         | -            | 1832           | -            | 541          | 1576         | -            | -            |
| N75                         | 540             | 519                | 630          | 617          | 846         | 930          | 580          | <b>993</b>     | 585          | 594          | 945          | 551          | 557          |
| NG75                        | -               | -                  | -            | -            | 553         | 891          | -            | 992            | -            | -            | 851          | -            | -            |
| L50                         | 227             | <b>18</b>          | 695          | 655          | 496         | 468          | 588          | 441            | 625          | 672          | 468          | 387          | 487          |
| LG50                        | -               | -                  | 1184         | 1329         | 739         | 484          | -            | 442            | -            | 1601         | 504          | -            | -            |
| L75                         | 363             | <b>28</b>          | 1323         | 1243         | 978         | 987          | 1045         | 930            | 1119         | 1221         | 974          | 644          | 829          |
| LG75                        | -               | -                  | -            | -            | 1612        | 1030         | -            | 932            | -            | -            | 1070         | -            | -            |
| # misassemblies             | <b>0</b>        | <b>0</b>           | <b>0</b>     | <b>0</b>     | <b>1</b>    | <b>0</b>     | <b>0</b>     | <b>0</b>       | <b>0</b>     | <b>0</b>     | <b>0</b>     | <b>0</b>     | <b>0</b>     |
| # misassembled contigs      | <b>0</b>        | <b>0</b>           | <b>0</b>     | <b>0</b>     | <b>1</b>    | <b>0</b>     | <b>0</b>     | <b>0</b>       | <b>0</b>     | <b>0</b>     | <b>0</b>     | <b>0</b>     | <b>0</b>     |
| Misassembled contigs length | <b>0</b>        | <b>0</b>           | <b>0</b>     | <b>0</b>     | 670         | <b>0</b>     | <b>0</b>     | <b>0</b>       | <b>0</b>     | <b>0</b>     | <b>0</b>     | <b>0</b>     | <b>0</b>     |
| # local misassemblies       | <b>0</b>        | <b>0</b>           | <b>1</b>     | <b>1</b>     | <b>1</b>    | <b>1</b>     | <b>0</b>     | <b>1</b>       | <b>0</b>     | <b>1</b>     | <b>2</b>     | <b>0</b>     | <b>0</b>     |
| # unaligned mis. contigs    | 0               | 0                  | 0            | 0            | 0           | 0            | 0            | 0              | 0            | 0            | 0            | 0            | 0            |
| # unaligned contigs         | 407 + 0 part    | <b>26 + 0 part</b> | 495 + 0 part | 444 + 0 part | 73 + 0 part | 442 + 0 part | 393 + 0 part | 478 + 0 part   | 412 + 0 part | 437 + 0 part | 433 + 0 part | 429 + 0 part | 432 + 0 part |
| Unaligned length            | 241295          | <b>14816</b>       | 296562       | 263972       | 42456       | 264277       | 233261       | 286542         | 244102       | 259091       | 256233       | 254867       | 257078       |
| Genome fraction (%)         | 2.354           | 0.309              | 59.850       | 53.862       | 76.212      | 87.487       | 34.830       | <b>88.672</b>  | 39.390       | 45.889       | 85.597       | 12.748       | 20.785       |
| Duplication ratio           | <b>1.000</b>    | <b>1.000</b>       | 1.003        | 1.002        | 1.003       | 1.006        | 1.002        | 1.004          | 1.002        | 1.001        | 1.004        | <b>1.000</b> | 1.001        |
| # N's per 100 kbp           | <b>0.00</b>     | <b>0.00</b>        | <b>0.00</b>  | <b>0.00</b>  | <b>0.00</b> | <b>0.00</b>  | <b>0.00</b>  | 0.38           | <b>0.00</b>  | <b>0.00</b>  | <b>0.00</b>  | <b>0.00</b>  | <b>0.00</b>  |
| # mismatches per 100 kbp    | 3.22            | <b>0.00</b>        | 1.14         | 0.49         | 0.40        | 0.39         | <b>0.00</b>  | 1.41           | 0.67         | 0.41         | 0.44         | 0.30         | 2.55         |
| # indels per 100 kbp        | <b>0.00</b>     | <b>0.00</b>        | 0.32         | 0.28         | 0.20        | 0.22         | 0.11         | 0.21           | 0.19         | 0.25         | 0.27         | 0.30         | 0.55         |
| Largest alignment           | 1249            | 1010               | 3784         | 4501         | 7416        | 9719         | 3745         | 10815          | 2583         | 3552         | <b>12218</b> | 1442         | 3169         |
| Total aligned length        | 62087           | 8154               | 1581896      | 1423454      | 2016200     | 2319904      | 919929       | <b>2347650</b> | 1040300      | 1211588      | 2265100      | 336235       | 548314       |
| NA50                        | -               | -                  | 895          | 845          | 1330        | 1656         | 678          | 1834           | 715          | 752          | 1637         | 528          | 579          |
| NGA50                       | -               | -                  | 638          | 555          | 1054        | 1611         | -            | 1832           | -            | -            | 1575         | -            | -            |
| NA75                        | -               | -                  | 591          | 579          | 846         | 918          | 522          | 985            | 534          | 549          | 939          | -            | -            |
| NGA75                       | -               | -                  | -            | -            | 532         | 882          | -            | 985            | -            | -            | 838          | -            | -            |
| LA50                        | -               | -                  | 698          | 658          | 496         | 468          | 598          | 441            | 631          | 677          | 468          | 417          | 508          |
| LGA50                       | -               | -                  | 1201         | 1360         | 739         | 484          | -            | 442            | -            | -            | 504          | -            | -            |
| L75                         | -               | -                  | 1349         | 1267         | 978         | 989          | 1081         | 932            | 1152         | 1251         | 975          | -            | -            |
| LGA75                       | -               | -                  | -            | -            | 1619        | 1032         | -            | 933            | -            | -            | 1072         | -            | -            |

#### 4.4.2 *E. coli* str. *K-12* substr. *DH10B*

Table 31 contains the Quast report after assembling dataset *E. coli* str. *K-12* substr. *DH10B* with Velvet .

Table 31: Assembly quality metrics for *E. coli* str. *K-12* substr. *DH10B*

| Assembly                    | ACE        | BayesHammer       | BFC               | BLESS2            | Blue         | Fiona         | Karect            | Lighter           | Musket            | RACER             | SGA-EC            | Trowel            |
|-----------------------------|------------|-------------------|-------------------|-------------------|--------------|---------------|-------------------|-------------------|-------------------|-------------------|-------------------|-------------------|
| # contigs (≥ 0 bp)          | 509        | 491               | 465               | 468               | 451          | 472           | 458               | 502               | 500               | 448               | 174910            | 154264            |
| # contigs (≥ 1000 bp)       | 90         | 87                | 85                | 84                | 81           | 85            | 80                | 89                | 85                | 82                | 0                 | 0                 |
| # contigs (≥ 5000 bp)       | 73         | 72                | 69                | 68                | 69           | 69            | 68                | 73                | 72                | 65                | 0                 | 0                 |
| # contigs (≥ 10000 bp)      | 66         | 65                | 63                | 62                | 63           | 63            | 63                | 68                | 65                | 62                | 0                 | 0                 |
| # contigs (≥ 25000 bp)      | 53         | 54                | 54                | 52                | 51           | 52            | 54                | 56                | 53                | 52                | 0                 | 0                 |
| # contigs (≥ 50000 bp)      | 31         | 29                | 30                | 33                | 31           | 31            | 32                | 30                | 28                | 32                | 0                 | 0                 |
| Total length (≥ 0 bp)       | 4362719    | 4361014           | 4362674           | 4364353           | 4362388      | 4361867       | 4365893           | 4361911           | 4360726           | 4365116           | <b>12078319</b>   | 11049421          |
| Total length (≥ 1000 bp)    | 4324975    | 4325779           | 4329137           | 4330284           | 4329569      | 4327404       | 4332565           | 4325368           | 4324544           | <b>4333539</b>    | 0                 | 0                 |
| Total length (≥ 5000 bp)    | 4286089    | 4294343           | 4295276           | 4294887           | 4306420      | 4289532       | <b>4307659</b>    | 4286673           | 4295327           | 4293367           | 0                 | 0                 |
| Total length (≥ 10000 bp)   | 4232622    | 4236996           | 4248144           | 4248584           | 4259350      | 4240854       | 4268850           | 4246908           | 4240129           | <b>4269045</b>    | 0                 | 0                 |
| Total length (≥ 25000 bp)   | 4018923    | 4072492           | 4119676           | 4097964           | 4078566      | 4068100       | 4120739           | 4056582           | 4050242           | <b>4120791</b>    | 0                 | 0                 |
| Total length (≥ 50000 bp)   | 3239468    | 3169522           | 3232522           | <b>3417084</b>    | 3366933      | 3325363       | 3348823           | 3104697           | 3150091           | 3404809           | 0                 | 0                 |
| # contigs                   | 97         | 92                | 89                | 89                | 85           | 92            | 85                | 97                | 93                | 87                | 13                | 23                |
| Largest contig              | 299060     | 269346            | 269332            | 325957            | 326035       | <b>326112</b> | 269392            | 269442            | 269320            | 269372            | 709               | 772               |
| Total length                | 4330157    | 4329486           | 4331937           | 4333660           | 4332755      | 4332343       | 4336380           | 4331396           | 4330245           | <b>4337347</b>    | 7189              | 13177             |
| Reference length            | 4686137    | 4686137           | 4686137           | 4686137           | 4686137      | 4686137       | 4686137           | 4686137           | 4686137           | 4686137           | 4686137           | 4686137           |
| GC (%)                      | 50.76      | 50.75             | 50.76             | 50.76             | 50.75        | 50.75         | 50.75             | 50.75             | 50.74             | 50.75             | 47.38             | 48.72             |
| Reference GC (%)            | 50.78      | 50.78             | 50.78             | 50.78             | 50.78        | 50.78         | 50.78             | 50.78             | 50.78             | 50.78             | 50.78             | 50.78             |
| N50                         | 82393      | 86789             | 86856             | 85634             | 86758        | 86869         | 85563             | 82246             | 88175             | <b>94801</b>      | 543               | 572               |
| NG50                        | 80642      | 82312             | 82298             | 80585             | 82465        | 82297         | 82028             | 77343             | 82274             | <b>86919</b>      | -                 | -                 |
| N75                         | 48577      | 48022             | 49515             | 53169             | <b>54670</b> | 53109         | 53162             | 47476             | 45352             | 54645             | 523               | 527               |
| NG75                        | 41209      | 41209             | 41209             | <b>48720</b>      | 42578        | 41209         | 43173             | 40034             | 40673             | 43982             | -                 | -                 |
| L50                         | 16         | 15                | 15                | 14                | 14           | 14            | 15                | 16                | 14                | 14                | <b>7</b>          | 11                |
| LG50                        | 18         | 17                | 17                | <b>16</b>         | <b>16</b>    | <b>16</b>     | 17                | 18                | 17                | <b>16</b>         | -                 | -                 |
| L75                         | 32         | 31                | 31                | <b>30</b>         | <b>29</b>    | 30            | 31                | 33                | 31                | <b>30</b>         | <b>10</b>         | 17                |
| LG75                        | 38         | 37                | 37                | <b>35</b>         | <b>35</b>    | 36            | 36                | 40                | 37                | <b>35</b>         | -                 | -                 |
| # misassemblies             | 7          | 10                | 2                 | 5                 | 9            | 4             | 8                 | 10                | 7                 | 13                | <b>0</b>          | <b>0</b>          |
| # misassembled contigs      | 5          | 6                 | 2                 | 5                 | 7            | 4             | 6                 | 8                 | 6                 | 9                 | <b>0</b>          | <b>0</b>          |
| Misassembled contigs length | 477123     | 372804            | 92189             | 353248            | 456378       | 261461        | 439383            | 459105            | 481833            | 778996            | <b>0</b>          | <b>0</b>          |
| # local misassemblies       | 64         | 39                | 34                | 30                | 46           | 38            | 31                | 49                | 50                | 42                | <b>0</b>          | <b>0</b>          |
| # structural variations     | 0          | 0                 | 0                 | 0                 | 0            | 0             | 0                 | 0                 | 0                 | 0                 | <b>0</b>          | <b>0</b>          |
| # unaligned mis. contigs    | 0          | 0                 | 0                 | 0                 | 0            | 0             | 0                 | 0                 | 0                 | 0                 | <b>0</b>          | <b>0</b>          |
| # unaligned contigs         | 0 + 1 part | <b>0 + 0 part</b> | <b>0 + 0 part</b> | <b>0 + 0 part</b> | 0 + 1 part   | 0 + 1 part    | <b>0 + 0 part</b> | <b>0 + 0 part</b> | <b>0 + 0 part</b> | <b>0 + 0 part</b> | <b>0 + 0 part</b> | <b>0 + 0 part</b> |
| Unaligned length            | 1677       | <b>0</b>          | <b>0</b>          | <b>0</b>          | 617          | 1037          | <b>0</b>          | <b>0</b>          | <b>0</b>          | <b>0</b>          | <b>0</b>          | <b>0</b>          |
| Genome fraction (%)         | 92.269     | 92.246            | 92.323            | 92.398            | 92.347       | 92.360        | <b>92.455</b>     | 92.281            | 92.281            | 92.420            | 0.153             | 0.281             |
| Duplication ratio           | 1.001      | 1.002             | 1.001             | 1.001             | 1.001        | 1.001         | 1.001             | 1.002             | 1.001             | 1.001             | <b>1.000</b>      | <b>1.000</b>      |
| # N's per 100 kbp           | 113.44     | 186.37            | 125.44            | 105.66            | 75.17        | 125.31        | 85.79             | 172.60            | 181.54            | 132.92            | <b>0.00</b>       | <b>0.00</b>       |
| # mismatches per 100 kbp    | 23.59      | 46.89             | 22.40             | 19.86             | 21.77        | 32.12         | 32.20             | 33.69             | 34.20             | 30.25             | <b>0.00</b>       | <b>0.00</b>       |
| # indels per 100 kbp        | 14.18      | 17.91             | 10.72             | 7.60              | 9.75         | 11.51         | 5.72              | 19.03             | 15.98             | 14.52             | <b>0.00</b>       | <b>0.00</b>       |
| Largest alignment           | 298898     | 269196            | 269332            | 325947            | 325917       | <b>326112</b> | 269392            | 269344            | 269225            | 269372            | 709               | 772               |
| Total aligned length        | 4323443    | 4322221           | 4326571           | 4329544           | 4327068      | 4328251       | <b>4333032</b>    | 4323907           | 4323828           | 4331580           | 7189              | 13177             |
| NA50                        | 82293      | 85134             | 86856             | 82180             | 85556        | 85328         | 85563             | 82137             | <b>86912</b>      | 82221             | 543               | 572               |
| NGA50                       | 75911      | 80601             | <b>82198</b>      | 80193             | 80440        | 80741         | 80714             | 76130             | 82166             | 77233             | -                 | -                 |
| NA75                        | 44020      | 43628             | 48685             | <b>48720</b>      | 47405        | <b>48720</b>  | 48718             | 42528             | 42953             | 47742             | 523               | 527               |
| NGA75                       | 35956      | 38583             | 40090             | 40155             | 40137        | <b>40443</b>  | 40154             | 33756             | 38652             | 39931             | -                 | -                 |
| LA50                        | 16         | 15                | 15                | 15                | 15           | 15            | 15                | 16                | 15                | 16                | <b>7</b>          | 11                |
| LGA50                       | 19         | <b>17</b>         | <b>17</b>         | <b>17</b>         | <b>17</b>    | <b>17</b>     | <b>17</b>         | <b>17</b>         | <b>17</b>         | 18                | -                 | -                 |
| LA75                        | 34         | 33                | 31                | 31                | 31           | 31            | 32                | 34                | 32                | 33                | <b>10</b>         | 17                |
| LGA75                       | 41         | 39                | <b>37</b>         | <b>37</b>         | <b>37</b>    | <b>37</b>     | 38                | 41                | 38                | 39                | -                 | -                 |



#### 4.4.3 *E. coli str. K-12 substr. MG1655*

Table 32 contains the Quast report after assembling dataset *E. coli str. K-12 substr. MG1655* with Velvet .

Table 32: Assembly quality metrics for *E. coli str. K-12 substr. MG1655*

| Assembly                    | Uncorrected     | ACE            | BayesHammer | BFC         | BLESS2            | Blue              | Fiona             | Karect            | Lighter           | Musket     | RACER             | SGA-EC            | Trowel      |            |
|-----------------------------|-----------------|----------------|-------------|-------------|-------------------|-------------------|-------------------|-------------------|-------------------|------------|-------------------|-------------------|-------------|------------|
| # contigs (≥ 0 bp)          | 339266          | 626            | 47416       | 12544       | 556               | 572               | 605               | 584               | 621               | 637        | 566               | 254087            | 42939       |            |
| # contigs (≥ 1000 bp)       | 0               | 108            | 0           | 1543        | 110               | 117               | 112               | 106               | 115               | 111        | 116               | 1                 | 300         |            |
| # contigs (≥ 5000 bp)       | 0               | 88             | 0           | 11          | 86                | 92                | 90                | 85                | 93                | 89         | 90                | 0                 | 1           |            |
| # contigs (≥ 10000 bp)      | 0               | 79             | 0           | 0           | 76                | 81                | 80                | 77                | 84                | 78         | 80                | 0                 | 0           |            |
| # contigs (≥ 25000 bp)      | 0               | 59             | 0           | 0           | 57                | 58                | 58                | 58                | 60                | 59         | 57                | 0                 | 0           |            |
| # contigs (≥ 50000 bp)      | 0               | 32             | 0           | 0           | 35                | 33                | 33                | 33                | 33                | 33         | 34                | 0                 | 0           |            |
| Total length (≥ 0 bp)       | <b>17463920</b> | 4568487        | 2369763     | 4817502     | 4566297           | 4565654           | 4564079           | 4562902           | 4566027           | 4566259    | 4567503           | 14472372          | 5409096     |            |
| Total length (≥ 1000 bp)    | 0               | 4519097        | 0           | 2706314     | 4523572           | 4522624           | 4517645           | 4518802           | 4519150           | 4518503    | <b>4524463</b>    | 1446              | 408072      |            |
| Total length (≥ 5000 bp)    | 0               | <b>4475899</b> | 0           | 63787       | 4472985           | 4469468           | 4471178           | 4475747           | 4474711           | 4473760    | 4467668           | 0                 | 5985        |            |
| Total length (≥ 10000 bp)   | 0               | 4409903        | 0           | 0           | 4396521           | 4383548           | 4392999           | <b>4415938</b>    | 4404793           | 4388487    | 4391238           | 0                 | 0           |            |
| Total length (≥ 25000 bp)   | 0               | 4089760        | 0           | 0           | 4089935           | 4022552           | 4051345           | <b>4122523</b>    | 4002782           | 4084172    | 4024529           | 0                 | 0           |            |
| Total length (≥ 50000 bp)   | 0               | 3112482        | 0           | 0           | <b>3283699</b>    | 3114815           | 3112477           | 3205490           | 3055689           | 3171801    | 3206713           | 0                 | 0           |            |
| # contigs                   | 3               | 121            | 3           | 3067        | 121               | 128               | 124               | 118               | 125               | 124        | 126               | 67                | 1980        |            |
| Largest contig              | 867             | 181755         | 840         | 7490        | 174070            | 179238            | <b>232264</b>     | 208709            | 223529            | 194669     | 174310            | 1446              | 5985        |            |
| Total length                | 2185            | 4528167        | 2268        | 3794237     | 4531713           | 4530848           | 4526320           | 4527131           | 4526451           | 4527527    | <b>4531785</b>    | 41034             | 1530231     |            |
| Reference length            | 4639675         | 4639675        | 4639675     | 4639675     | 4639675           | 4639675           | 4639675           | 4639675           | 4639675           | 4639675    | 4639675           | 4639675           | 4639675     |            |
| GC (%)                      | 44.94           | 50.73          | 45.02       | 50.40       | 50.72             | 50.73             | 50.72             | 50.73             | 50.72             | 50.72      | 50.72             | 38.88             | 47.47       |            |
| Reference GC (%)            | 50.79           | 50.79          | 50.79       | 50.79       | 50.79             | 50.79             | 50.79             | 50.79             | 50.79             | 50.79      | 50.79             | 50.79             | 50.79       |            |
| N50                         | 808             | <b>86050</b>   | 808         | 1418        | 80449             | 77816             | 68741             | 82565             | 67426             | 83207      | 82551             | 581               | 756         |            |
| NG50                        | -               | 82691          | -           | 1187        | 80449             | 77816             | 68741             | 82565             | 66935             | 80447      | 80476             | -                 | -           |            |
| N75                         | 808             | 42208          | 620         | 933         | <b>45313</b>      | 41989             | 42494             | 43670             | 41230             | 42252      | 42938             | 530               | 610         |            |
| NG75                        | -               | 41209          | -           | 634         | 42451             | 41057             | 41773             | 42284             | 39834             | 41187      | 42459             | -                 | -           |            |
| L50                         | <b>2</b>        | 20             | <b>2</b>    | 863         | 20                | 20                | 20                | 19                | 20                | 19         | 20                | 29                | 716         |            |
| LG50                        | -               | 21             | -           | 1188        | 20                | 20                | 20                | 19                | 21                | 20         | 21                | -                 | -           |            |
| L75                         | <b>2</b>        | 39             | 3           | 1688        | 38                | 40                | 40                | 38                | 41                | 39         | 39                | 47                | 1283        |            |
| LG75                        | -               | 41             | -           | 2513        | 40                | 42                | 42                | 40                | 43                | 41         | 40                | -                 | -           |            |
| # misassemblies             | -               | 21             | -           | 0           | 5                 | 13                | 23                | 3                 | 13                | 10         | 9                 | 0                 | 0           |            |
| # misassembled contigs      | -               | 12             | -           | 0           | 5                 | 8                 | 13                | 2                 | 9                 | 9          | 6                 | 0                 | 0           |            |
| Misassembled contigs length | -               | 1157326        | -           | 0           | 470209            | 704224            | 1125585           | 390367            | 938837            | 851796     | 543312            | 0                 | 0           |            |
| # local misassemblies       | -               | 34             | -           | 0           | 14                | 16                | 15                | 13                | 18                | 9          | 28                | 0                 | 0           |            |
| # unaligned mis. contigs    | -               | 0              | -           | 0           | 1                 | 0                 | 0                 | 0                 | 1                 | 0          | 0                 | 0                 | 0           |            |
| # unaligned contigs         | 3 + 0 part      | 0 + 1 part     | 3 + 0 part  | 4 + 0 part  | <b>0 + 0 part</b> | <b>0 + 0 part</b> | <b>0 + 0 part</b> | <b>0 + 0 part</b> | <b>0 + 0 part</b> | 0 + 1 part | <b>0 + 0 part</b> | <b>0 + 0 part</b> | 4 + 0 part  | 4 + 0 part |
| Unaligned length            | 2185            | 966            | 2268        | 2876        | <b>0</b>          | <b>0</b>          | <b>0</b>          | <b>0</b>          | <b>0</b>          | 580        | <b>0</b>          | <b>0</b>          | 2849        | 2885       |
| Genome fraction (%)         | -               | 97.314         | -           | 81.498      | 97.505            | 97.416            | 97.341            | 97.477            | 97.294            | 97.360     | 97.427            | 0.823             | 32.888      |            |
| Duplication ratio           | -               | 1.003          | -           | 1.003       | 1.002             | 1.002             | 1.002             | 1.001             | 1.003             | 1.002      | 1.003             | 1.000             | 1.001       |            |
| # N's per 100 kbp           | <b>0.00</b>     | 209.33         | <b>0.00</b> | <b>0.00</b> | 242.40            | 249.20            | 248.83            | 121.36            | 311.04            | 324.42     | 251.69            | <b>0.00</b>       | <b>0.00</b> |            |
| # mismatches per 100 kbp    | -               | 28.31          | -           | 13.38       | 17.00             | 14.25             | 27.50             | 30.23             | 30.46             | 38.63      | 29.07             | 0.00              | 16.38       |            |
| # indels per 100 kbp        | -               | 13.82          | -           | 2.49        | 9.81              | 7.90              | 13.48             | 7.83              | 18.59             | 21.58      | 14.16             | 0.00              | 1.77        |            |
| Largest alignment           | -               | 165214         | -           | 7490        | 174070            | 164078            | 173882            | 165316            | 163894            | 173710     | 173960            | 1446              | 5985        |            |
| Total aligned length        | -               | 4516869        | -           | 3790989     | 4525352           | 4521152           | 4517437           | 4522868           | 4514747           | 4519081    | 4521328           | 38185             | 1527204     |            |
| NA50                        | -               | 63339          | -           | 1418        | 67256             | 67120             | 61390             | 80344             | 60834             | 60803      | 67089             | 568               | 755         |            |
| NGA50                       | -               | 63339          | -           | 1187        | 66500             | 63276             | 60805             | 80344             | 59372             | 60803      | 65967             | -                 | -           |            |
| NA75                        | -               | 39943          | -           | 933         | 42223             | 39213             | 39194             | 43540             | 35870             | 41187      | 41209             | 513               | 609         |            |
| NGA75                       | -               | 35877          | -           | 633         | 41781             | 35852             | 38151             | 42197             | 33397             | 39885      | 39168             | -                 | -           |            |
| LA50                        | -               | 24             | -           | 863         | 21                | 22                | 25                | 20                | 24                | 22         | 22                | 30                | 716         |            |
| LGA50                       | -               | 24             | -           | 1189        | 22                | 23                | 26                | 20                | 25                | 22         | 23                | -                 | -           |            |
| LA75                        | -               | 47             | -           | 1688        | 42                | 45                | 48                | 39                | 49                | 44         | 43                | 49                | 1284        |            |
| LGA75                       | -               | 50             | -           | 2514        | 44                | 47                | 50                | 41                | 51                | 46         | 45                | -                 | -           |            |

#### 4.4.4 *S. enterica*

Table 33 contains the Quast report after assembling dataset *S. enterica* with Velvet .

Table 33: Assembly quality metrics for *S. enterica*

|                             |                 |            |             |            |            |              |            |                |             |            |                |                   |              |
|-----------------------------|-----------------|------------|-------------|------------|------------|--------------|------------|----------------|-------------|------------|----------------|-------------------|--------------|
| Assembly                    | Uncorrected     | ACE        | BayesHammer | BFC        | BLESS2     | Blue         | Fiona      | Karect         | Lighter     | Musket     | RACER          | SGA-EC            | Trowel       |
| # contigs (≥ 0 bp)          | 236914          | 606        | 610         | 702        | 553        | 516          | 784        | 494            | 928         | 679        | 490            | 185562            | 137268       |
| # contigs (≥ 1000 bp)       | 0               | 123        | 125         | 219        | 119        | 89           | 265        | 74             | 337         | 188        | 74             | 0                 | 2            |
| # contigs (≥ 5000 bp)       | 0               | 88         | 80          | 131        | 76         | 62           | 159        | 57             | 170         | 116        | 53             | 0                 | 0            |
| # contigs (≥ 10000 bp)      | 0               | 74         | 69          | 89         | 64         | 54           | 103        | 49             | 110         | 83         | 45             | 0                 | 0            |
| # contigs (≥ 25000 bp)      | 0               | 50         | 49          | 37         | 46         | 41           | 38         | 42             | 35          | 45         | 37             | 0                 | 0            |
| # contigs (≥ 50000 bp)      | 0               | 32         | 31          | 19         | 25         | 30           | 21         | 31             | 19          | 28         | 25             | 0                 | 0            |
| Total length (≥ 0 bp)       | <b>16980980</b> | 4778207    | 4780385     | 4785569    | 4782707    | 4785804      | 4780122    | 4782938        | 4783429     | 4783406    | 4785994        | 14944644          | 12032854     |
| Total length (≥ 1000 bp)    | 0               | 4725851    | 4728507     | 4722559    | 4734464    | 4738927      | 4715446    | 4740353        | 4696102     | 4726461    | <b>4740565</b> | 0                 | 2320         |
| Total length (≥ 5000 bp)    | 0               | 4640618    | 4619869     | 4486056    | 4627089    | 4672336      | 4442614    | <b>4703375</b> | 4251262     | 4534404    | 4691878        | 0                 | 0            |
| Total length (≥ 10000 bp)   | 0               | 4536709    | 4542588     | 4173914    | 4535891    | 4615276      | 4042426    | <b>4642891</b> | 3826601     | 4294979    | 4634956        | 0                 | 0            |
| Total length (≥ 25000 bp)   | 0               | 4128922    | 4247177     | 3356126    | 4269112    | 4428501      | 3068026    | <b>4533152</b> | 2717304     | 3707912    | 4513196        | 0                 | 0            |
| Total length (≥ 50000 bp)   | 0               | 3506624    | 3601272     | 2725881    | 3527369    | 4046246      | 2475977    | <b>4169579</b> | 2145483     | 3149161    | 4084512        | 0                 | 0            |
| # contigs                   | 9               | 136        | 139         | 246        | 133        | 103          | 290        | 86             | 382         | 207        | 86             | 53                | 208          |
| Largest contig              | 684             | 376781     | 383910      | 329670     | 330926     | 465834       | 297231     | 395892         | 251830      | 297189     | <b>590715</b>  | 977               | 1164         |
| Total length                | 4938            | 4734253    | 4737412     | 4741900    | 4743751    | 4748024      | 4733128    | 4747774        | 4729466     | 4739328    | <b>4748477</b> | 31165             | 125991       |
| Reference length            | 4888768         | 4888768    | 4888768     | 4888768    | 4888768    | 4888768      | 4888768    | 4888768        | 4888768     | 4888768    | 4888768        | 4888768           | 4888768      |
| GC (%)                      | 51.44           | 52.15      | 52.14       | 52.13      | 52.13      | 52.13        | 52.13      | 52.13          | 52.13       | 52.13      | 52.12          | 48.67             | 50.77        |
| Reference GC (%)            | 52.09           | 52.09      | 52.09       | 52.09      | 52.09      | 52.09        | 52.09      | 52.09          | 52.09       | 52.09      | 52.09          | 52.09             | 52.09        |
| N50                         | 543             | 77913      | 113532      | 79951      | 121679     | 148114       | 64795      | 159595         | 38266       | 79565      | <b>170051</b>  | 571               | 597          |
| NG50                        | -               | 75950      | 113466      | 74996      | 115686     | 116587       | 63079      | 159595         | 34856       | 77960      | 170051         | -                 | -            |
| N75                         | 503             | 49652      | 50887       | 19679      | 49854      | <b>72911</b> | 15489      | 72527          | 12322       | 28154      | 72692          | 533               | 538          |
| NG75                        | -               | 41430      | 46030       | 17932      | 46529      | 72565        | 13399      | 71471          | 10899       | 26138      | 72527          | -                 | -            |
| L50                         | <b>5</b>        | 16         | 14          | 14         | 12         | 10           | 20         | 10             | 25          | 16         | 8              | 24                | 91           |
| LG50                        | -               | 17         | 15          | 15         | 13         | 11           | 21         | 10             | 27          | 17         | 8              | -                 | -            |
| L75                         | <b>7</b>        | 33         | 31          | 46         | 26         | 23           | 64         | 22             | 85          | 40         | 18             | 38                | 148          |
| LG75                        | -               | 36         | 33          | 52         | 28         | 25           | 72         | 23             | 95          | 44         | 19             | -                 | -            |
| # misassemblies             | 0               | 17         | 14          | 16         | 20         | 18           | 12         | 19             | 12          | 15         | 21             | <b>0</b>          | <b>0</b>     |
| # misassembled contigs      | 0               | 14         | 12          | 13         | 13         | 11           | 10         | 13             | 12          | 13         | 11             | <b>0</b>          | <b>0</b>     |
| Misassembled contigs length | 0               | 1661007    | 1372517     | 1655245    | 1842140    | 2131028      | 1196243    | 2286736        | 975040      | 1582981    | 2523514        | <b>0</b>          | <b>0</b>     |
| # local misassemblies       | 0               | 76         | 75          | 51         | 61         | 53           | 47         | 39             | 32          | 51         | 59             | <b>0</b>          | <b>0</b>     |
| # unaligned mis. contigs    | 0               | <b>0</b>   | 1           | <b>0</b>   | <b>0</b>   | <b>0</b>     | <b>0</b>   | <b>0</b>       | <b>0</b>    | <b>0</b>   | <b>0</b>       | <b>0</b>          | <b>0</b>     |
| # unaligned contigs         | 2 + 0 part      | 5 + 6 part | 6 + 7 part  | 7 + 2 part | 5 + 5 part | 5 + 5 part   | 8 + 3 part | 5 + 6 part     | 10 + 4 part | 5 + 7 part | 4 + 5 part     | <b>0 + 0 part</b> | 2 + 0 part   |
| Unaligned length            | 1004            | 59327      | 61619       | 60007      | 59656      | 60395        | 60053      | 59745          | 58892       | 59686      | 61859          | <b>0</b>          | 1049         |
| Genome fraction (%)         | 0.080           | 95.526     | 95.561      | 95.648     | 95.687     | 95.799       | 95.483     | <b>95.843</b>  | 95.387      | 95.622     | 95.803         | 0.637             | 2.553        |
| Duplication ratio           | <b>1.000</b>    | 1.001      | 1.001       | 1.001      | 1.001      | 1.001        | 1.001      | 1.001          | 1.002       | 1.001      | 1.001          | <b>1.000</b>      | 1.001        |
| # N's per 100 kbp           | <b>0.00</b>     | 99.57      | 110.04      | 72.86      | 116.15     | 59.86        | 82.42      | 76.23          | 53.28       | 95.82      | 76.49          | <b>0.00</b>       | <b>0.00</b>  |
| # mismatches per 100 kbp    | 177.94          | 19.79      | 19.16       | 14.20      | 18.98      | 19.30        | 16.82      | 21.45          | 14.60       | 17.11      | 18.58          | 22.46             | <b>10.41</b> |
| # indels per 100 kbp        | <b>0.00</b>     | 5.16       | 4.99        | 2.95       | 3.42       | 4.44         | 4.48       | 4.74           | 3.07        | 5.01       | 4.29           | <b>0.00</b>       | <b>0.00</b>  |
| Largest alignment           | 684             | 183671     | 218248      | 215441     | 233900     | 219065       | 215581     | 233926         | 215296      | 215652     | <b>377102</b>  | 977               | 1164         |
| Total aligned length        | 3934            | 4670996    | 4671740     | 4678407    | 4679569    | 4685321      | 4669888    | <b>4685535</b> | 4667366     | 4675991    | 4684623        | 31165             | 124824       |
| NA50                        | 543             | 74294      | 84701       | 57033      | 106301     | 100709       | 44474      | 113291         | 35004       | 69369      | <b>113670</b>  | 571               | 596          |
| NGA50                       | -               | 73998      | 82002       | 52943      | 106301     | 100709       | 42286      | 113291         | 32911       | 64433      | 106015         | -                 | -            |
| NA75                        | 502             | 40494      | 44347       | 18740      | 43571      | <b>67823</b> | 15059      | 62786          | 11835       | 27284      | 67822          | 533               | 536          |
| NGA75                       | -               | 37947      | 40502       | 17163      | 40561      | 60633        | 13120      | 60793          | 10626       | 24011      | 62447          | -                 | -            |
| LA50                        | <b>5</b>        | 20         | 17          | 19         | 16         | 17           | 25         | 15             | 29          | 21         | 12             | 24                | 91           |
| LGA50                       | -               | 21         | 18          | 21         | 16         | 17           | 27         | 15             | 31          | 22         | 13             | -                 | -            |
| LA75                        | <b>7</b>        | 40         | 36          | 56         | 34         | 31           | 73         | 29             | 92          | 48         | 26             | 38                | 148          |
| LGA75                       | -               | 43         | 39          | 63         | 36         | 33           | 82         | 31             | 103         | 53         | 28             | -                 | -            |

#### 4.4.5 *P. aeruginosa*

Table 34 contains the Quast report after assembling dataset *P. aeruginosa* with Velvet .

Table 34: Assembly quality metrics for *P. aeruginosa*

| Assembly                    | Uncorrected    | ACE        | BayesHammer  | BFC               | BLESS2        | Blue          | Fiona        | Karect         | Lighter    | Musket       | RACER          | SGA-EC     | Trowel     |
|-----------------------------|----------------|------------|--------------|-------------------|---------------|---------------|--------------|----------------|------------|--------------|----------------|------------|------------|
| # contigs (≥ 0 bp)          | 6427           | 2157       | 1659         | 1464              | 1172          | 1207          | 1371         | 1117           | 2156       | 1783         | 1115           | 2128       | 1982       |
| # contigs (≥ 1000 bp)       | 1632           | 563        | 414          | 419               | 254           | 291           | 368          | 239            | 654        | 506          | 249            | 730        | 638        |
| # contigs (≥ 5000 bp)       | 112            | 137        | 140          | 148               | 124           | 129           | 136          | 124            | 142        | 141          | 128            | 174        | 154        |
| # contigs (≥ 10000 bp)      | 36             | 74         | 71           | 76                | 80            | 75            | 74           | 81             | 70         | 70           | 81             | 69         | 69         |
| # contigs (≥ 25000 bp)      | 13             | 44         | 49           | 43                | 47            | 49            | 48           | 43             | 43         | 43           | 47             | 44         | 34         |
| # contigs (≥ 50000 bp)      | 4              | 25         | 29           | 23                | 29            | 28            | 29           | 29             | 22         | 26           | 27             | 22         | 23         |
| Total length (≥ 0 bp)       | <b>6346020</b> | 6285231    | 6268654      | 6260914           | 6262363       | 6263784       | 6259600      | 6259177        | 6272493    | 6266341      | 6262912        | 6267223    | 6264247    |
| Total length (≥ 1000 bp)    | 4750667        | 5952470    | 6034708      | 6062139           | 6116375       | 6114471       | 6080305      | <b>6124380</b> | 5908040    | 6005704      | 6123214        | 5934797    | 5955713    |
| Total length (≥ 5000 bp)    | 1814873        | 4976928    | 5382652      | 5396892           | 5807885       | 5708795       | 5484607      | <b>5839731</b> | 4694888    | 5145507      | 5829866        | 4634435    | 4821830    |
| Total length (≥ 10000 bp)   | 1315345        | 4541808    | 4910354      | 4890158           | 5487031       | 5314653       | 5030382      | <b>5528596</b> | 4208048    | 4660558      | 5491925        | 3914787    | 4262171    |
| Total length (≥ 25000 bp)   | 949575         | 4069767    | 4608549      | 4378326           | 4984773       | 4933517       | 4665902      | 4956980        | 3749942    | 4253437      | <b>4985637</b> | 3558546    | 3731171    |
| Total length (≥ 50000 bp)   | 637615         | 3413547    | 3872046      | 3689217           | 4333071       | 4222801       | 4022261      | <b>4458330</b> | 2969521    | 3619810      | 4248604        | 2767450    | 3372642    |
| # contigs                   | 2880           | 769        | 537          | 528               | 319           | 361           | 462          | 298            | 901        | 658          | 315            | 952        | 838        |
| Largest contig              | 226239         | 328059     | 570411       | 322996            | 339286        | <b>571909</b> | 321732       | 571477         | 510496     | 539052       | 390592         | 359236     | 353318     |
| Total length                | 5653892        | 6098246    | 6123822      | 6140602           | 6161700       | 6162690       | 6147408      | 6164910        | 6088141    | 6113380      | <b>6168877</b> | 6093952    | 6100522    |
| Reference length            | 6264404        | 6264404    | 6264404      | 6264404           | 6264404       | 6264404       | 6264404      | 6264404        | 6264404    | 6264404      | 6264404        | 6264404    | 6264404    |
| GC (%)                      | 66.51          | 66.57      | 66.58        | 66.59             | 66.58         | 66.58         | 66.59        | 66.58          | 66.58      | 66.58        | 66.57          | 66.59      | 66.59      |
| Reference GC (%)            | 66.56          | 66.56      | 66.56        | 66.56             | 66.56         | 66.56         | 66.56        | 66.56          | 66.56      | 66.56        | 66.56          | 66.56      | 66.56      |
| N50                         | 2619           | 64599      | 88629        | 109138            | 120313        | <b>127693</b> | 108906       | 110138         | 47837      | 78352        | 119291         | 38051      | 84256      |
| NG50                        | 2265           | 60742      | 78726        | 89930             | <b>119565</b> | 117737        | 108906       | 110138         | 46385      | 70540        | 118598         | 37313      | 69066      |
| N75                         | 1298           | 9231       | 25007        | 18252             | 41167         | 32431         | 25484        | <b>42712</b>   | 5758       | 11152        | 38042          | 5176       | 6390       |
| NG75                        | 1040           | 7832       | 17828        | 14456             | 36170         | 31710         | 21018        | <b>37686</b>   | 4988       | 9608         | 36985          | 4699       | 5662       |
| L50                         | 404            | 19         | 17           | 15                | 13            | 13            | 17           | <b>11</b>      | 24         | 17           | 14             | 29         | 18         |
| LG50                        | 529            | 20         | 18           | 16                | 14            | 14            | 17           | <b>11</b>      | 26         | 18           | 15             | 31         | 19         |
| L75                         | 1187           | 78         | 49           | 54                | 36            | 39            | 46           | <b>33</b>      | 118        | 63           | 36             | 162        | 111        |
| LG75                        | 1581           | 92         | 54           | 60                | 38            | 41            | 50           | <b>35</b>      | 143        | 74           | 38             | 188        | 131        |
| # misassemblies             | <b>9</b>       | 36         | 25           | 10                | 25            | 34            | 31           | 24             | 25         | 33           | 28             | 25         | 26         |
| # misassembled contigs      | <b>6</b>       | 18         | 13           | 9                 | 17            | 16            | 20           | 15             | 17         | 23           | 20             | 17         | 16         |
| Misassembled contigs length | <b>231350</b>  | 2447728    | 1089713      | 1025513           | 2079252       | 1690556       | 1712040      | 1562762        | 1779078    | 2011805      | 2230473        | 1542709    | 1746394    |
| # local misassemblies       | <b>100</b>     | 224        | 169          | 121               | 161           | 139           | 135          | 154            | 183        | 187          | 151            | 126        | 150        |
| # unaligned mis. contigs    | <b>0</b>       | <b>0</b>   | <b>0</b>     | <b>0</b>          | <b>0</b>      | <b>0</b>      | <b>0</b>     | <b>0</b>       | <b>1</b>   | <b>0</b>     | <b>0</b>       | <b>0</b>   | <b>0</b>   |
| # unaligned contigs         | 5 + 2 part     | 2 + 5 part | 1 + 3 part   | <b>1 + 2 part</b> | 1 + 3 part    | 2 + 4 part    | 1 + 4 part   | 2 + 3 part     | 2 + 7 part | 2 + 6 part   | 1 + 6 part     | 1 + 5 part | 1 + 7 part |
| Unaligned length            | 12588          | 14810      | 10655        | <b>10101</b>      | 10880         | 15012         | 13650        | 11686          | 15543      | 15307        | 14447          | 14247      | 16755      |
| Genome fraction (%)         | 89.452         | 96.792     | 97.408       | 97.657            | 97.964        | 97.931        | 97.733       | <b>98.057</b>  | 96.676     | 97.177       | 98.040         | 96.808     | 96.870     |
| Duplication ratio           | 1.007          | 1.003      | <b>1.002</b> | <b>1.002</b>      | <b>1.002</b>  | <b>1.002</b>  | <b>1.002</b> | <b>1.002</b>   | 1.003      | <b>1.002</b> | <b>1.002</b>   | 1.003      | 1.003      |
| # N's per 100 kbp           | <b>118.04</b>  | 244.58     | 219.83       | 161.30            | 192.12        | 176.45        | 192.72       | 197.88         | 224.50     | 227.53       | 192.55         | 186.97     | 218.33     |
| # mismatches per 100 kbp    | 39.63          | 15.06      | 21.86        | 11.38             | <b>11.13</b>  | 13.09         | 16.15        | 23.75          | 20.34      | 17.68        | 15.42          | 26.70      | 34.38      |
| # indels per 100 kbp        | <b>12.03</b>   | 17.37      | 18.63        | 12.91             | 13.22         | 12.68         | 16.53        | 15.61          | 18.92      | 18.20        | 14.52          | 17.36      | 20.25      |
| Largest alignment           | 226050         | 298012     | 570020       | 322354            | 339246        | <b>571467</b> | 321649       | 571031         | 395446     | 478427       | 311783         | 288241     | 352989     |
| Total aligned length        | 5636890        | 6074306    | 6105782      | 6124234           | 6144447       | 6142551       | 6129358      | 6146957        | 6066401    | 6092744      | <b>6148772</b> | 6074595    | 6078072    |
| NA50                        | 2594           | 51100      | 73325        | 89839             | 105318        | 92668         | 88992        | <b>110076</b>  | 45356      | 60272        | 103516         | 34022      | 52053      |
| NGA50                       | 2249           | 46410      | 72650        | 89169             | 92378         | 90062         | 88992        | 103328         | 40119      | 58932        | <b>103516</b>  | 33437      | 47955      |
| NA75                        | 1291           | 8505       | 17828        | 16034             | 32144         | 29497         | 19133        | 31936          | 5555       | 10085        | <b>33354</b>   | 5109       | 6104       |
| NGA75                       | 1023           | 7399       | 13949        | 13414             | 29880         | 27418         | 15730        | 29786          | 4829       | 8845         | <b>30147</b>   | 4426       | 5399       |
| LA50                        | 411            | 27         | 20           | 17                | 16            | 17            | 19           | <b>12</b>      | 29         | 20           | 19             | 34         | 25         |
| LGA50                       | 537            | 29         | 21           | 18                | 17            | 18            | 19           | <b>13</b>      | 31         | 21           | 19             | 37         | 26         |
| LA75                        | 1201           | 99         | 57           | 59                | 44            | 48            | 57           | <b>40</b>      | 132        | 78           | 46             | 178        | 129        |
| LGA75                       | 1598           | 114        | 63           | 65                | 47            | 51            | 62           | <b>42</b>      | 158        | 90           | 48             | 205        | 150        |

#### 4.4.6 *H. sapiens* Chr. 21

Table 35 contains the Quast report after assembling dataset *H. sapiens* Chr. 21 with Velvet .

Table 35: Assembly quality metrics for *H. sapiens* Chr. 21

| Assembly                    | Uncorrected    | ACE            | BayesHammer    | BFC            | BLESS2         | Blue            | Fiona                 | Karect          | Lighter        | Musket         | RACER          | SGA-EC         | Trowl          |
|-----------------------------|----------------|----------------|----------------|----------------|----------------|-----------------|-----------------------|-----------------|----------------|----------------|----------------|----------------|----------------|
| # contigs (≥ 0 bp)          | 58213          | 58395          | 61700          | 57945          | 57438          | 57170           | 57769                 | 57668           | 57427          | 57852          | 58297          | 57344          | 57247          |
| # contigs (≥ 1000 bp)       | 6812           | 6402           | 6920           | 6367           | 6368           | 6277            | 6297                  | 6350            | 6638           | 6471           | 6424           | 6519           | 6622           |
| # contigs (≥ 5000 bp)       | 1664           | 1772           | 1615           | 1817           | 1811           | 1835            | 1821                  | 1824            | 1704           | 1756           | 1804           | 1775           | 1730           |
| # contigs (≥ 10000 bp)      | 404            | 496            | 386            | 477            | 488            | 535             | 533                   | 516             | 446            | 471            | 509            | 470            | 463            |
| # contigs (≥ 25000 bp)      | 11             | 26             | 16             | 31             | 28             | 26              | 32                    | 22              | 19             | 25             | 21             | 22             | 20             |
| # contigs (≥ 50000 bp)      | 0              | 0              | 0              | 0              | 0              | 0               | 0                     | 0               | 0              | 0              | 0              | 0              | 0              |
| Total length (≥ 0 bp)       | 31597631       | 31965979       | 31766176       | 32002529       | 31938926       | <b>32041901</b> | 32038486              | 31957612        | 31672081       | 31818334       | 32019235       | 31818763       | 31734651       |
| Total length (≥ 1000 bp)    | 26827458       | 27507605       | 26550208       | 27599231       | 27535385       | <b>27711114</b> | 27675394              | 27554984        | 27105876       | 27343993       | 27574676       | 27341004       | 27179349       |
| Total length (≥ 5000 bp)    | 14469620       | 16175954       | 13958509       | 16512649       | 16457706       | <b>16892313</b> | 16750500              | 16554128        | 15163420       | 15814857       | 16386813       | 15851231       | 15456691       |
| Total length (≥ 10000 bp)   | 5646166        | 7232550        | 5447698        | 7068887        | 7173080        | <b>7760310</b>  | 7437243               | 7437243         | 6381022        | 6825114        | 7312274        | 6776893        | 6569323        |
| Total length (≥ 25000 bp)   | 305814         | 741358         | 449079         | 873737         | 799632         | <b>941610</b>   | 607723                | 524852          | 700429         | 569855         | 610919         | 568491         | 568491         |
| Total length (≥ 50000 bp)   | 0              | 0              | 0              | 0              | 0              | 0               | 0                     | 0               | 0              | 0              | 0              | 0              | 0              |
| # contigs                   | 8747           | 8004           | 9061           | 7959           | 7994           | 7845            | 7855                  | 7958            | 8450           | 8151           | 8059           | 8235           | 8402           |
| Largest contig              | 31896          | 39067          | 39290          | 34106          | 44280          | 32458           | <b>46072</b>          | 34407           | 32368          | 34493          | 38599          | 33802          | 38545          |
| Total length                | 28232361       | 28673142       | 28101089       | 28756929       | 28718924       | <b>28852292</b> | 28810533              | 28720889        | 28462853       | 28563707       | 28760555       | 28590292       | 28479294       |
| Reference length            | 46709983       | 46709983       | 46709983       | 46709983       | 46709983       | <b>46709983</b> | 46709983              | 46709983        | 46709983       | 46709983       | 46709983       | 46709983       | 46709983       |
| GC (%)                      | 39.53          | 39.66          | 39.26          | 39.69          | 39.68          | 39.74           | 39.72                 | 39.73           | 39.62          | 39.64          | 39.73          | 39.65          | 39.58          |
| Reference GC (%)            | 42.22          | 42.22          | 42.22          | 42.22          | 42.22          | 42.22           | 42.22                 | 42.22           | 42.22          | 42.22          | 42.22          | 42.22          | 42.22          |
| N50                         | 5159           | 5885           | 4963           | 5993           | 6024           | <b>6163</b>     | 6125                  | 5985            | 5395           | 5688           | 5921           | 5646           | 5524           |
| NG50                        | 2054           | 2425           | 1914           | 2472           | 2440           | <b>2543</b>     | 2519                  | 2456            | 2194           | 2342           | 2435           | 2324           | 2217           |
| N75                         | 2676           | 3007           | 2563           | 3031           | 3024           | <b>3099</b>     | 3088                  | 3035            | 2812           | 2938           | 2992           | 2911           | 2815           |
| L50                         | 1595           | 1434           | 1634           | 1429           | 1430           | <b>1393</b>     | 1397                  | 1424            | 1522           | 1469           | 1457           | 1481           | 1499           |
| LC50                        | 4437           | 3835           | 4640           | 3772           | 3790           | <b>3647</b>     | 3685                  | 3775            | 4176           | 3953           | 3868           | 3980           | 4114           |
| L75                         | 3512           | 3153           | 3616           | 3122           | 3122           | <b>3037</b>     | 3061                  | 3113            | 3360           | 3219           | 3148           | 3246           | 3319           |
| # misassemblies             | 612            | 620            | <b>545</b>     | 610            | 732            | 715             | 653                   | 573             | 668            | 650            | 644            | 663            | 682            |
| # misassembled contigs      | 467            | 449            | <b>403</b>     | 449            | 526            | 502             | 484                   | 431             | 478            | 449            | 481            | 515            | 482            |
| Misassembled contigs length | 3326586        | 3566126        | <b>3019786</b> | 3568048        | 4202668        | 4253263         | 4091809               | 3584831         | 3642250        | 3563655        | 3822684        | 3936298        | 3766679        |
| # local misassemblies       | 1010           | 1047           | <b>932</b>     | 979            | 1023           | 1130            | 1091                  | 1045            | 1063           | 1155           | 1100           | 1043           | 964            |
| # structural variations     | 0              | 0              | 0              | 0              | 0              | 0               | 0                     | 0               | 0              | 0              | 0              | 0              | 0              |
| # unaligned mis. contigs    | 79             | 166            | <b>44</b>      | 166            | <b>44</b>      | 61              | 51                    | 45              | 59             | 58             | 52             | 49             | 62             |
| # unaligned contigs         | 324 + 573 part | 173 + 432 part | 547 + 925 part | 178 + 385 part | 168 + 395 part | 168 + 435 part  | <b>162 + 396 part</b> | 169 + 380 part  | 194 + 477 part | 195 + 508 part | 174 + 413 part | 196 + 420 part | 245 + 486 part |
| Unaligned length            | 1322048        | 808832         | 2326663        | 748706         | 778800         | 807098          | 788398                | <b>726760</b>   | 939040         | 983333         | 803632         | 833188         | 1008440        |
| Genome fraction (%)         | 56.047         | 57.891         | 53.531         | 58.259         | 58.108         | 58.288          | 58.223                | <b>58.336</b>   | 57.182         | 57.292         | 58.184         | 57.824         | 57.083         |
| Duplication ratio           | <b>1.028</b>   | 1.031          | 1.031          | 1.029          | 1.029          | 1.030           | 1.030                 | <b>1.028</b>    | 1.029          | 1.031          | 1.029          | <b>1.028</b>   | 1.030          |
| # Ns per 100 kbp            | 3319.46        | 3550.95        | 4309.26        | 3339.67        | 3350.99        | 3317.24         | 3364.41               | 3182.06         | 3335.42        | 3523.72        | <b>3166.64</b> | 3175.33        | 3480.50        |
| # mismatches per 100 kbp    | 231.08         | 227.19         | 225.64         | 222.01         | 220.04         | 227.97          | 221.99                | 223.26          | <b>217.30</b>  | 226.65         | 235.20         | 230.24         | 224.21         |
| # indels per 100 kbp        | 105.34         | 96.56          | 107.85         | 98.84          | <b>95.34</b>   | 100.22          | 102.30                | 97.87           | 98.32          | 101.21         | 101.90         | 104.69         | 102.08         |
| Largest alignment           | 29853          | 31527          | 31348          | 31451          | 31659          | 31447           | 29919                 | 31822           | 31611          | 31801          | 31288          | <b>32138</b>   | 31294          |
| Total aligned length        | 26211189       | 27039009       | 25050677       | 27217144       | 27152844       | 27236838        | 27204838              | <b>27244840</b> | 26727737       | 26769049       | 27180503       | 27028047       | 26686854       |
| NA50                        | 4224           | 4851           | 3965           | 4988           | 4887           | 5006            | 4988                  | <b>5025</b>     | 4475           | 4661           | 4859           | 4712           | 4525           |
| NGA50                       | 1367           | 1756           | 994            | 1845           | 1786           | 1865            | 1845                  | <b>1871</b>     | 1566           | 1653           | 1807           | 1718           | 1566           |
| NA75                        | 2027           | 2350           | 1675           | 2416           | 2361           | 2396            | 2399                  | <b>2436</b>     | 2177           | 2245           | 2360           | 2295           | 2163           |
| LA50                        | 1888           | 1685           | 1957           | 1663           | 1694           | 1659            | 1649                  | <b>1647</b>     | 1808           | 1767           | 1731           | 1785           | 1785           |
| LGA50                       | 5584           | 4720           | 6417           | 4591           | 4699           | 4556            | <b>4555</b>           | 4556            | 5180           | 4941           | 4689           | 4865           | 5141           |
| LA75                        | 4284           | 3814           | 4658           | 3746           | 3816           | 3743            | <b>3710</b>           | 3710            | 4085           | 3945           | 3827           | 3908           | 4065           |

#### 4.4.7 *C. elegans*

Table 36 contains the Quast report after assembling dataset *C. elegans* with Velvet .

Table 36: Assembly quality metrics for *C. elegans*

| Assembly                    | Uncorrected      | ACE             | BayesHammer     | BFC             | BLESS2          | Blue            | Karect          | Lighter         | RACER                  | SGA-EC          |
|-----------------------------|------------------|-----------------|-----------------|-----------------|-----------------|-----------------|-----------------|-----------------|------------------------|-----------------|
| # contigs (≥ 0 bp)          | 313458           | 247789          | 260292          | 223399          | 195321          | 207345          | 200640          | 291328          | 193008                 | 228459          |
| # contigs (≥ 1000 bp)       | 21506            | 25791           | 25237           | 26495           | 26687           | 26077           | 25766           | 23368           | 25455                  | 26639           |
| # contigs (≥ 5000 bp)       | 452              | 562             | 556             | 1374            | 1915            | 2107            | 2236            | 434             | 2549                   | 1384            |
| # contigs (≥ 10000 bp)      | 104              | 46              | 17              | 103             | 190             | 285             | 269             | 73              | 394                    | 123             |
| # contigs (≥ 25000 bp)      | 5                | 1               | 0               | 1               | 7               | 11              | 10              | 5               | 27                     | 5               |
| # contigs (≥ 50000 bp)      | 0                | 0               | 0               | 0               | 0               | 0               | 0               | 0               | 2                      | 0               |
| Total length (≥ 0 bp)       | <b>100514891</b> | 94677328        | 95949746        | 96223212        | 94442104        | 97069690        | 95356117        | 98710361        | 95898310               | 97728152        |
| Total length (≥ 1000 bp)    | 37905692         | 48928957        | 48505197        | 58787718        | 64099874        | 64609003        | 64449307        | 41827510        | <b>67692343</b>        | 59067924        |
| Total length (≥ 5000 bp)    | 3832338          | 3819461         | 3531390         | 9485659         | 13824216        | 15914879        | 16622537        | 3441481         | <b>19988122</b>        | 9813852         |
| Total length (≥ 10000 bp)   | 1501701          | 613323          | 208156          | 1312103         | 2566271         | 3941268         | 3712693         | 1104325         | <b>5832892</b>         | 1651044         |
| Total length (≥ 25000 bp)   | 144182           | 26729           | 0               | 30830           | 198141          | 346721          | 302882          | 156627          | <b>902471</b>          | 142834          |
| Total length (≥ 50000 bp)   | 0                | 0               | 0               | 0               | 0               | 0               | 0               | 0               | <b>124006</b>          | 0               |
| # contigs                   | 59201            | 55137           | 54557           | 49896           | 46077           | 46120           | 44909           | 58648           | 42732                  | 50765           |
| Largest contig              | 34936            | 26729           | 23739           | 30830           | 33772           | 38086           | 49047           | 37692           | <b>70494</b>           | 34846           |
| Total length                | 64279025         | 69730098        | 69246748        | 75436498        | 77994023        | 78900340        | 78118154        | 66601578        | <b>80035157</b>        | 76221496        |
| Reference length            | 100286070        | 100286070       | 100286070       | 100286070       | 100286070       | 100286070       | 100286070       | 100286070       | 100286070              | 100286070       |
| GC (%)                      | 38.74            | 38.50           | 37.36           | 37.78           | 37.65           | 37.84           | 37.60           | 38.67           | 37.64                  | 37.96           |
| Reference GC (%)            | 35.44            | 35.44           | 35.44           | 35.44           | 35.44           | 35.44           | 35.44           | 35.44           | 35.44                  | 35.44           |
| N50                         | 1161             | 1469            | 1488            | 1925            | 2229            | 2304            | 2365            | 1247            | <b>2625</b>            | 1897            |
| NG50                        | 735              | 966             | 953             | 1323            | 1610            | 1658            | 1661            | 804             | <b>1917</b>            | 1329            |
| N75                         | 771              | 907             | 903             | 1078            | 1222            | 1221            | 1247            | 808             | <b>1356</b>            | 1064            |
| NG75                        | -                | -               | -               | 505             | 596             | 620             | 600             | -               | 686                    | 527             |
| L50                         | 16144            | 14108           | 13793           | 11163           | 9769            | 9315            | 9018            | 15713           | <b>8214</b>            | 11284           |
| LG50                        | 35856            | 27027           | 26915           | 18971           | 15665           | 14807           | 14640           | 32673           | <b>12741</b>           | 18887           |
| L75                         | 33287            | 29329           | 28847           | 24365           | 21616           | 21165           | 20519           | 32435           | <b>18870</b>           | 24795           |
| LG75                        | -                | -               | -               | 49455           | 40994           | 39514           | 39613           | -               | 34527                  | 48803           |
| # misassemblies             | <b>3096</b>      | 6019            | 5842            | 6981            | 8317            | 7594            | 8174            | 4317            | 8798                   | 6525            |
| # misassembled contigs      | <b>2571</b>      | 4736            | 4640            | 5488            | 6301            | 5792            | 6221            | 3504            | 6669                   | 5157            |
| Misassembled contigs length | <b>3102213</b>   | 8112983         | 8555204         | 12333155        | 16017169        | 15172010        | 16532475        | 4808532         | 19081800               | 11271909        |
| # local misassemblies       | <b>507</b>       | 922             | 809             | 1241            | 1705            | 1479            | 1544            | 718             | 1429                   | 1153            |
| # unaligned mis. contigs    | 93               | 87              | <b>47</b>       | 65              | 92              | 77              | 67              | 87              | 87                     | 71              |
| # unaligned contigs         | 5589 + 220 part  | 6249 + 393 part | 6479 + 341 part | 5193 + 420 part | 4282 + 567 part | 4503 + 532 part | 4249 + 480 part | 6133 + 347 part | <b>3909 + 565 part</b> | 5144 + 398 part |
| Unaligned length            | 11242801         | 10009213        | <b>7771997</b>  | 9601446         | 8858941         | 10229836        | 9092027         | 11050356        | 9511857                | 10527959        |
| Genome fraction (%)         | 52.408           | 58.937          | 60.701          | 64.935          | 68.154          | 67.705          | 68.038          | 54.835          | <b>69.539</b>          | 64.807          |
| Duplication ratio           | <b>1.009</b>     | 1.010           | 1.010           | 1.011           | 1.012           | 1.011           | 1.012           | 1.010           | 1.011                  | 1.011           |
| # N's per 100 kbp           | <b>228.09</b>    | 487.99          | 461.80          | 435.10          | 527.78          | 490.59          | 484.83          | 348.43          | 484.22                 | 434.66          |
| # mismatches per 100 kbp    | <b>17.40</b>     | 36.43           | 31.51           | 32.18           | 41.89           | 35.48           | 38.08           | 25.36           | 73.35                  | 32.31           |
| # indels per 100 kbp        | <b>13.79</b>     | 28.27           | 26.68           | 29.41           | 34.82           | 32.06           | 33.98           | 19.61           | 38.98                  | 28.71           |
| Largest alignment           | 10782            | 10826           | 13458           | 16311           | 20974           | 17720           | 19637           | 7927            | <b>21899</b>           | 14320           |
| Total aligned length        | 52796255         | 59255569        | 61056499        | 65312826        | 68475519        | 68063868        | 68398255        | 55196310        | <b>69843929</b>        | 65182944        |
| NA50                        | 865              | 1100            | 1207            | 1386            | 1589            | 1570            | 1639            | 929             | <b>1755</b>            | 1336            |
| NGA50                       | 524              | 670             | 724             | 898             | 1075            | 1066            | 1094            | 565             | <b>1205</b>            | 882             |
| NA75                        | 556              | 618             | 679             | 698             | 771             | 732             | 771             | 568             | <b>791</b>             | 673             |
| LA50                        | 22902            | 18373           | 16311           | 14821           | 13371           | 13316           | 12657           | 21561           | <b>12008</b>           | 15481           |
| LGA50                       | 49744            | 36229           | 33004           | 26009           | 21931           | 21611           | 20964           | 44967           | <b>18983</b>           | 26594           |
| LA75                        | 46161            | 39575           | 35559           | 34141           | 31114           | 31843           | 30160           | 44628           | <b>29099</b>           | 35712           |

#### 4.4.8 *D. melanogaster*

Table 37 contains the Quast report after assembling dataset *D. melanogaster* with Velvet .

Table 37: Assembly quality metrics for *D. melanogaster*

| Assembly                        | Uncorrected      | ACE           | BayesHammer     | BFC       | BLESS2       | Blue            | Fiona          | Karect    | Lighter   | Musket    | RACER            | SGA-EC           | Trowel    |
|---------------------------------|------------------|---------------|-----------------|-----------|--------------|-----------------|----------------|-----------|-----------|-----------|------------------|------------------|-----------|
| # contigs ( $\geq 0$ bp)        | 100458           | 88911         | 119593          | 85549     | 79158        | 82740           | 84689          | 81344     | 93233     | 90739     | 80832            | 87971            | 89636     |
| # contigs ( $\geq 1000$ bp)     | 11374            | 9011          | 17268           | 8526      | 8241         | 8091            | 8111           | 8240      | 9556      | 9147      | 7913             | 8601             | 9091      |
| # contigs ( $\geq 5000$ bp)     | 5987             | 5107          | 6894            | 4877      | 4733         | 4635            | 4720           | 4722      | 5364      | 5155      | 4613             | 4931             | 5143      |
| # contigs ( $\geq 10000$ bp)    | 3535             | 3326          | 3009            | 3279      | 3147         | 3153            | 3151           | 3196      | 3412      | 3337      | 3117             | 3279             | 3373      |
| # contigs ( $\geq 25000$ bp)    | 1026             | 1250          | 452             | 1308      | 1323         | 1330            | 1307           | 1319      | 1216      | 1263      | 1326             | 1327             | 1279      |
| # contigs ( $\geq 50000$ bp)    | 170              | 326           | 41              | 370       | 385          | 430             | 424            | 399       | 289       | 343       | 420              | 352              | 330       |
| Total length ( $\geq 0$ bp)     | <b>119882706</b> | 118726428     | 119848583       | 118515422 | 117590011    | 118625990       | 118503169      | 117997496 | 118883364 | 118806330 | 118363831        | 119238372        | 118992862 |
| Total length ( $\geq 1000$ bp)  | 119945820        | 111997301     | 106901197       | 111963831 | 111698533    | 112321082       | 112161292      | 111864739 | 111467757 | 111861476 | 112363368        | <b>112403232</b> | 111949002 |
| Total length ( $\geq 5000$ bp)  | 97402333         | 102208382     | 8135521         | 102851188 | 102882775    | 103667092       | 103651250      | 103991852 | 100907891 | 101840130 | <b>104026229</b> | 103212029        | 103074935 |
| Total length ( $\geq 10000$ bp) | 79831793         | 89406719      | 54899046        | 91272984  | 91527739     | 92962077        | 92357632       | 92058152  | 86780805  | 88720766  | <b>93238860</b>  | 91212888         | 89264983  |
| Total length ( $\geq 25000$ bp) | 40283233         | 56922323      | 15731892        | 59703455  | 61872079     | 63667742        | 62631987       | 61838260  | 51841237  | 55635456  | <b>64062266</b>  | 59834606         | 55761936  |
| Total length ( $\geq 50000$ bp) | 11289515         | 24250126      | 2493053         | 27166693  | 28985837     | <b>32552918</b> | 32110811       | 30144152  | 20129253  | 24524703  | 34252565         | 26652606         | 23142099  |
| # contigs                       | 14234            | 10680         | 23134           | 10165     | 9704         | 9648            | 9635           | 9737      | 11551     | 10876     | 9352             | 10330            | 10889     |
| Largest contig                  | 135981           | 199070        | 109411          | 221622    | 178719       | 206508          | <b>310228</b>  | 201137    | 209745    | 192773    | 241683           | 181525           | 132175    |
| Total length                    | 112964497        | 113189748     | 111071275       | 113126301 | 112747850    | 113439699       | 113252292      | 112945093 | 112879620 | 113089933 | 113380755        | <b>113629454</b> | 113223579 |
| Reference length                | 120381546        | 120381546     | 120381546       | 120381546 | 120381546    | 120381546       | 120381546      | 120381546 | 120381546 | 120381546 | 120381546        | 120381546        | 120381546 |
| GC (%)                          | 42.60            | 42.72         | 42.58           | 42.67     | 42.70        | 42.66           | 42.68          | 42.69     | 42.69     | 42.63     | 42.67            | 42.62            | 42.62     |
| Reference GC (%)                | 42.42            | 42.42         | 42.42           | 42.42     | 42.42        | 42.42           | 42.42          | 42.42     | 42.42     | 42.42     | 42.42            | 42.42            | 42.42     |
| N50                             | 17913            | 24554         | 9867            | 20837     | 28286        | 29247           | 28679          | 27863     | 22711     | 24530     | <b>29535</b>     | 26543            | 24455     |
| NG50                            | 10416            | 22835         | 8837            | 24772     | 20047        | 27206           | 26378          | 25842     | 20639     | 22816     | <b>27373</b>     | 24862            | 22520     |
| N75                             | 8526             | 11868         | 4675            | 12862     | 13459        | 13756           | 13529          | 13415     | 10623     | 11586     | <b>14073</b>     | 12604            | 11792     |
| NG75                            | 6914             | 9612          | 3561            | 10392     | 10598        | 11144           | 10940          | 10722     | 8757      | 9402      | <b>11526</b>     | 10375            | 9573      |
| L50                             | 1795             | 1271          | 3134            | 1187      | 1117         | 1074            | 1083           | 1116      | 1409      | 1300      | <b>1055</b>      | 1210             | 1314      |
| LG50                            | 2012             | 1422          | 3632            | 1328      | 1197         | 1213            | 1255           | 1583      | 1455      | 1179      | <b>1179</b>      | 1342             | 1466      |
| L75                             | 494              | 2940          | 7212            | 2710      | 2550         | 2181            | 2514           | 2562      | 3286      | 2974      | <b>2430</b>      | 2744             | 2972      |
| LG75                            | 4786             | 3416          | 8915            | 3182      | 3027         | 2900            | 2953           | 3025      | 3787      | 3498      | <b>2841</b>      | 3188             | 3478      |
| # misassemblies                 | 2610             | 2678          | <b>2245</b>     | 2943      | 3004         | 2763            | 2805           | 2964      | 2837      | 2865      | 3015             | 2763             | 2752      |
| # misassembled contigs          | 1702             | <b>1591</b>   | 1642            | 1744      | 1767         | 1618            | 1613           | 1697      | 1758      | 1716      | 1708             | 1625             | 1652      |
| Misassembled contigs length     | 37525466         | 45699234      | <b>22889624</b> | 50047465  | 51430351     | 51426960        | 51283937       | 51124905  | 44579745  | 47627338  | 53793688         | 48252389         | 46125881  |
| # local misassemblies           | 4593             | 4126          | 3264            | 3497      | 3907         | 3631            | <b>3093</b>    | 3514      | 3533      | 5132      | 3031             | 4411             | 4116      |
| # unaligned mis. contigs        | 140              | 105           | 92              | 81        | <b>68</b>    | 91              | 69             | 72        | 113       | 168       | 71               | 87               | 111       |
| Unaligned length                | 7337009          | 6218045       | 6918913         | 5294992   | 4762484      | 5188181         | <b>4750697</b> | 4835002   | 6177471   | 7387538   | 4789677          | 6035593          | 6870105   |
| Genome fraction (%)             | 86.998           | 88.216        | 85.890          | 89.083    | 89.225       | 89.640          | 89.610         | 89.211    | 87.808    | 87.092    | <b>89.757</b>    | 88.695           | 87.712    |
| Duplication ratio               | 1.009            | 1.007         | 1.007           | 1.006     | <b>1.005</b> | 1.007           | 1.005          | 1.007     | 1.008     | 1.005     | <b>1.005</b>     | 1.008            | 1.007     |
| # N's per 100 kbp               | 980.75           | 835.91        | 988.73          | 760.40    | 831.13       | 731.83          | 725.02         | 754.48    | 944.90    | 947.83    | <b>668.91</b>    | 817.92           | 925.11    |
| # mismatches per 100 kbp        | 564.79           | 558.01        | <b>555.27</b>   | 559.91    | 559.86       | 560.81          | 565.23         | 560.81    | 559.92    | 561.03    | 571.05           | 561.40           | 560.87    |
| # indels per 100 kbp            | 175.12           | 171.61        | <b>161.22</b>   | 169.16    | 163.26       | 167.67          | 171.56         | 167.46    | 173.98    | 175.49    | 172.57           | 171.33           | 174.66    |
| Largest alignment               | 111277           | <b>161258</b> | 93672           | 121105    | 144032       | 139852          | 143266         | 128118    | 156286    | 111130    | 148210           | 156346           | 120063    |
| Total aligned length            | 10480288         | 10627984      | 103413181       | 107499667 | 107402520    | 107600578       | 107947498      | 107465148 | 105741335 | 104876059 | <b>108061294</b> | 106822163        | 105640715 |
| NA50                            | 13000            | 17118         | 8622            | 17962     | 19023        | <b>19579</b>    | 19232          | 18786     | 15721     | 16111     | 15489            | 18071            | 18834     |
| NGA50                           | 12003            | 15074         | 7179            | 16511     | 17330        | 18078           | 17860          | 17351     | 15966     | 14419     | <b>16963</b>     | 16663            | 13520     |
| NAT5                            | 5801             | 7874          | 3504            | 8262      | 8529         | 8942            | 8896           | 8589      | 7186      | 7128      | <b>8961</b>      | 8189             | 7513      |
| NGA75                           | 4472             | 6214          | 2430            | 6613      | 6684         | 7203            | 7226           | 6872      | 5628      | 5584      | <b>7236</b>      | 6642             | 5864      |
| LA50                            | 2444             | 1828          | 3807            | 1758      | 1647         | <b>1608</b>     | 1631           | 1656      | 2002      | 1908      | 1622             | 1779             | 1891      |
| EGA50                           | 2741             | 2044          | 4420            | 1968      | 1556         | <b>1793</b>     | 1824           | 1862      | 2251      | 2140      | 1808             | 1974             | 2114      |
| LAT5                            | 5663             | 4240          | 8975            | 4058      | 3831         | <b>3745</b>     | 3784           | 3867      | 4646      | 4483      | 3750             | 4066             | 4392      |
| LGA75                           | 6750             | 5011          | 11352           | 4790      | 4589         | <b>4393</b>     | 4452           | 4590      | 5530      | 5353      | 4400             | 4780             | 5199      |

## 5 Ability of EC tools to improve genome assembly

Error correction does not always lead to a more fragmented assembly. Fig. 2 shows a case where Karect corrects sequencing errors around a poorly covered region. In the initial reads there was a true 21-mer missing, and the error correction allowed the assembler to assemble the two sets of reads into a single contig.

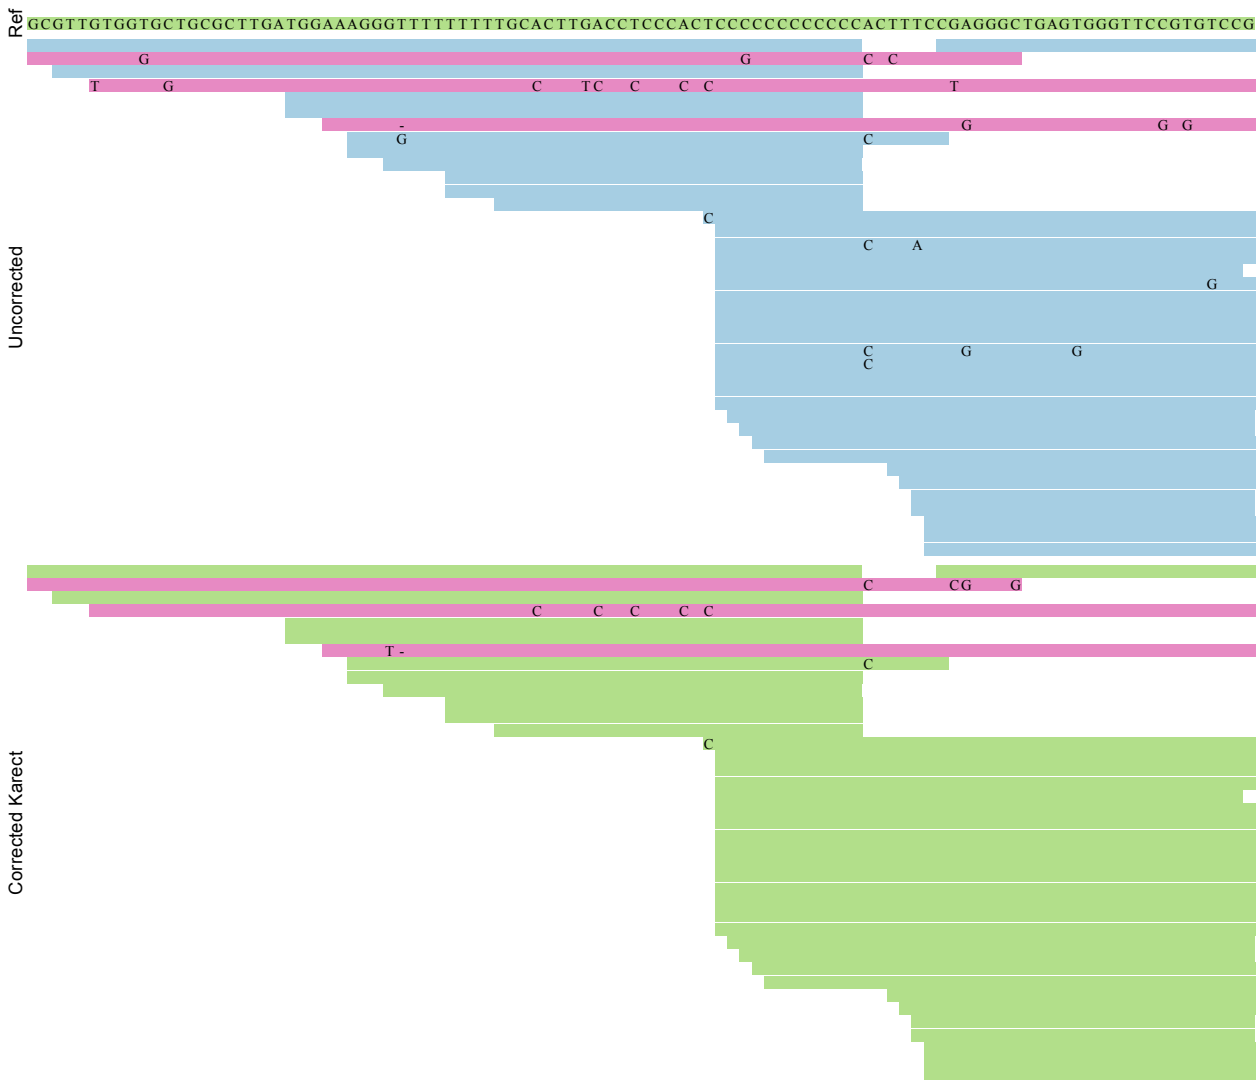

Figure 2: Error correction with Karect resolves a breakpoint in the uncorrected data assembly. The first track (Ref) shows a part of the reference genome, which is assembled into a single contig from Karect-corrected reads. The second track (Uncorrected) shows the alignment of the uncorrected reads to the reference. The third track (Corrected Karect) uses these same alignment positions, but with the sequence content of reads corrected by Karect. The short overlap between the uncorrected reads is less than 21, i.e., a true 21-mer is missing from the uncorrected data. There are three reads which expand along this region but they contain some errors which are highlighted in purple. After error correction those three reads are partially cleaned which suffices to connect the two groups of reads.

## 6 Memory and Runtime

### 6.1 Real Data

#### 6.1.1 Memory

In the main paper peak memory usage was measured for all EC tools. Table 38 shows the exact numbers for reference. Furthermore, the possible effects of error correction on the memory usage of assemblers have also been measured. Results are shown for DISCOVER and SPAdes. Fig. 3 shows the peak memory usage of the EC tools next to the the peak memory usage of SPAdes. While Fig. 4 shows the peak memory usage of the EC tools next to the the peak memory usage of DISCOVER.

Table 38: Memory usage of EC tools (GB)

| Tool        | <i>B. dentium</i> | <i>E. coli DH10B</i> | <i>E. coli MG1655</i> | <i>S. enterica</i> | <i>P. aeruginosa</i> | <i>H. sapiens</i> Chr. 21 | <i>C. elegans</i> | <i>D. melanogaster</i> |
|-------------|-------------------|----------------------|-----------------------|--------------------|----------------------|---------------------------|-------------------|------------------------|
| BayesHammer | 9.97              | 18.87                | 20.68                 | 15.06              | 18.48                | 17.00                     | 21.78             | 27.38                  |
| BFC         | 0.95              | 1.06                 | 1.47                  | 0.96               | 1.18                 | 2.43                      | 5.16              | 5.22                   |
| BLESS2      | 3.88              | 3.90                 | 3.89                  | 2.95               | 3.90                 | 3.90                      | 3.90              | 3.90                   |
| Blue        | 1.43              | 2.15                 | 2.42                  | 1.41               | 1.30                 | 3.66                      | 8.12              | 8.48                   |
| Fiona       | 6.52              | 14.08                | 20.49                 | 3.35               | 7.11                 | 10.03                     | 43.61             | 48.06                  |
| Karect      | 22.76             | 43.98                | 67.36                 | 10.01              | 23.62                | 29.49                     | 135.56            | 144.18                 |
| Lighter     | 0.35              | 0.36                 | 0.36                  | 0.36               | 0.37                 | 0.55                      | 0.82              | 0.90                   |
| Musket      | 0.78              | 0.66                 | 0.98                  | 0.74               | 0.51                 | 0.76                      | 2.40              | 3.04                   |
| SGA-EC      | 0.27              | 0.51                 | 0.97                  | 0.19               | 0.34                 | 0.54                      | 1.95              | 2.17                   |
| Trowel      | 0.49              | 0.57                 | 0.90                  | 0.44               | 0.50                 | 0.52                      | 1.79              | 2.14                   |

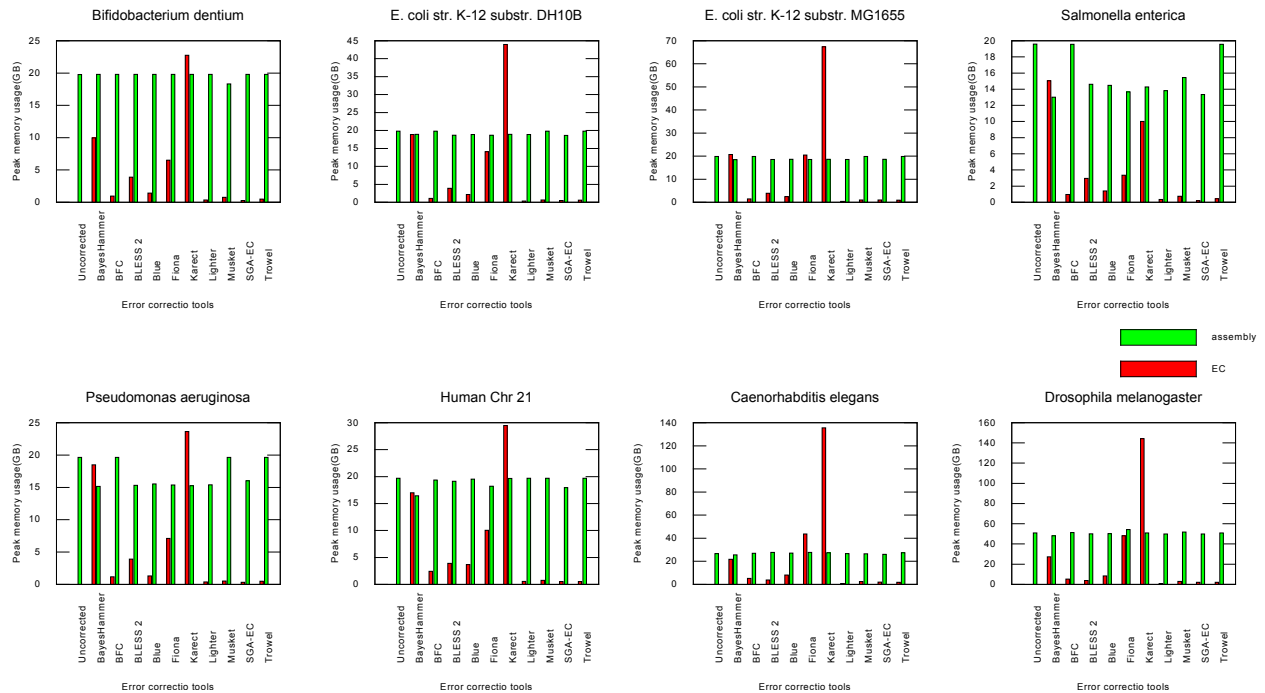

Figure 3: Peak memory usage of SPAdes and EC tools.

#### 6.1.2 Runtime

The runtime plot of the EC tools is shown in the paper, Table 39 shows the exact numbers.

We also recorded the possible effects of error correction on the assembly runtime for DISCOVER and SPAdes. Fig. 5 shows the total runtime for error correction plus SPAdes assembly. Fig. 6 shows the same graph for DISCOVER.



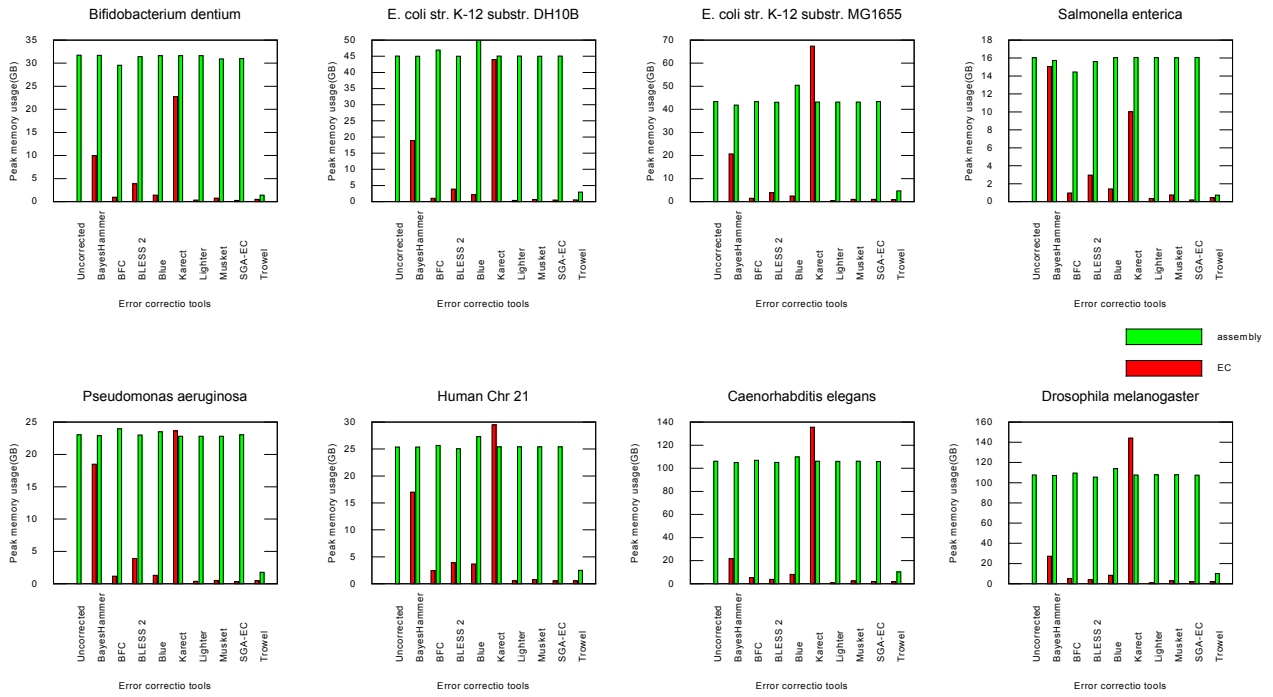

Figure 4: Peak memory usage of DISCOVERAR and EC tools.

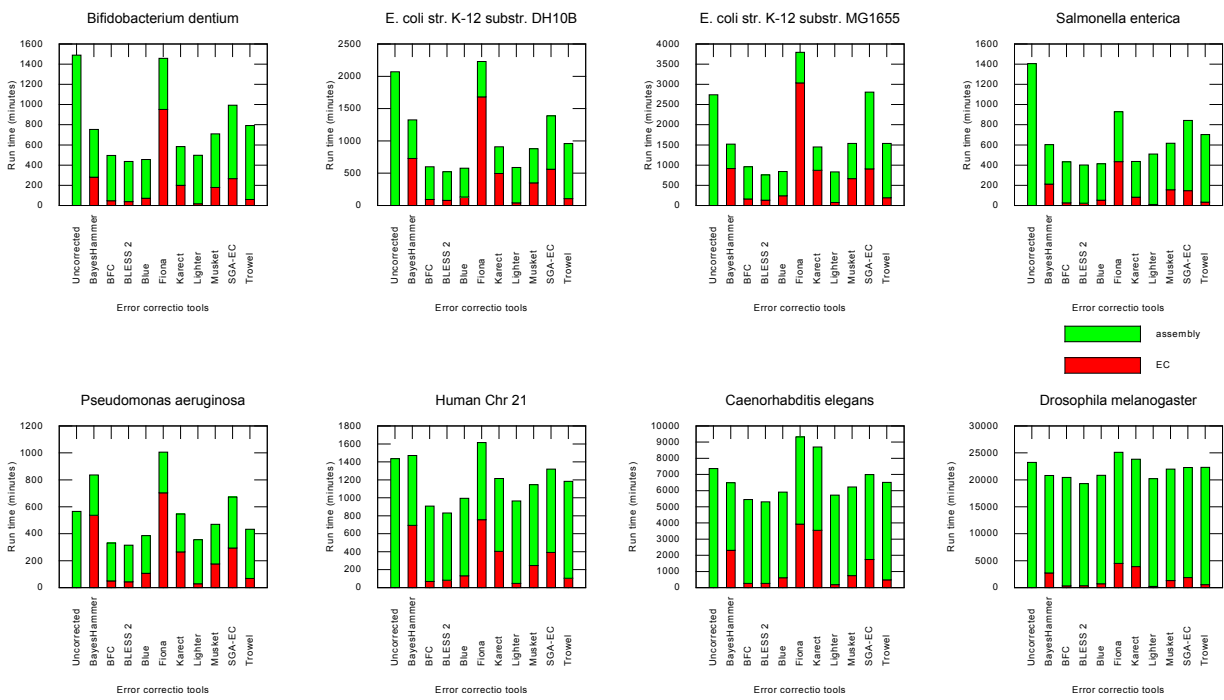

Figure 5: Runtime of SPAdes plus EC tools.

Table 39: Runtime of EC tools (min)

| Tool        | <i>B. dentium</i> | <i>E. coli DH10B</i> | <i>E. coli MG1655</i> | <i>S. enterica</i> | <i>P. aeruginosa</i> | <i>H. sapiens</i> Chr. 21 | <i>C. elegans</i> | <i>D. melanogaster</i> |
|-------------|-------------------|----------------------|-----------------------|--------------------|----------------------|---------------------------|-------------------|------------------------|
| BayesHammer | 4.66              | 12.15                | 15.30                 | 3.54               | 8.94                 | 11.55                     | 38.50             | 45.64                  |
| BFC         | 0.78              | 1.55                 | 2.67                  | 0.43               | 0.84                 | 1.17                      | 4.44              | 5.54                   |
| BLESS2      | 0.64              | 1.31                 | 2.17                  | 0.37               | 0.73                 | 1.38                      | 4.44              | 6.02                   |
| Blue        | 1.18              | 2.20                 | 4.00                  | 0.87               | 1.78                 | 2.21                      | 10.27             | 12.26                  |
| Fiona       | 15.87             | 28.01                | 50.63                 | 7.24               | 11.73                | 12.60                     | 65.50             | 74.72                  |
| Karect      | 3.33              | 8.26                 | 14.54                 | 1.39               | 4.43                 | 6.72                      | 59.08             | 65.13                  |
| Lighter     | 0.28              | 0.70                 | 1.26                  | 0.17               | 0.49                 | 0.78                      | 3.01              | 3.87                   |
| Musket      | 2.99              | 5.83                 | 11.10                 | 2.61               | 2.93                 | 4.11                      | 12.36             | 21.94                  |
| SGA-EC      | 4.44              | 9.34                 | 15.13                 | 2.45               | 4.91                 | 6.52                      | 28.96             | 31.21                  |
| Trowel      | 1.00              | 1.79                 | 3.21                  | 0.54               | 1.13                 | 1.74                      | 7.98              | 9.13                   |

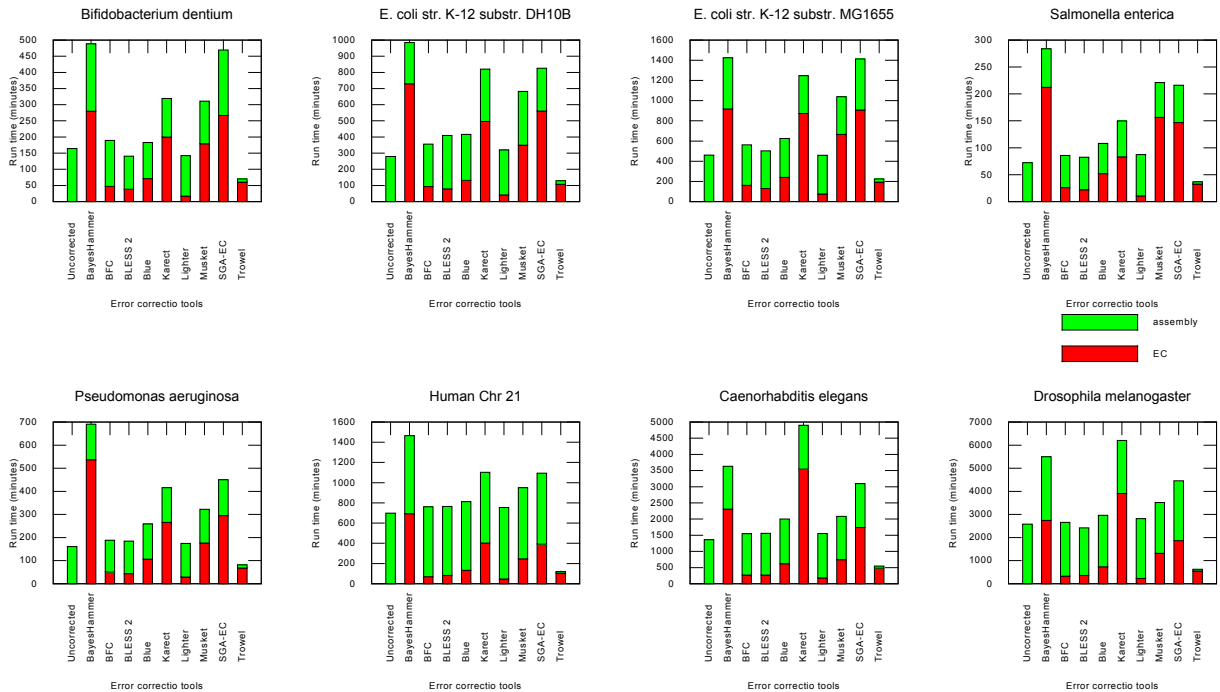

Figure 6: Runtime of DISCOVER plus EC tools.

## 6.2 Simulated Data

### 6.2.1 Memory

Table 40 shows the peak memory usage for all tools in simulated data.

Table 40: Peak memory usage of EC tools.

| Tool    | <i>B. dentium</i> | <i>E. coli DH10B</i> | <i>E. coli MG1655</i> | <i>S. enterica</i> | <i>P. aeruginosa</i> | <i>H. sapiens</i> Chr. 21 | <i>C. elegans</i> | <i>D. melanogaster</i> |
|---------|-------------------|----------------------|-----------------------|--------------------|----------------------|---------------------------|-------------------|------------------------|
| BFC     | 1.65              | 1.21                 | 3.40                  | 1.07               | 1.24                 | 3.00                      | 5.20              | 7.35                   |
| BLESS 2 | 3.90              | 3.90                 | 3.91                  | 2.95               | 3.90                 | 3.89                      | 3.90              | 3.90                   |
| Fiona   | 6.82              | 14.03                | 22.08                 | 3.26               | 7.79                 | 10.69                     | 43.50             | 49.33                  |
| Karect  | 22.74             | 43.99                | 67.31                 | 10.05              | 23.64                | 29.66                     | 135.89            | 146.49                 |
| Lighter | 0.35              | 0.36                 | 0.36                  | 0.36               | 0.37                 | 0.56                      | 0.81              | 0.90                   |
| Musket  | 1.05              | 0.62                 | 1.77                  | 0.76               | 0.49                 | 1.10                      | 1.58              | 7.75                   |
| SGA-EC  | 0.32              | 0.51                 | 1.02                  | 0.21               | 0.35                 | 0.56                      | 1.86              | 2.53                   |
| Trowel  | 0.49              | 0.75                 | 0.88                  | 0.46               | 0.49                 | 0.51                      | 1.70              | 1.85                   |

### 6.2.2 Runtime

We recorded elapsed (wall clock) time to measure the runtime. Table 41 shows the runtime of EC tools on simulated data.

Table 41: Runtime of the EC tools.

| Tool    | <i>B. dentium</i> | <i>E. coli DH10B</i> | <i>E. coli MG1655</i> | <i>S. enterica</i> | <i>P. aeruginosa</i> | <i>H. sapiens</i> Chr. 21 | <i>C. elegans</i> | <i>D. melanogaster</i> |
|---------|-------------------|----------------------|-----------------------|--------------------|----------------------|---------------------------|-------------------|------------------------|
| BFC     | 0.92              | 1.74                 | 2.78                  | 0.44               | 0.87                 | 1.47                      | 4.99              | 6.75                   |
| BLESS 2 | 0.80              | 1.24                 | 2.27                  | 0.37               | 0.71                 | 1.37                      | 4.21              | 5.57                   |
| Fiona   | 27.58             | 22.82                | 53.40                 | 6.84               | 11.10                | 12.49                     | 64.93             | 70.48                  |
| Karect  | 3.29              | 7.36                 | 16.10                 | 1.30               | 3.22                 | 9.54                      | 27.81             | 41.47                  |
| Lighter | 0.28              | 0.73                 | 1.39                  | 0.16               | 0.46                 | 0.91                      | 3.00              | 3.47                   |
| Musket  | 4.12              | 2.19                 | 8.09                  | 1.47               | 1.32                 | 3.78                      | 7.59              | 17.29                  |
| SGA-EC  | 5.52              | 8.61                 | 14.32                 | 2.43               | 4.62                 | 7.34                      | 27.95             | 34.69                  |
| Trowel  | 1.06              | 2.00                 | 3.29                  | 0.55               | 1.18                 | 2.11                      | 6.67              | 9.96                   |
